# Supplementary material for: Redox-neutral zinc-catalyzed cascade [1,4]-H shift/annulation of diaziridines with donor–acceptor aziridines
Source: Royal Society of Chemistry journal article supplement (doi:10.1039/d4cc00226a), 2024-01-01

**Redox-neutral zinc-catalyzed cascade [1,4]-H shift/annulation of diaziridines with donor-acceptor aziridines**

**Table of Contents**

|    |                                                                           |        |
|----|---------------------------------------------------------------------------|--------|
| 1  | General Information                                                       | S2     |
| 2  | Crystal Structure and Data of <b>3am</b>                                  | S2-4   |
| 3  | Optimization Studies                                                      | S4-5   |
| 4  | General Procedure for the Preparation of Diaziridines                     | S5     |
| 5  | General Procedure for the Preparation of DA Aziridines                    | S5     |
| 7  | General Procedure for the Annulation of Diaziridines with DA Aziridines   | S6     |
| 8  | Procedure for the Preparation of 1-benzyl-4,5-dihydro-1H-pyrazole         | S6     |
| 9  | Scale-up Synthesis                                                        | S6     |
| 10 | Procedure for the Post-Synthetic Modifications                            | S6-7   |
| 11 | Procedure for the Preparation of <b>2h'</b> and <b>3ah'</b>               | S7-8   |
| 12 | HPLC Chromatograms of <b>2h</b> , <b>2h'</b> , <b>3ah</b> and <b>3ah'</b> | S8-9   |
| 13 | Characterization Data                                                     | S10-25 |
| 14 | ADMET and Molecular Docking Studies of Compound <b>4</b>                  | S26-29 |
| 15 | References                                                                | S29-30 |
| 16 | NMR ( <sup>1</sup> H, <sup>13</sup> C, <sup>19</sup> F) Spectra           | S30-64 |

**General Information.** Aldehydes, Zn(OTf)<sub>2</sub> (≥98%), Sc(OTf)<sub>3</sub> (99%), Yb(OTf)<sub>3</sub> (>99%), Ni(OTf)<sub>2</sub> (>96%), Mg(OTf)<sub>2</sub> (98%), Ni(ClO<sub>4</sub>)<sub>2</sub>·6H<sub>2</sub>O (98%), Pd(PPh<sub>3</sub>)<sub>4</sub> (99%) and TEMPO (98%) were purchased from Aldrich and used as received. Methanol, dichloromethane, toluene and acetonitrile were dried prior as per the standard procedure. Diaziridines and DA aziridines were prepared according to the reported procedure.<sup>1,2</sup> Merck silica gel G/GF254 plates were used for analytical TLC and Rankem silica gel (60-120 mesh) was utilized for column chromatography. NMR spectra were recorded with Bruker Avance III 600, 500 and 400 MHz instruments using CDCl<sub>3</sub> as solvent and Me<sub>4</sub>Si as an internal standard. Chemical shifts (δ) and spin-spin coupling constant (*J*) are reported in ppm and in Hz, respectively, and to describe peak patterns following abbreviations were used when appropriate: s = singlet, d = doublet, t = triplet and m = multiplet. MestReNova software was used throughout the spectral analysis. Melting points were determined using a Büchi B-540 apparatus. FT-IR spectra were collected on Perkin Elmer IR instrument. Q-ToF ESI-MS instrument was used for recording mass spectra (model: 6546 LC/Q-TOF). Optical rotation was determined using a Rudolph Autopol I Automatic Polarimeter. HPLC analysis was carried out using Waters-2489 with Daicel Chiralcel OJ-H and Daicel Chiralpak AD using *iso*-propanol and hexane as eluent. Single crystal *X*-ray data was collected on a Bruker SMART APEX equipped with a CCD area detector using Mo/*K*α radiation and the structure was solved by direct method using SHELXT-2018/2 (Göttingen, Germany).

**Sample Preparation for Crystal Growth.** The compound **3am** was dissolved in minimum volume of acetonitrile and chloroform and kept at room temperature for slow evaporation (2 days). Needle shaped crystals were formed, which were then subjected to *X*-ray diffraction.

## Crystal Structure and Data of **3am**.

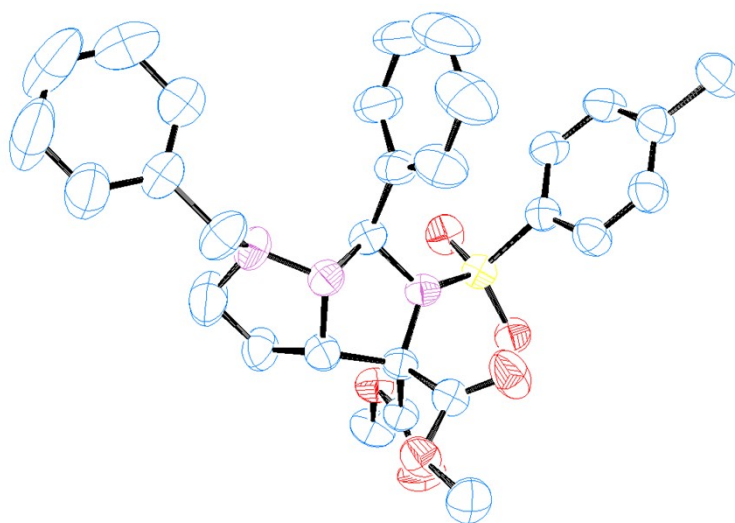

**Figure S1.** ORTEP diagram of Dimethyl 1-benzyl-6-phenyl-5-tosylhexahydro-4H-imidazo[1,5-*b*]pyrazole-4,4-dicarboxylate **3am** (CCDC No 2293903) with 50% ellipsoid. H-Atoms are omitted for clarity.

|                                  |                                                                                                                                                                  |
|----------------------------------|------------------------------------------------------------------------------------------------------------------------------------------------------------------|
| CCDC No.                         | 2293903                                                                                                                                                          |
| Identification code              | <b>3am</b>                                                                                                                                                       |
| Empirical formula                | C <sub>29</sub> H <sub>31</sub> N <sub>3</sub> O <sub>6</sub> S                                                                                                  |
| Formula weight                   | 549.63                                                                                                                                                           |
| Crystal habit, colour            | Needle, Colourless                                                                                                                                               |
| Temperature, <i>T</i> /K         | 297K                                                                                                                                                             |
| Wavelength, $\lambda/\text{\AA}$ | 0.71073 $\text{\AA}$                                                                                                                                             |
| Crystal system                   | Triclinic                                                                                                                                                        |
| Space group                      | P -1                                                                                                                                                             |
| Unit cell dimensions             | $a = 8.2702(12) \text{\AA}$<br>$b = 12.5620(19) \text{\AA}$<br>$c = 13.769(2) \text{\AA}$<br>$\alpha = 89.503(4)$<br>$\beta = 79.822(4)$<br>$\gamma = 87.707(4)$ |
| Volume, $V/\text{\AA}^3$         | 1406.8(4) $\text{\AA}^3$                                                                                                                                         |
| <i>Z</i>                         | 2                                                                                                                                                                |

|                                                     |                                                             |
|-----------------------------------------------------|-------------------------------------------------------------|
| Calculated density, Mg·m <sup>-3</sup>              | 1.298                                                       |
| Absorption coefficient, μ/mm <sup>-1</sup>          | 0.162                                                       |
| <i>F</i> (000)                                      | 580                                                         |
| <i>θ</i> range for data collection                  | 26.06                                                       |
| Limiting indices                                    | -9 ≤ <i>h</i> ≤ 9, -14 ≤ <i>k</i> ≤ 14, -16 ≤ <i>l</i> ≤ 16 |
| Reflection collected / unique                       | 4913/3926                                                   |
| Completeness to <i>θ</i>                            | 99.3 %                                                      |
| Absorption correction                               | Multi-scan                                                  |
| Refinement method                                   | 'SHELXL-2019/1 (Sheldrick, 2019)'                           |
| Data / restraints / parameters                      | 4913/ 0 / 356                                               |
| Goodness-of-fit on <i>F</i> <sup>2</sup>            | 1.14                                                        |
| Final <i>R</i> indices [ <i>I</i> > 2σ( <i>I</i> )] | <i>R</i> 1 = 0.0456, <i>wR</i> 2 = 0.1126                   |
| <i>R</i> indices (all data)                         | <i>R</i> 1 = 0.0621, <i>wR</i> 2 = 0.1345                   |

**Table S1. Optimization of Reaction Conditions<sup>a</sup>**

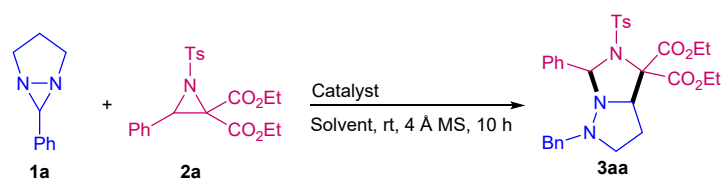

| Entry | Catalyst                                              | Solvent                           | Yield (%) <sup>b</sup> |
|-------|-------------------------------------------------------|-----------------------------------|------------------------|
| 1     | Sc(OTf) <sub>3</sub>                                  | toluene                           | 51                     |
| 2     | Zn(OTf) <sub>2</sub>                                  | toluene                           | 80                     |
| 3     | Ni(OTf) <sub>2</sub>                                  | toluene                           | 38                     |
| 4     | Yb(OTf) <sub>3</sub>                                  | toluene                           | 25                     |
| 5     | Mg(OTf) <sub>2</sub>                                  | toluene                           | 20                     |
| 6     | Ni(ClO <sub>4</sub> ) <sub>2</sub> ·6H <sub>2</sub> O | toluene                           | 35                     |
| 7     | Zn(OAc) <sub>2</sub>                                  | toluene                           | 42                     |
| 8     | ZnBr <sub>2</sub>                                     | toluene                           | 21                     |
| 8     | ZnCl <sub>2</sub>                                     | toluene                           | 30                     |
| 10    | Zn(OTf) <sub>2</sub>                                  | THF                               | trace                  |
| 11    | Zn(OTf) <sub>2</sub>                                  | CH <sub>3</sub> CN                | trace                  |
| 12    | Zn(OTf) <sub>2</sub>                                  | MeOH                              | 12                     |
| 13    | Zn(OTf) <sub>2</sub>                                  | (CH <sub>2</sub> Cl) <sub>2</sub> | 32                     |

|                 |                      |         |       |
|-----------------|----------------------|---------|-------|
| 14              | Zn(OTf) <sub>2</sub> | DMSO    | trace |
| 15              | PTSA                 | toluene | n.d.  |
| 16 <sup>d</sup> | Zn(OTf) <sub>2</sub> | toluene | 39    |

<sup>a</sup>Reaction conditions: **1a** (0.1 mmol), **2a** (0.12 mmol), catalyst (10 mol %), solvent (1 mL), rt, 10 h. <sup>b</sup>Isolated yield, <sup>c</sup>At 60 °C, n.d.= not detected.

### General Procedure for the Preparation of Diaziridines.<sup>1</sup>

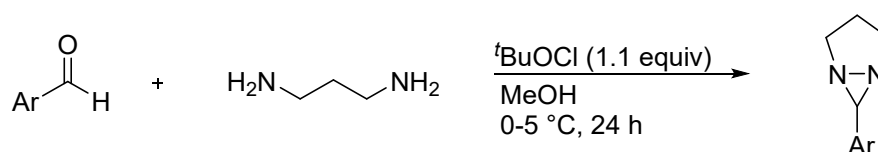

To a solution of 1,3-diaminopropane (148 mg, 2 mmol) in MeOH (10 mL), <sup>t</sup>BuOCl (118 mg, 1.1 mmol) in MeOH (1 mL) was added dropwise under stirring at 0 to 5 °C. Then, the aldehyde (1 mmol) in MeOH (2 mL) was added and the reaction was continued for 24 h at 0 to 5 °C under N<sub>2</sub> atmosphere. After completion of the reaction, the solvent was evaporated under vacuum and the residue was dissolved with CHCl<sub>3</sub> (10 mL). Then the solution was washed with water and dried over Na<sub>2</sub>SO<sub>4</sub>. Evaporation of the solvent gave a residue that was purified by using silica gel chromatography to afford the corresponding diaziridines.

### General Procedure for the Preparation of DA Aziridines.<sup>2</sup>

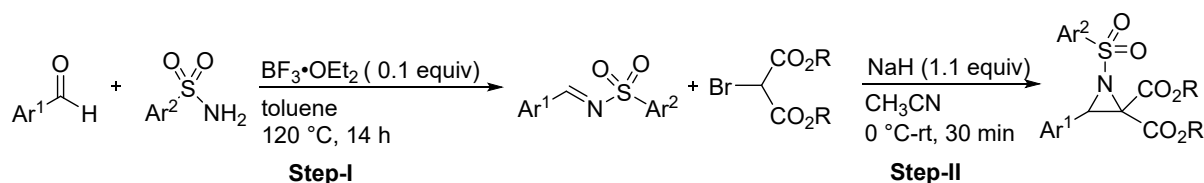

**Step-I:** To the stirred solution of arylsulfonamide (3 mmol) and aldehyde (3.3 mmol) in toluene (10 mL), BF<sub>3</sub>·Et<sub>2</sub>O (43 mg, 0.3 mmol) was added. The flask was equipped with a dean-stark trap, which was attached to a reflux condenser. The reaction mixture was stirred at 120 °C for 14 h under N<sub>2</sub> atmosphere. After completion of the reaction, the resulting reaction mixture was concentrated under vacuum to afford the corresponding imine.

**Step-II:** To a suspension of NaH (88 mg, 2.2 mmol, 60 % dispersion in mineral oil), 2-bromomalonate (2.2 mmol) and imine solution (2 mmol) (obtained by **step-I**) were added in CH<sub>3</sub>CN (20 mL) under N<sub>2</sub> atmosphere at 0 °C. The resulting mixture was stirred at room temperature for 30 minutes. After completion, the mixture was filtered through a short pad of silica gel using EtOAc (40 mL). Evaporation of the solvent gave a residue that was purified by silica gel chromatography to afford the corresponding aziridines.

**General Procedure for the Annulation of Diaziridines with DA Aziridines.** Diaziridine **1** (0.1 mmol), DA aziridine **2** (0.12 mmol), Zn(OTf)<sub>2</sub> (3.62 mg, 0.01 mmol) and 4 Å molecular sieves (100 mg) were stirred in toluene (2 mL) at room temperature for 10 h. After completion, the reaction mixture was diluted with EtOAc (5 mL) and passed through a short pad of celite using EtOAc (10 mL). Evaporation of the solvent gave a residue that was purified on silica gel column chromatography to afford the corresponding annulated **3**.

**Synthesis of 1-Benzyl-4,5-dihydro-1H-pyrazole II.**<sup>3</sup> To a stirred solution of diaziridine **1a** (32 mg, 0.2 mmol) in toluene (3 mL), Zn(OTf)<sub>2</sub> (3.62 mg, 0.01 mmol) was added. The reaction was allowed to stir at room temperature for 8 h. Then, the suspension was diluted using EtOAc (5 mL) and passed through a short pad of celite using EtOAc (10 mL). Evaporation of the solvent gave a residue that was purified on silica gel column chromatography (hexane/ethyl acetate = 7:3) to afford **II** in 87% yield (28 mg).

**Scale-up Synthesis of 3am.** Diaziridine **1a** (480 mg, 3 mmol), DA aziridine **2m** (1.5 g, 3.6 mmol), Zn(OTf)<sub>2</sub> (108 mg, 0.3 mmol) and 4 Å molecular sieves (3 g) in toluene (10 mL) were stirred at room temperature for 12 h. Then, the reaction mixture was diluted with EtOAc (15 mL) and passed through a short pad of celite using EtOAc (20 mL). Evaporation of the solvent gave a residue that was purified on silica gel column chromatography (hexane/ethyl acetate = 4:1) to give **3am** in 65% yield (1.07 g).

### Procedures for the Post-Synthetic Modifications

**Synthesis of 4.**<sup>4</sup> To a stirred solution of **3am** (55 mg, 0.1 mmol) in CH<sub>3</sub>CN:H<sub>2</sub>O (1:1, 4 mL), aqueous 2 M NaOH (0.2 mL) was added dropwise at 0 °C and then allowed to stir at room temperature for 1 h. After completion (monitored by TLC), the reaction mixture was acidified using 2 M HCl, and extracted using ethyl acetate (10 mL). The combined organic layer was dried over Na<sub>2</sub>SO<sub>4</sub>. Evaporation of the solvent gave a residue that was purified using silica gel chromatography (hexane/ethyl acetate = 7:3) to afford **4** in 72% (35 mg) yield.

**Synthesis of 5.** To a stirred solution of **3am** (55 mg, 0.1 mmol) in THF (4 mL), LiAlH<sub>4</sub> (11 mg, 0.3 mmol) was added portion wise under N<sub>2</sub> flow over 5 min at 0 °C. Then, it was slowly warmed to room temperature and allowed to stir for 3 h. After completion (monitored by TLC), the reaction mixture was diluted with ethyl acetate (10 mL), washed with aqueous NH<sub>4</sub>Cl. The combined organic layer was dried over Na<sub>2</sub>SO<sub>4</sub>. Evaporation of the solvent gave a residue that was purified using silica gel chromatography (hexane/ethyl acetate = 3:2) to afford **5** in 82% (40 mg) yield.

**Synthesis of 6<sup>5</sup>.** To a stirred solution of **3af** (55 mg, 0.1 mmol) in toluene:ethanol (1:1, 4 mL), Pd(PPh<sub>3</sub>)<sub>4</sub> (4 mg, 0.003 mmol), phenylboronic acid (18 mg, 0.1 mmol), Na<sub>2</sub>CO<sub>3</sub> (22 mg, 0.2 mmol) and H<sub>2</sub>O (0.05 mL) were added and allowed to stir at 90 °C for 12 h under N<sub>2</sub> atmosphere. After completion (monitored by TLC), the reaction mixture was cooled to room temperature, diluted with ethyl acetate (10 mL), washed with water (5 mL) and dried over Na<sub>2</sub>SO<sub>4</sub>. Evaporation of the solvent gave a residue that was purified using silica gel chromatography (hexane/ethyl acetate = 4:1) to afford **6** in 78% (51 mg) yield.

**Procedure for the Preparation of DA Aziridine 2h'.<sup>6</sup>**

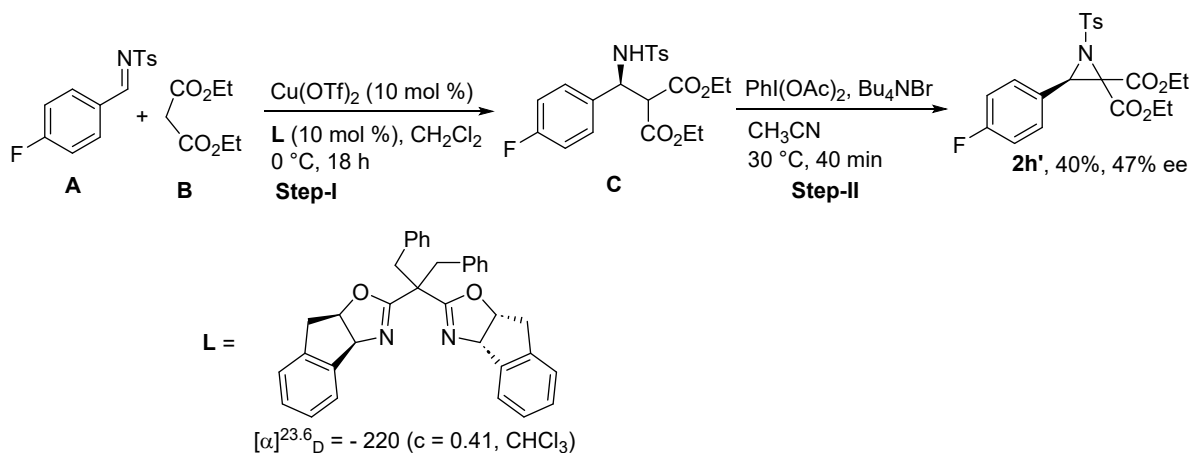

**Step-I:** Cu(OTf)<sub>2</sub> (72 mg, 0.2 mmol) and **L** (102 mg, 0.2 mmol) were stirred CH<sub>2</sub>Cl<sub>2</sub> (8 ml) for 2 h at room temperature under nitrogen atmosphere. Then imine **A** (664 mg, 2.4 mmol) was added followed by the diethylmalonate **B** (320 mg, 2 mmol) and the resulting mixture was stirred for an additional 18 h at 0 °C under N<sub>2</sub> atmosphere. The reaction mixture was diluted with CH<sub>2</sub>Cl<sub>2</sub> (10 mL) and passed through a short pad of celite using CH<sub>2</sub>Cl<sub>2</sub> (20 mL). Evaporation of the solvent gave a residue that was purified on silica gel column chromatography (hexane/ethyl acetate = 5:1) to afford *N*-Ts-β-amino ester **C** in 65% (328 mg) yield.

**Step-II:** To a stirred solution of **C** (217 mg, 0.5 mmol) (obtained by **step-I**) in CH<sub>3</sub>CN (3 mL), PhI(OAc)<sub>2</sub> (322 mg, 1 mmol) and Bu<sub>4</sub>NBr (322 mg, 1 mmol) were added and allowed to stir for 40 min at room temperature under N<sub>2</sub> atmosphere. The reaction mixture was diluted with EtOAc (10 mL) and passed through a short pad of celite using EtOAc (15 mL). Evaporation of the solvent gave a residue that was purified on silica gel column chromatography (hexane/ethyl acetate = 5:1) to furnish **2h'** in 40% (86 mg) yield.

**Preparation of 3ah' using 2h'.** Diaziridine **1** (16 mg, 0.1 mmol), DA aziridine **2h'** (52 mg, 0.12 mmol), Zn(OTf)<sub>2</sub> (3.62 mg, 0.01 mmol) and 4 Å molecular sieves (100 mg) were stirred

in toluene (2 mL) for 10 h at room temperature. The reaction mixture was diluted with EtOAc (5 mL) and passed through a short pad of celite using EtOAc (10 mL). Evaporation of the solvent gave a residue that was purified on silica gel column chromatography to afford **3ah'** in 70% (42 mg) yield.

## HPLC Chromatogram

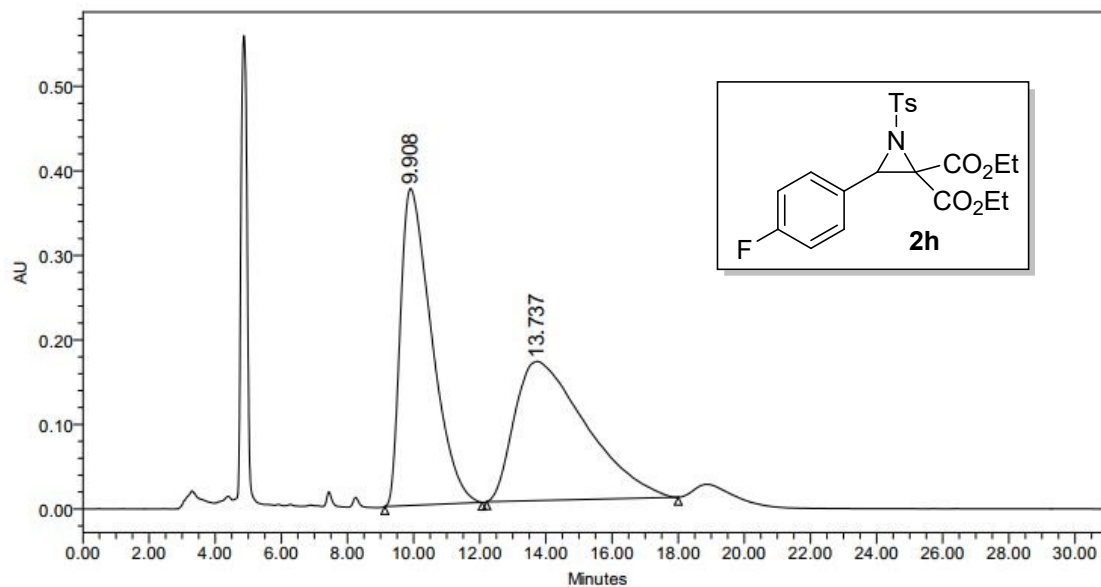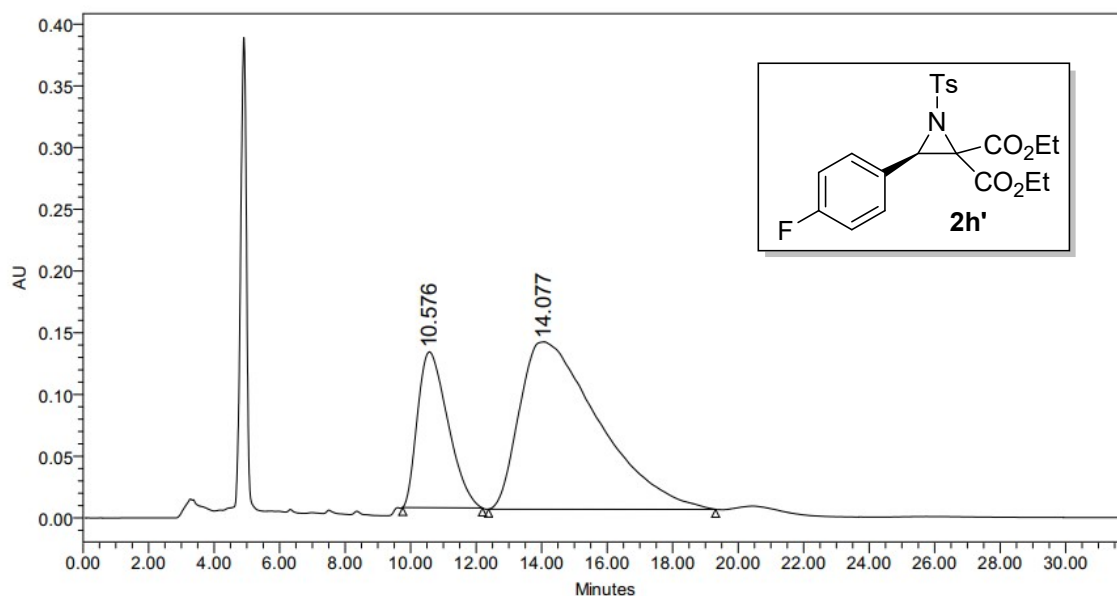



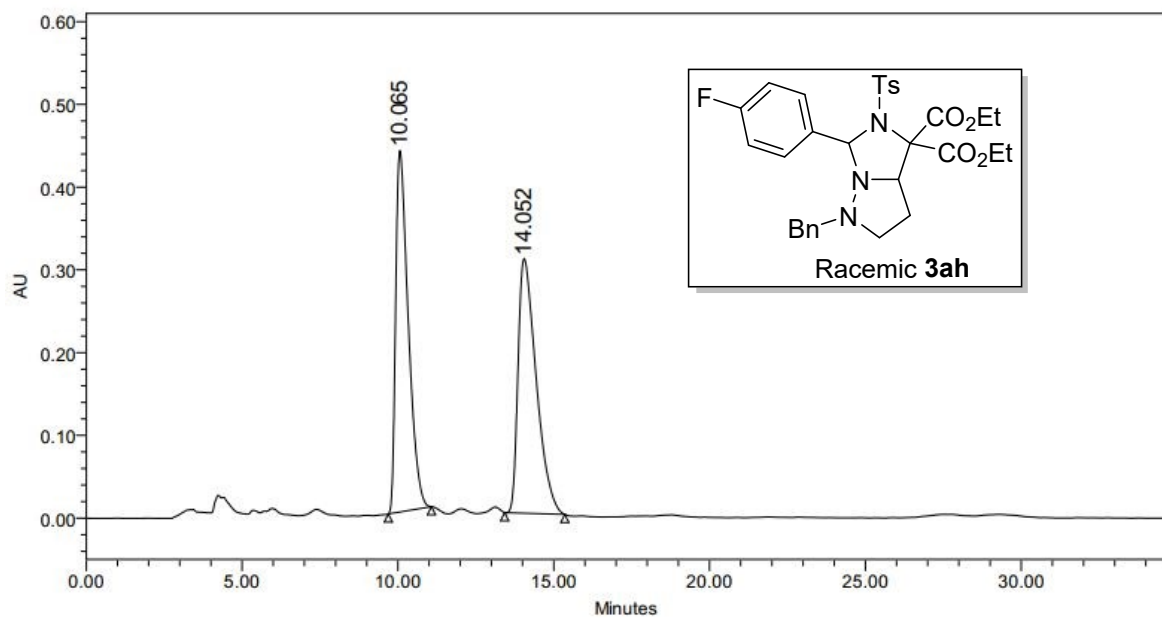

|   | RT     | Area     | % Area | Height |
|---|--------|----------|--------|--------|
| 1 | 10.065 | 12236920 | 49.64  | 436497 |
| 2 | 14.052 | 12414465 | 50.36  | 307570 |

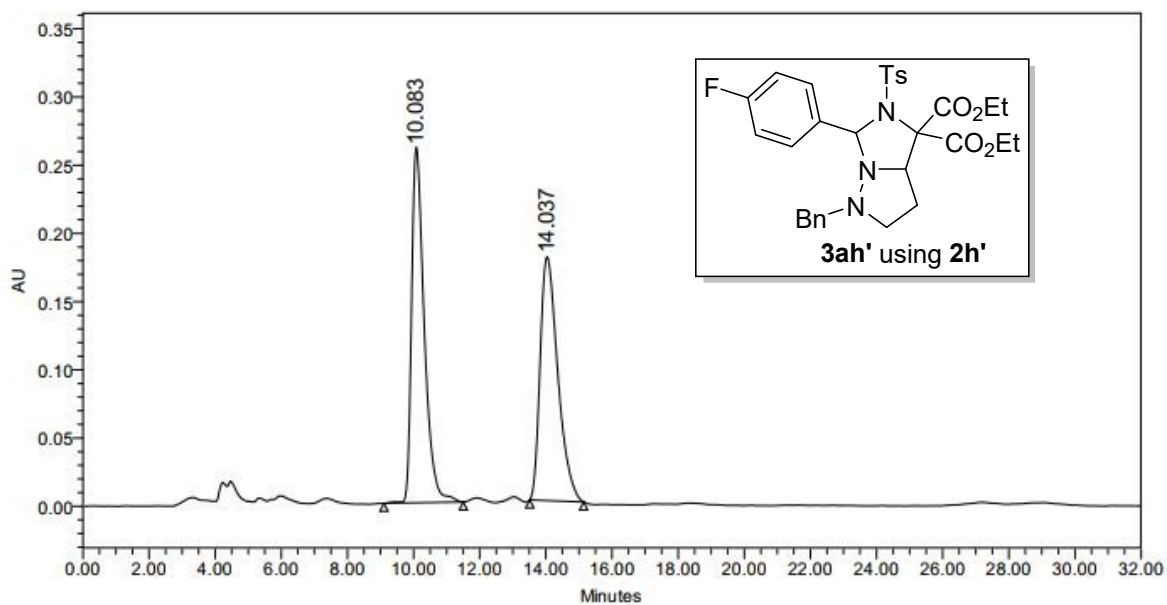

|   | RT     | Area    | % Area | Height |
|---|--------|---------|--------|--------|
| 1 | 10.083 | 6930396 | 51.15  | 260438 |
| 2 | 14.037 | 6619063 | 48.85  | 178525 |

## Characterization Data of the Products

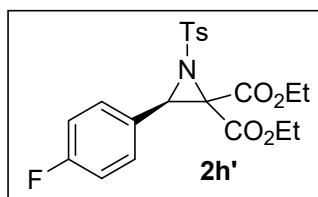

Diethyl

(*R*)-3-(4-fluorophenyl)-1-tosylaziridine-2,2-di-

carboxylate **2h'**. Analytical TLC on silica gel, 1:5 ethyl acetate/hexane  $R_f = 0.43$ ; Colourless liquid; yield 40% (86 mg);  $^1\text{H NMR}$  (600 MHz,  $\text{CDCl}_3$ )  $\delta$  7.97 (d,  $J = 7.8$  Hz, 2H), 7.36 (d,  $J = 7.8$  Hz, 2H), 7.24 (m, 4H), 4.89 (s, 1H), 4.40-4.38 (q,  $J = 4.2$  Hz, 2H), 3.95 (q,  $J = 7.2$  Hz, 2H), 2.44 (s, 3H), 1.37 (t,  $J = 7.2$  Hz, 3H), 0.88 (t,  $J = 7.2$  Hz, 3H).  $[\alpha]_D^{21.8} = -2.67$  ( $c = 0.15$ ,  $\text{CH}_2\text{Cl}_2$ ); HPLC: 47% *ee* [CHIRALCEL OJ-H, hexane/*i*PrOH = 70:30, flow rate: 1 mL/min,  $\lambda = 254$  nm,  $t_R = 10.57$  min (minor), 14.07 min (major)].

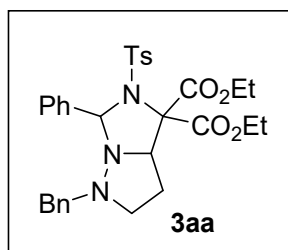

Diethyl

1-benzyl-6-phenyl-5-tosylhexahydro-4H-imidazo[1,5-

*b*]pyrazole-4,4-dicarboxylate **3aa**. Analytical TLC on silica gel, 1:4 ethyl acetate/hexane  $R_f = 0.47$ ; pale yellow thick liquid; yield 80% (46 mg);  $^1\text{H NMR}$  (400 MHz,  $\text{CDCl}_3$ )  $\delta$  7.31 (d,  $J = 8.0$  Hz, 2H), 7.14-7.13 (m, 5H), 7.10 (d,  $J = 7.2$  Hz, 1H), 7.05-7.04 (m, 2H), 6.98 (t,  $J = 7.2$  Hz, 2H), 6.90 (d,  $J = 8.4$  Hz, 2H), 5.42 (s, 1H), 4.49-4.43 (m, 1H), 4.41-4.33 (m, 4H), 3.67 (d,  $J = 12.4$  Hz, 1H), 3.38 (d,  $J = 12.8$  Hz, 1H), 3.23-3.17 (m, 1H), 2.63-2.57 (m, 1H), 2.54-2.45 (m, 1H), 2.28 (s, 3H), 2.17-2.09 (d,  $J = 18.3$  Hz, 1H), 1.42-1.38 (m, 6H);  $^{13}\text{C NMR}$  (150 MHz,  $\text{CDCl}_3$ )  $\delta$  168.6, 167.3, 142.7, 138.0, 137.8, 137.1, 129.6, 129.2, 128.5, 128.4, 128.3, 128.1, 127.7, 127.1, 84.7, 76.1, 68.8, 63.0, 62.84, 62.80, 52.6, 28.3, 21.6, 14.2, 14.0; FT-IR (neat) 2982, 2929, 1750, 1456, 1344, 1263, 1158, 1090, 699, 581  $\text{cm}^{-1}$ ; HRMS (ESI-TOF)  $m/z$   $[\text{M}+\text{H}]^+$  calcd for  $\text{C}_{31}\text{H}_{36}\text{N}_3\text{O}_6\text{S}$ : 578.2319; Found 578.2310.

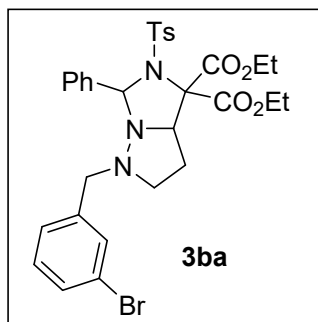

Diethyl

1-(3-bromobenzyl)-6-phenyl-5-tosylhexahydro-4H-

imidazo[1,5-*b*]pyrazole-4,4-dicarboxylate **3ba**. Analytical TLC on silica gel, 1:4 ethyl

acetate/hexane  $R_f = 0.47$ ; thick liquid; yield 62% (41 mg);  $^1\text{H NMR}$  (600 MHz,  $\text{CDCl}_3$ )  $\delta$  7.27-7.26 (m, 3H), 7.22 (d,  $J = 7.8$  Hz, 1H), 7.14 (s, 1H), 7.09-7.07 (m, 1H), 7.06 (d,  $J = 7.2$  Hz, 2H), 6.95 (t,  $J = 7.8$  Hz, 2H), 6.92-6.91 (m, 1H), 6.89 (d,  $J = 7.8$  Hz, 2H), 5.34 (s, 1H), 4.49-4.44 (m, 1H), 4.41-4.36 (m, 4H), 3.57 (d,  $J = 12.6$  Hz, 1H), 3.34 (d,  $J = 12.6$  Hz, 1H), 3.30-3.26 (m, 1H), 2.65-2.61 (m, 1H), 2.55-2.41 (m, 1H), 2.28 (s, 3H), 2.21-2.16 (m, 1H), 1.43-1.38 (m, 6H);  $^{13}\text{C NMR}$  (100 MHz,  $\text{CDCl}_3$ )  $\delta$  168.6, 167.2, 142.7, 140.4, 138.0, 136.9, 132.3, 130.2, 129.9, 129.7, 129.6, 128.6, 128.4, 127.8, 127.7, 122.1, 84.7, 76.1, 68.4, 62.8, 62.6, 53.0, 31.4, 28.7, 21.5, 14.3, 14.1; FT-IR (neat) 2958, 2923, 1747, 1457, 1344, 1235, 1157, 1091, 646, 554  $\text{cm}^{-1}$ ; HRMS (ESI-TOF)  $m/z$   $[\text{M}+\text{H}]^+$  calcd for  $\text{C}_{31}\text{H}_{35}\text{BrN}_3\text{O}_6\text{S}$ : 656.1424; Found 656.1441.

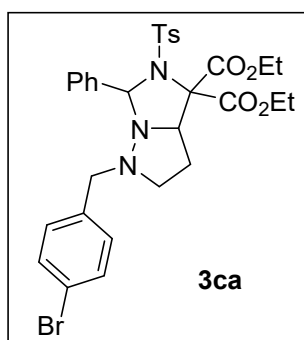

**Diethyl 1-benzyl-6-(4-bromophenyl)-5-tosylhexahydro-4H-imidazo[1,5-b]pyrazole-4,4-dicarboxylate 3ca.** Analytical TLC on silica gel, 1:4 ethyl acetate/hexane  $R_f = 0.47$ ; thick liquid; yield 70% (45 mg);  $^1\text{H NMR}$  (500 MHz,  $\text{CDCl}_3$ )  $\delta$  7.34 (d,  $J = 8.0$  Hz, 2H), 7.13-7.05 (m, 3H), 7.00-6.92 (m, 6H), 6.89 (d,  $J = 8.5$  Hz, 2H), 5.25 (s, 1H), 4.49-4.43 (m, 1H), 4.41-4.31 (m, 4H), 3.55 (d,  $J = 12.5$  Hz, 1H), 3.40 (d,  $J = 12.5$  Hz, 1H), 3.31-3.26 (m, 1H), 2.69-2.64 (m, 1H), 2.54-2.47 (m, 1H), 2.33 (s, 3H), 2.19-2.13 (m, 1H), 1.42-1.38 (m, 6H);  $^{13}\text{C NMR}$  (150 MHz,  $\text{CDCl}_3$ )  $\delta$  168.6, 167.1, 143.2, 137.9, 137.8, 136.1, 131.5, 130.6, 129.2, 128.6, 128.5, 128.0, 127.0, 122.6, 83.8, 75.9, 68.2, 63.1, 62.9, 62.8, 52.9, 28.8, 21.6, 14.3, 14.0; FT-IR (neat) 2962, 2929, 1746, 1456, 1344, 1263, 1158, 1091, 699, 582  $\text{cm}^{-1}$ ; HRMS (ESI-TOF)  $m/z$   $[\text{M}+\text{H}]^+$  calcd for  $\text{C}_{31}\text{H}_{35}\text{BrN}_3\text{O}_6\text{S}$ : 656.1424; Found 656.1426.

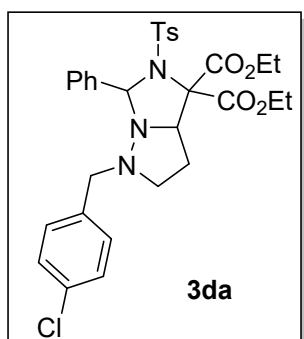

**Diethyl 1-(4-chlorobenzyl)-6-phenyl-5-tosylhexahydro-4H-imidazo[1,5-b]pyrazole-4,4-dicarboxylate 3da.** Analytical TLC on silica gel, 1:4 ethyl acetate/hexane  $R_f = 0.47$ ; thick liquid; yield 74% (47 mg);  $^1\text{H NMR}$  (400 MHz,  $\text{CDCl}_3$ )  $\delta$  7.31 (d,  $J = 8.4$  Hz, 2H), 7.14-7.13 (m, 4H), 7.10 (d,  $J = 7.6$  Hz, 1H), 7.05-7.03 (m, 2H), 6.97 (t,  $J$

= 7.6 Hz, 2H), 6.90 (d,  $J = 8.4$  Hz, 2H), 5.41 (s, 1H), 4.47-4.43 (m, 1H), 4.40- 4.33 (m, 4H), 3.66 (d,  $J = 12.8$  Hz, 1H), 3.38 (d,  $J = 12.8$  Hz, 1H), 3.23-3.17 (m, 1H), 2.63-2.57 (m, 1H), 2.54-2.45 (m, 1H), 2.28 (s, 3H), 2.17-2.08 (m, 1H), 1.42-1.37 (m, 6H);  $^{13}\text{C}$  NMR (150 MHz,  $\text{CDCl}_3$ )  $\delta$  168.6, 167.3, 142.7, 138.1, 137.9, 137.2, 129.7, 129.3, 128.6, 128.4, 128.3, 128.1, 127.7, 127.1, 84.8, 76.2, 68.8, 63.1, 62.8, 62.7, 52.7, 28.4, 21.5, 14.2, 14.0; FT-IR (neat) 2963, 2925, 1744, 1455, 1344, 1265, 1158, 1091, 700, 581  $\text{cm}^{-1}$ ; HRMS (ESI-TOF)  $m/z$   $[\text{M}+\text{Na}]^+$  calcd for  $\text{C}_{31}\text{H}_{34}\text{ClN}_3\text{O}_6\text{SNa}$ : 634.1749; Found 634.1751.

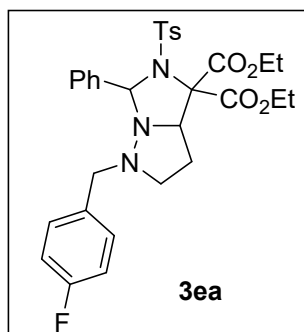

**Diethyl 1-(4-fluorobenzyl)-6-phenyl-5-tosylhexa-hydro-4H-**

**imidazo[1,5-*b*]pyrazole-4,4-dicarboxylate 3ea.** Analytical TLC on silica gel, 1:4 ethyl acetate/hexane  $R_f = 0.47$ ; thick liquid; yield 66% (39 mg);  $^1\text{H}$  NMR (500 MHz,  $\text{CDCl}_3$ )  $\delta$  7.31 (d,  $J = 8.0$  Hz, 2H), 7.14-7.13 (m, 4H), 7.11-7.08 (m, 1H), 7.05-7.04 (m, 2H), 6.98 (t,  $J = 7.5$  Hz, 2H), 6.90 (d,  $J = 8.0$  Hz, 2H), 5.41 (s, 1H), 4.46-4.41 (m, 1H), 4.39-4.33 (m, 4H), 3.66 (d,  $J = 12.5$  Hz, 1H), 3.37 (d,  $J = 12.5$  Hz, 1H), 3.23-3.18 (m, 1H), 2.63-2.58 (m, 1H), 2.53-2.47 (m, 1H), 2.28 (s, 3H), 2.16-2.11 (m, 1H), 1.42-1.37 (m, 6H);  $^{13}\text{C}$  NMR (150 MHz,  $\text{CDCl}_3$ )  $\delta$  168.6, 167.2, 142.7, 138.1, 137.9, 137.2, 131.5 ( $J_{\text{C-F}} = 237.0$ ), 129.9, 129.7, 129.3, 128.8 ( $J_{\text{C-F}} = 3.7$ ), 128.7, 128.6, 128.4, 128.3, 128.1, 127.7, 127.1, 84.8, 76.2, 68.8, 63.1, 62.8, 62.7, 52.7, 28.4, 21.5, 14.2, 14.1;  $^{19}\text{F}$  NMR (377 MHz,  $\text{CDCl}_3$ )  $\delta$  -114.22; FT-IR (neat) 2960, 2918, 1746, 1455, 1344, 1265, 1158, 1091, 700, 579  $\text{cm}^{-1}$ ; HRMS (ESI-TOF)  $m/z$   $[\text{M}+\text{H}]^+$  calcd for  $\text{C}_{31}\text{H}_{35}\text{FN}_3\text{O}_6\text{S}$ : 596.2225; Found 596.2238.

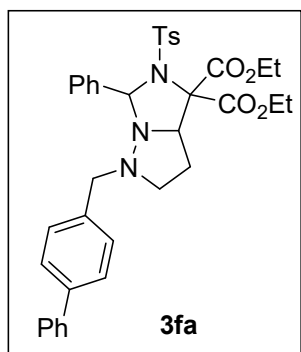

**Diethyl 1-([1,1'-biphenyl]-4-ylmethyl)-6-phenyl-5-**

**tosylhexahydro-4H-imidazo[1,5-*b*]pyrazole-4,4-dicarboxylate 3fa.** Analytical TLC on silica gel, 1:4 ethyl acetate/hexane  $R_f = 0.47$ ; thick liquid; yield 72% (47 mg);  $^1\text{H}$  NMR (500 MHz,  $\text{CDCl}_3$ )  $\delta$  7.48-7.43 (m, 4H), 7.37-7.33 (m, 3H), 7.13 (s, 4H), 7.10-7.09 (m, 3H), 7.05-

7.03 (m, 2H), 6.86 (d,  $J = 8.5$  Hz, 2H), 5.43 (s, 1H), 4.51-4.44 (m, 1H), 4.42-4.34 (m, 4H), 3.68 (d,  $J = 12.5$  Hz, 1H), 3.42 (d,  $J = 12.5$  Hz, 1H), 3.29-3.24 (m, 1H), 2.68-2.63 (m, 1H), 2.58-2.51 (m, 1H), 2.20 (s, 3H), 2.17-2.13 (m, 1H), 1.43-1.39 (m, 6H);  $^{13}\text{C}$  NMR (100 MHz,  $\text{CDCl}_3$ )  $\delta$  168.6, 167.2, 142.6, 141.3, 141.2, 138.2, 137.9, 136.1, 130.1, 129.3, 128.9, 128.6, 128.4, 128.0, 127.4, 127.2, 127.0, 126.4, 84.4, 76.1, 68.8, 63.1, 62.84, 62.80, 52.9, 28.5, 21.5, 14.3, 14.0; FT-IR (KBr) 2981, 2929, 1747, 1487, 1456, 1344, 1265, 1157, 1091, 698, 580  $\text{cm}^{-1}$ ; HRMS (ESI-TOF)  $m/z$   $[\text{M}+\text{H}]^+$  calcd for  $\text{C}_{37}\text{H}_{40}\text{N}_3\text{O}_6\text{S}$ : 654.2632; Found 654.2632.

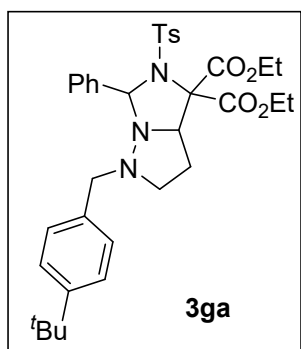

**Diethyl 1-(4-(*tert*-butyl)benzyl)-6-phenyl-5-tosylhexa-hydro-4H-**

**imidazo[1,5-*b*]pyrazole-4,4-dicarboxylate 3ga.** Analytical TLC on silica gel, 1:3 ethyl acetate/hexane  $R_f = 0.45$ ; yellow solid; mp 123-124  $^\circ\text{C}$ ; yield 62% (39 mg);  $^1\text{H}$  NMR (600 MHz,  $\text{CDCl}_3$ )  $\delta$  7.30 (d,  $J = 8.4$  Hz, 2H), 7.13 (t,  $J = 7.8$  Hz, 4H), 7.08 (t,  $J = 7.2$  Hz, 1H), 6.97-6.94 (m, 4H), 6.89 (d,  $J = 8.4$  Hz, 2H), 5.40 (s, 1H), 4.46-4.42 (m, 1H), 4.40-4.34 (m, 4H), 3.61 (d,  $J = 12.6$  Hz, 1H), 3.35 (d,  $J = 12.6$  Hz, 1H), 3.24-3.20 (m, 1H), 2.63-2.59 (m, 1H), 2.51-2.45 (m, 1H), 2.28 (s, 3H), 2.17-2.13 (m, 1H), 1.42-1.37 (m, 6H), 1.26 (s, 9H);  $^{13}\text{C}$  NMR (150 MHz,  $\text{CDCl}_3$ )  $\delta$  168.6, 167.3, 149.9, 142.6, 138.2, 137.3, 135.0, 129.8, 128.9, 128.6, 128.4, 128.3, 127.7, 125.0, 84.9, 76.2, 68.7, 62.8, 62.7, 52.8, 34.5, 31.5, 28.6, 21.5, 14.3, 14.0; FT-IR (neat) 2952, 2926, 1743, 1454, 1343, 1269, 1155, 1088, 699, 578  $\text{cm}^{-1}$ ; HRMS (ESI-TOF)  $m/z$   $[\text{M}+\text{H}]^+$  calcd for  $\text{C}_{35}\text{H}_{44}\text{N}_3\text{O}_6\text{S}$ : 634.2945; Found 634.2945.

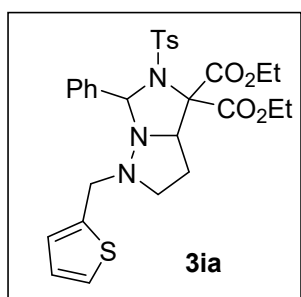

**Diethyl 6-phenyl-1-(thiophen-2-ylmethyl)-5-tosylhexahydro-4H-**

**imidazo[1,5-*b*]pyrazole-4,4-dicarboxylate 3ia.** Analytical TLC on silica gel, 1:4 ethyl acetate/hexane  $R_f = 0.47$ ; thick liquid; yield 65% (37 mg);  $^1\text{H}$  NMR (500 MHz,  $\text{CDCl}_3$ )  $\delta$  7.32 (d,  $J = 8.5$  Hz, 2H), 7.22 (d,  $J = 7.0$  Hz, 2H), 7.13-7.06 (m, 2H), 7.02 (t,  $J = 7.5$  Hz, 2H), 6.90 (d,  $J = 8.0$  Hz, 2H), 6.82-6.81 (m, 1H), 6.71-6.70 (m, 1H), 5.39 (s, 1H), 4.46-4.34 (m, 4H),

4.22 (t,  $J = 7.5$  Hz, 1H), 3.69-3.66 (m, 1H), 3.58-3.56 (m, 1H), 3.29-3.25 (m, 1H), 2.71-2.66 (m, 1H), 2.55-2.48 (m, 1H), 2.28 (s, 3H), 2.05-1.98 (m, 1H), 1.42-1.37 (m, 6H);  $^{13}\text{C}$  NMR (150 MHz,  $\text{CDCl}_3$ )  $\delta$  168.5, 167.1, 142.7, 139.7, 138.1, 137.2, 130.0, 128.6, 128.5, 128.4, 127.8, 126.8, 126.1, 125.8, 85.1, 75.7, 68.7, 62.9, 62.7, 56.8, 52.0, 28.9, 21.5, 14.3, 14.1.; FT-IR (neat) 2981, 2924, 1743, 1456, 1343, 1265, 1157, 1089, 698, 579  $\text{cm}^{-1}$ ; HRMS (ESI-TOF)  $m/z$   $[\text{M}+\text{H}]^+$  calcd for  $\text{C}_{29}\text{H}_{34}\text{N}_3\text{O}_6\text{S}_2$ : 584.1884; Found 584.1896.

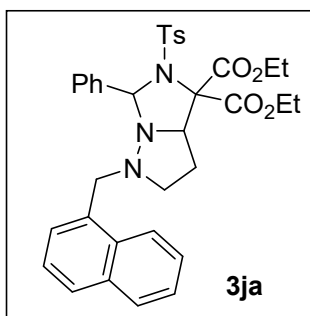

**Diethyl 1-(naphthalen-1-ylmethyl)-6-phenyl-5-tosylhexahydro-4H-imidazo[1,5-*b*] pyrazole-4,4-dicarboxylate 3ja.** Analytical TLC on silica gel, 1:4 ethyl acetate/hexane  $R_f = 0.48$ ; yellow solid; mp 126-127  $^\circ\text{C}$ ; yield 75% (48 mg);  $^1\text{H}$  NMR (400 MHz,  $\text{CDCl}_3$ )  $\delta$  7.72-7.65 (m, 2H), 7.53 (d,  $J = 8.4$  Hz, 1H), 7.37 (t,  $J = 7.2$  Hz, 1H), 7.32 (d,  $J = 8.0$  Hz, 2H), 7.24-7.19 (m, 4H), 7.17-7.14 (m, 2H), 7.05-7.01 (m, 2H), 6.91 (d,  $J = 7.6$  Hz, 2H), 5.37 (s, 1H), 4.52-4.35 (m, 5H), 4.17 (d,  $J = 12.0$  Hz, 1H), 3.69 (d,  $J = 12.0$  Hz, 1H), 3.11-3.05 (m, 1H), 2.79-2.73 (m, 1H), 2.53-2.45 (m, 1H), 2.28-2.23 (m, 4H), 1.43-1.36 (m, 6H);  $^{13}\text{C}$  NMR (100 MHz,  $\text{CDCl}_3$ )  $\delta$  168.6, 167.3, 142.6, 138.0, 137.2, 133.7, 133.6, 132.2, 130.2, 129.6, 129.2, 128.54, 128.52, 128.4, 128.3, 128.1, 128.0, 127.7, 127.6, 127.5, 125.7, 125.5, 125.1, 124.9, 84.4, 76.0, 67.8, 62.8, 62.7, 61.8, 52.2, 28.9, 21.5, 14.2, 14.0; FT-IR (neat) 2981, 2926, 1745, 1456, 1342, 1265, 1156, 1089, 670, 579  $\text{cm}^{-1}$ ; HRMS (ESI-TOF)  $m/z$   $[\text{M}+\text{Na}]^+$  calcd for  $\text{C}_{35}\text{H}_{37}\text{N}_3\text{O}_6\text{SNa}$ : 650.2295; Found 650.2320.

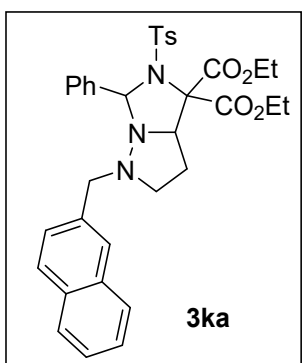

**Diethyl 1-(naphthalen-2-ylmethyl)-6-phenyl-5-tosylhexahydro-4H-imidazo[1,5-*b*] pyrazole-4,4-dicarboxylate 3ka.** Analytical TLC on silica gel, 1:4 ethyl acetate/hexane  $R_f = 0.48$ ; thick liquid; yield 68% (42 mg);  $^1\text{H}$  NMR (400 MHz,  $\text{CDCl}_3$ )  $\delta$  7.74-7.65 (m, 2H), 7.57 (d,  $J = 8.4$  Hz, 1H), 7.44-7.39 (m, 3H), 7.27 (s, 2H), 7.17 (d,  $J = 8.4$  Hz, 1H), 7.07-7.05 (m, 2H), 6.97 (t,  $J = 7.2$  Hz, 1H), 6.87-6.81 (m, 4H), 5.42 (s, 1H), 4.49-4.43 (m,

1H), 4.39-4.33 (m, 4H), 3.80 (d,  $J = 12.4$  Hz, 1H), 3.54 (d,  $J = 12.4$  Hz, 1H), 3.28-3.22 (m, 1H), 2.72-2.66 (m, 1H), 2.56-2.47 (m, 1H), 2.25 (s, 3H), 2.21-2.15 (m, 1H), 1.43-1.35 (m, 6H);  $^{13}\text{C}$  NMR (150 MHz,  $\text{CDCl}_3$ )  $\delta$  168.5, 167.1, 142.5, 137.9, 136.9, 135.4, 133.1, 132.7, 129.5, 128.4, 128.3, 128.1, 127.8, 127.7, 127.6, 127.5, 127.48, 127.43, 125.7, 125.5, 84.7, 76.0, 68.6, 63.1, 62.7, 62.6, 52.7, 28.4, 21.4, 14.1, 13.9; FT-IR (neat) 2979, 2926, 1746, 1456, 1343, 1265, 1157, 1090, 670, 583  $\text{cm}^{-1}$ ; HRMS (ESI-TOF)  $m/z$   $[\text{M}+\text{H}]^+$  calcd for  $\text{C}_{35}\text{H}_{38}\text{N}_3\text{O}_6\text{S}$ : 628.2476; Found 628.2477.

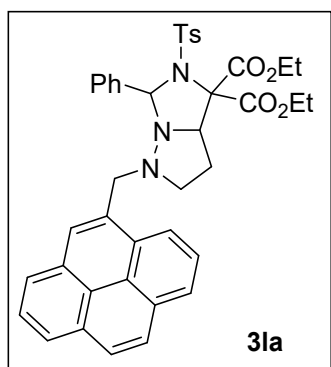

**Diethyl 6-phenyl-1-(pyren-4-ylmethyl)-5-tosylhexahydro-4H-imidazo[1,5-*b*]pyrazole-4,4-dicarboxylate 3la.** Analytical TLC on silica gel, 1:4 ethyl acetate/hexane  $R_f = 0.47$ ; yellow solid; mp 124-125  $^\circ\text{C}$ ; yield 57% (39 mg);  $^1\text{H}$  NMR (400 MHz,  $\text{CDCl}_3$ )  $\delta$  8.14 (d,  $J = 7.6$  Hz, 2H), 8.00-7.92 (m, 3H), 7.90-7.87 (m, 2H), 7.84-7.82 (m, 1H), 7.66 (d,  $J = 7.6$  Hz, 1H), 7.22 (d,  $J = 8.4$  Hz, 2H), 6.96 (d,  $J = 7.2$  Hz, 2H), 6.83 (d,  $J = 8.0$  Hz, 2H), 6.74-6.70 (m, 1H), 6.66-6.62 (m, 2H), 5.32 (s, 1H), 4.52-4.45 (m, 2H), 4.39-4.30 (m, 4H), 4.04 (d,  $J = 12.4$  Hz, 1H), 3.25-3.19 (m, 1H), 2.91-2.85 (m, 1H), 2.57-2.49 (m, 1H), 2.34-2.28 (m, 1H), 2.23 (s, 3H), 1.40-1.35 (m, 6H);  $^{13}\text{C}$  NMR (150 MHz,  $\text{CDCl}_3$ )  $\delta$  168.7, 167.3, 142.6, 138.0, 136.7, 131.5, 131.3, 131.1, 131.0, 129.9, 129.8, 128.6, 128.5, 128.3, 128.0, 127.4, 127.2, 127.1, 126.9, 125.8, 125.0, 124.9, 124.8, 124.7, 124.6, 124.2, 84.6, 76.0, 67.9, 62.9, 62.7, 61.6, 52.8, 29.1, 21.5, 14.3, 14.0; FT-IR (neat) 2960, 2925, 1746, 1456, 1343, 1263, 1157, 1090, 670, 583  $\text{cm}^{-1}$ ; HRMS (ESI-TOF)  $m/z$   $[\text{M}+\text{H}]^+$  calcd for  $\text{C}_{41}\text{H}_{40}\text{N}_3\text{O}_6\text{S}$ : 702.2632; Found 702.2633.

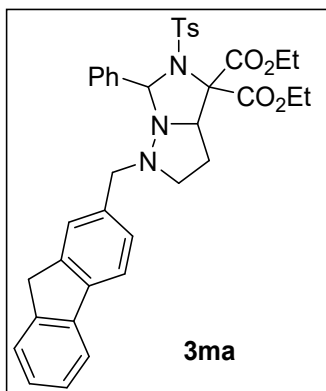

**Diethyl 1-((9H-fluoren-2-yl)methyl)-6-phenyl-5-tosylhexa-**

**hydro-4H-imidazo[1,5-*b*]pyrazole-4,4-dicarboxylate 3ma.** Analytical TLC on silica gel, 1:4 ethyl acetate/hexane  $R_f = 0.47$ ; thick liquid; yield 73% (48 mg);  $^1\text{H NMR}$  (400 MHz,  $\text{CDCl}_3$ )  $\delta$  (400 MHz,  $\text{CDCl}_3$ )  $\delta$  7.72 (d,  $J = 7.6$  Hz, 1H), 7.52-7.50 (m, 2H), 7.35 (t,  $J = 7.2$  Hz, 1H), 7.31-7.27 (m, 2H), 7.24 (s, 1H), 7.16 (s, 1H), 7.08-7.02 (m, 3H), 6.97-6.93 (m, 1H), 6.88-6.84 (m, 4H), 5.41 (s, 1H), 4.50-4.43 (m, 1H), 4.40-4.34 (m, 4H), 3.72-3.67 (m, 3H), 3.46 (d,  $J = 12.4$  Hz, 1H), 3.30-3.24 (m, 1H), 2.72-2.66 (m, 1H), 2.55-2.42 (m, 1H), 2.25 (s, 3H), 2.21-2.14 (m, 1H), 1.43-1.36 (m, 6H);  $^{13}\text{C NMR}$  (100 MHz,  $\text{CDCl}_3$ )  $\delta$  168.6, 167.3, 143.4, 143.1, 142.6, 141.7, 140.7, 138.1, 137.1, 136.6, 129.7, 128.5, 128.4, 128.1, 128.0, 127.5, 126.8, 126.6, 126.0, 125.1, 119.8, 119.3, 84.7, 76.2, 68.7, 63.2, 62.8, 62.7, 52.8, 36.8, 28.5, 21.5, 14.2, 14.1; FT-IR (neat) 2981, 2926, 1742, 1456, 1343, 1264, 1156, 1090, 697, 582  $\text{cm}^{-1}$ ; HRMS (ESI-TOF)  $m/z$   $[\text{M}+\text{H}]^+$  calcd for  $\text{C}_{38}\text{H}_{40}\text{N}_3\text{O}_6\text{S}$ : 666.2632; Found 666.2637.

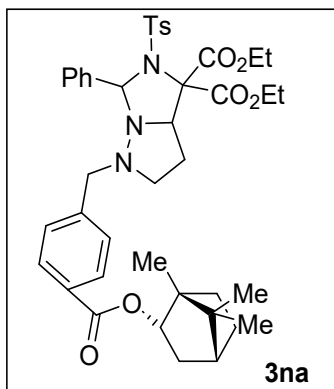

**Diethyl 6-phenyl-5-tosyl-1-(4-(((1S,4S)-1,7,7-trimethylbicyclo**

**[2.2.1]heptan-2-yl)oxy)carbonyl)benzyl) hexahydro-4H-imidazo[1,5-*b*] pyrazole-4,4-dicarboxylate 3na.** Analytical TLC on silica gel, 1:5 ethyl acetate/hexane  $R_f = 0.45$ ; thick liquid; yield 55% (41 mg);  $^1\text{H NMR}$  (500 MHz,  $\text{CDCl}_3$ )  $\delta$  7.72-7.70 (m, 1H), 7.52-7.50 (m, 1H), 7.15-7.13 (m, 2H), 7.11-7.10 (m, 1H), 7.08 (d,  $J = 8.0$  Hz, 2H), 7.01 (t,  $J = 7.5$  Hz, 3H), 6.89-6.85 (m, 2H), 6.35 (d,  $J = 9.0$  Hz, 1H), 5.32 (s, 1H), 5.17-5.14 (m, 1H), 5.09-5.07 (m, 1H), 4.48-4.44 (m, 1H), 4.38-4.33 (m, 4H), 4.14-4.01 (m, 3H), 3.76-3.75 (m, 1H), 3.61 (d,  $J = 13.0$  Hz, 1H), 3.45 (d,  $J = 13.0$  Hz, 1H), 3.34-3.29 (m, 1H), 2.69-2.64 (m, 1H), 2.52-2.43 (m, 1H), 2.32 (s, 3H), 2.26 (s, 2H), 2.22-2.17 (m, 1H), 2.11-2.04 (m, 1H), 1.74-1.73 (m, 1H), 1.42-



1.36 (m, 6H), 1.20-1.18 (m, 2H), 1.15-1.12 (m, 2H), 0.97 (s, 1H), 0.92 (s, 1H), 0.90 (s, 1H);  $^{13}\text{C}$  NMR (125 MHz,  $\text{CDCl}_3$ )  $\delta$  168.6, 167.9, 166.6, 143.0, 142.7, 138.1, 137.7, 129.8, 129.3, 129.1, 128.6, 128.5, 128.4, 127.8, 127.6, 127.1, 126.8, 84.7, 80.4, 76.0, 68.1, 62.8, 62.3, 62.0, 57.9, 57.1, 53.0, 49.2, 48.0, 45.1, 37.1, 28.9, 27.5, 21.5, 19.9, 19.1, 14.3, 14.0; FT-IR (neat) 2957, 2935, 1735, 1455, 1340, 1271, 1157, 1092, 668, 582  $\text{cm}^{-1}$ ; HRMS (ESI-TOF)  $m/z$   $[\text{M}+\text{H}]^+$  calcd for  $\text{C}_{42}\text{H}_{52}\text{N}_3\text{O}_8\text{S}$ : 758.3470; Found 758.3488.

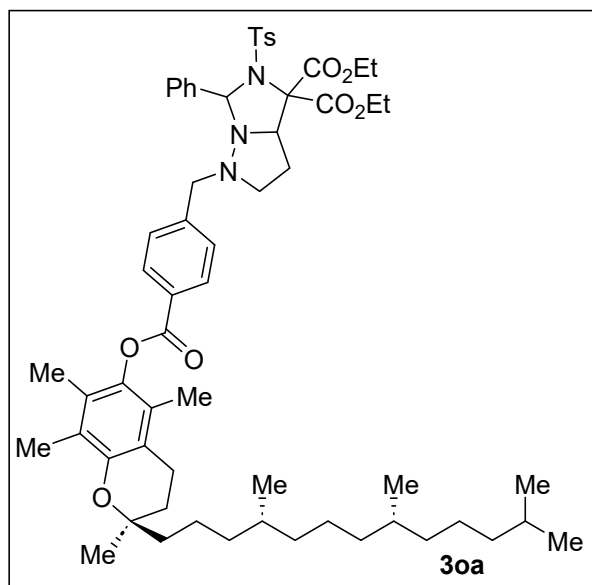

Diethyl (3aR,6R)-6-phenyl-1-(4-(((R)-

**2,5,7,8-tetramethyl-2-((4R,8R)-4,8,12-trimethyltridecyl) chroman-6-yl)oxy)carbonyl)-benzyl)-5-tosylhexahydro-4H-imidazo[1,5-*b*]pyrazole-4,4-dicarboxylate 30a. Analytical TLC on silica gel, 1:5 ethyl acetate/hexane  $R_f = 0.45$ ; thick liquid; yield 60% (61 mg);  $^1\text{H}$  NMR (400 MHz,  $\text{CDCl}_3$ )  $\delta$  7.89 (d,  $J = 8.0$  Hz, 2H), 7.25 (s, 1H), 7.15-7.00 (m, 6H), 6.91-6.86 (m, 4H), 5.33 (s, 1H), 4.50-4.44 (m, 1H), 4.42-4.35 (m, 4H), 4.15-3.99 (m, 1H), 3.66 (d,  $J = 12.8$  Hz, 1H), 3.49 (d,  $J = 12.0$  Hz, 1H), 3.40-3.34 (m, 1H), 2.74-2.68 (m, 1H), 2.62 (t,  $J = 6.0$  Hz, 2H), 2.58-2.49 (m, 1H), 2.32 (s, 1H), 2.27-2.21 (m, 4H), 2.12 (s, 3H), 2.05-2.00 (m, 6H), 1.86-1.77 (m, 3H), 1.57-1.49 (m, 8H), 1.44-1.37 (m, 10H), 1.21-1.06 (m, 9H), 0.88-0.84 (m, 12H);  $^{13}\text{C}$  NMR (100 MHz,  $\text{CDCl}_3$ )  $\delta$  168.6, 167.3, 165.2, 149.6, 143.9, 142.7, 140.8, 138.0, 136.9, 129.9, 129.8, 129.3, 129.2, 128.6, 128.5, 128.4, 128.3, 128.2, 127.6, 127.1, 127.0, 126.9, 125.2, 123.3, 117.6, 84.7, 76.0, 75.2, 68.0, 62.9, 62.8, 62.7, 53.2, 39.5, 37.6, 37.5, 37.4, 33.0, 32.9, 32.8, 29.8, 29.0, 28.1, 25.0, 24.9, 24.6, 22.9, 22.8, 21.5, 21.2, 20.8, 19.9, 19.8, 19.7, 14.3, 14.1, 13.2, 12.3, 12.0; FT-IR (neat) 2925, 2867, 1732, 1457, 1343, 1235, 1159, 1090, 667, 582  $\text{cm}^{-1}$ ; HRMS (ESI-TOF)  $m/z$   $[\text{M}+\text{H}]^+$  calcd for  $\text{C}_{61}\text{H}_{84}\text{N}_3\text{O}_9\text{S}$ : 1034.5923; Found 1034.5924.**

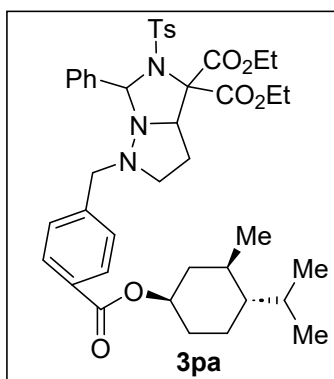

**Diethyl 1-(4-((((1R,2S,5R)-2-isopropyl-5-methylcyclohexyl)-**

**oxy)carbonyl)benzyl)-6-phenyl-5-tosylhexahydro-4H-imidazo[1,5-*b*]** **pyrazole-4,4-**

**dicarboxylate 3pa.** Analytical TLC on silica gel, 1:5 ethyl acetate/hexane  $R_f = 0.45$ ; thick

liquid; yield 68% (51 mg);  $^1\text{H NMR}$  (400 MHz,  $\text{CDCl}_3$ )  $\delta$  7.71 (d,  $J = 8.4$  Hz, 2H), 7.24 (s,

2H), 7.02-6.99 (m, 5H), 6.89-6.85 (m, 4H), 5.32 (d,  $J = 2.8$  Hz, 1H), 4.93-4.86 (m, 1H), 4.47-

4.42 (m, 1H), 4.40-4.33 (m, 4H), 3.62-3.58 (m, 1H), 3.44 (d,  $J = 12.8$  Hz, 1H), 3.34-3.28 (m,

1H), 2.68-2.62 (m, 1H), 2.55-2.46 (m, 1H), 2.26 (s, 3H), 2.22-2.15 (m, 1H), 2.13-2.07 (m, 1H),

1.97-1.91 (m, 1H), 1.74 (d,  $J = 11.2$  Hz, 2H), 1.43-1.36 (m, 6H), 1.19-1.03 (m, 4H), 0.94-0.91

(m, 7H), 0.81-0.78 (m, 3H);  $^{13}\text{C NMR}$  (100 MHz,  $\text{CDCl}_3$ )  $\delta$  168.4, 167.1, 166.0, 142.9, 142.6,

137.9, 136.7, 129.7, 129.1, 129.0, 128.9, 128.4, 128.3, 128.1, 127.4, 84.6, 75.9 74.6, 68.0, 62.8,

62.6, 52.9, 47.3, 41.0, 34.3, 31.5, 29.7, 28.8, 26.5, 23.6, 22.1, 21.4, 20.8, 16.5, 14.1, 13.9; FT-

IR (neat) 2925, 2854, 1711, 1456, 1345, 1269, 1159, 1096, 696, 583  $\text{cm}^{-1}$ ; HRMS (ESI-TOF)

$m/z$   $[\text{M}+\text{H}]^+$  calcd for  $\text{C}_{42}\text{H}_{54}\text{N}_3\text{O}_8\text{S}$ : 760.3626; Found 760.3626.

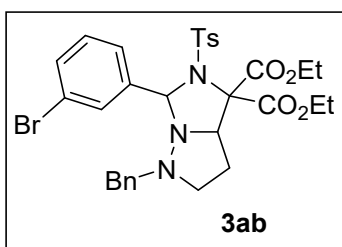

**Diethyl 1-benzyl-6-(3-bromophenyl)-5-tosylhexahydro-4H-**

**imidazo[1,5-*b*]pyrazole-4,4-dicarboxylate 3ab.** Analytical TLC on silica gel, 1:4 ethyl

acetate/hexane  $R_f = 0.47$ ; thick liquid; yield 72% (49 mg);  $^1\text{H NMR}$  (400 MHz,  $\text{CDCl}_3$ )  $\delta$  7.33

(d,  $J = 8.4$  Hz, 2H), 7.18 (d,  $J = 7.6$  Hz, 1H), 7.12 (d,  $J = 8.4$  Hz, 1H), 7.06 (s, 1H), 7.02 (d,  $J$

= 7.6 Hz, 1H), 6.92-6.83 (m, 7H), 5.19 (s, 1H), 4.52-4.46 (m, 1H), 4.42-4.35 (m, 4H), 3.47 (d,

$J = 12.4$  Hz, 1H), 3.38-3.31 (m, 2H), 2.73-2.67 (m, 1H), 2.56-2.47 (m, 1H), 2.30 (s, 3H), 2.27-

2.19 (m, 1H), 1.42 (t,  $J = 7.2$  Hz, 6H);  $^{13}\text{C NMR}$  (150 MHz,  $\text{CDCl}_3$ )  $\delta$  168.4, 167.1, 143.4,

140.2, 138.8, 137.5, 132.4, 132.2, 131.5, 130.3, 129.3, 128.9, 128.6, 128.5, 128.4, 127.8,

122.03, 122.00, 83.8, 75.9, 68.0, 63.0, 62.9, 62.5, 53.3, 29.0, 21.6, 14.3, 14.1; FT-IR (KBr)

2980, 2935, 1750, 1473, 1344, 1263, 1158, 1090, 670, 581  $\text{cm}^{-1}$ ; HRMS (ESI-TOF)  $m/z$

$[\text{M}+\text{H}]^+$  calcd for  $\text{C}_{31}\text{H}_{35}\text{BrN}_3\text{O}_6\text{S}$ : 656.1424; Found 656.1424.

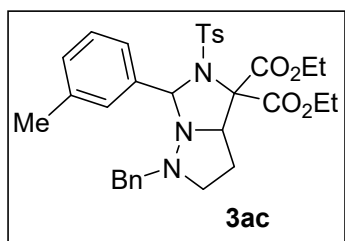

Diethyl

1-benzyl-6-(*m*-tolyl)-5-tosyl-hexahydro-4H-

imidazo[1,5-*b*]pyrazole-4,4-dicarboxylate **3ac**. Analytical TLC on silica gel, 1:4 ethyl acetate/hexane  $R_f = 0.47$ ; thick liquid; yield 65% (42 mg);  $^1\text{H}$  NMR (600 MHz,  $\text{CDCl}_3$ )  $\delta$  7.31 (d,  $J = 7.8$  Hz, 2H), 7.14-7.13 (m, 3H), 7.06-7.05 (m, 2H), 7.00 (d,  $J = 7.8$  Hz, 1H), 6.92 (t,  $J = 7.8$  Hz, 1H), 6.89-6.86 (m, 3H), 6.77 (s, 1H), 5.40 (s, 1H), 4.49-4.43 (m, 1H), 4.40-4.33 (m, 4H), 3.70 (d,  $J = 12.6$  Hz, 1H), 3.37 (d,  $J = 12.6$  Hz, 1H), 3.21-3.17 (m, 1H), 2.61-2.57 (m, 1H), 2.55-2.49 (m, 1H), 2.28 (s, 3H), 2.16-2.10 (m, 1H), 2.01 (s, 3H), 1.42-1.38 (m, 6H);  $^{13}\text{C}$  NMR (150 MHz,  $\text{CDCl}_3$ )  $\delta$  168.6, 167.3, 142.5, 138.2, 137.9, 137.3, 136.8, 130.1, 129.2, 129.1, 128.5, 128.3, 128.0, 127.6, 127.1, 127.0, 84.7, 76.1, 69.1, 63.0, 62.8, 52.7, 28.0, 21.5, 21.2, 14.3, 14.0; FT-IR (KBr) 2960, 2924, 1747, 1454, 1344, 1263, 1157, 1092, 670, 580  $\text{cm}^{-1}$ ; HRMS (ESI-TOF)  $m/z$   $[\text{M}+\text{H}]^+$  calcd for  $\text{C}_{32}\text{H}_{38}\text{N}_3\text{O}_6\text{S}$ : 592.2476; Found 592.2504.

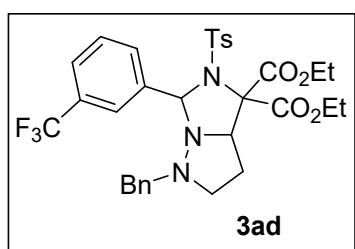

Diethyl

1-benzyl-5-tosyl-6-(3-(trifluoromethyl)phenyl)-

hexahydro-4H-imidazo[1,5-*b*]pyrazole-4,4-dicarboxylate **3ad**. Analytical TLC on silica gel, 1:4 ethyl acetate/hexane  $R_f = 0.45$ ; thick liquid; yield 70% (45 mg);  $^1\text{H}$  NMR (400 MHz,  $\text{CDCl}_3$ )  $\delta$  7.32-7.29 (m, 4H), 7.18 (s, 1H), 7.09 (t,  $J = 7.6$  Hz, 1H), 7.05-7.00 (m, 3H), 6.93-6.91 (m, 2H), 6.88 (d,  $J = 8.4$  Hz, 2H), 5.35 (s, 1H), 4.49-4.44 (m, 1H), 4.42-4.36 (m, 4H), 3.52 (d,  $J = 12.4$  Hz, 1H), 3.39 (d,  $J = 12.4$  Hz, 1H), 3.34-3.28 (m, 1H), 2.74-2.68 (m, 1H), 2.54-2.46 (m, 1H), 2.25 (s, 3H), 2.22-2.17 (m, 1H), 1.43-1.39 (m, 6H);  $^{13}\text{C}$  NMR (150 MHz,  $\text{CDCl}_3$ )  $\delta$  168.4, 167.1, 143.3, 138.3, 137.7, 137.6, 133.3, 130.3 ( $J_{\text{C-F}} = 32.1$ ), 130.1, 129.9, 129.7, 129.1, 128.6, 128.4, 128.0, 127.9, 127.1, 126.6 ( $J_{\text{C-F}} = 270.7$ ), 126.54 ( $J_{\text{C-F}} = 3.6$ ), 126.52, 126.5, 126.4, 125.2 ( $J_{\text{C-F}} = 3.1$ ), 125.17, 125.15, 125.1, 124.8, 123.0, 121.2, 84.1, 76.1, 68.2, 63.2, 63.0, 62.9, 53.0, 29.0, 21.4, 14.2, 14.0;  $^{19}\text{F}$  NMR (377 MHz,  $\text{CDCl}_3$ )  $\delta$  -62.59; FT-IR (neat) 2985, 2929, 1749, 1454, 1329, 1268, 1161, 1093, 701, 580  $\text{cm}^{-1}$ ; HRMS (ESI-TOF)  $m/z$   $[\text{M}+\text{H}]^+$  calcd for  $\text{C}_{32}\text{H}_{35}\text{F}_3\text{N}_3\text{O}_6\text{S}$ : 646.2193; Found 646.2200.

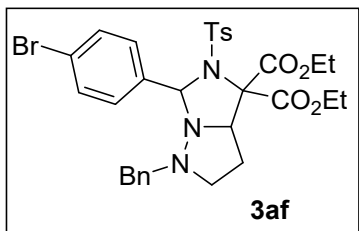

**Diethyl 1-(4-bromobenzyl)-6-phenyl-5-tosylhexa-hydro-4H-imidazo[1,5-*b*]pyrazole-4,4-dicarboxylate 3af.** Analytical TLC on silica gel, 1:4 ethyl acetate/hexane  $R_f = 0.47$ ; thick liquid; yield 60% (39 mg);  $^1\text{H NMR}$  (500 MHz,  $\text{CDCl}_3$ )  $\delta$  7.24 (s, 2H), 7.13 (d,  $J = 8.0$  Hz, 2H), 7.09-7.08 (m, 1H), 6.99 (d,  $J = 7.5$  Hz, 2H), 6.91 (t,  $J = 7.5$  Hz, 2H), 6.87 (d,  $J = 8.5$  Hz, 2H), 6.82 (d,  $J = 8.5$  Hz, 2H), 5.30 (s, 1H), 4.48- 4.41 (m, 1H), 4.39-4.32 (m, 4H), 3.51 (d,  $J = 12.5$  Hz, 1H), 3.34-3.27 (m, 2H), 2.67-2.62 (m, 1H), 2.54-2.47 (m, 1H), 2.27 (s, 3H), 2.22-2.16 (m, 1H), 1.42-1.37 (m, 6H);  $^{13}\text{C NMR}$  (100 MHz,  $\text{CDCl}_3$ )  $\delta$  168.6, 167.3, 142.7, 138.0, 137.0, 136.8, 131.0, 130.9, 129.8, 128.6, 128.4, 128.2, 127.6, 120.9, 84.7, 76.0, 68.2, 62.9, 62.8, 62.4, 53.0, 28.9, 21.5, 14.3, 14.0; FT-IR (neat) 2960, 2924, 1746, 1457, 1344, 1264, 1158, 1091, 670, 582  $\text{cm}^{-1}$ ; HRMS (ESI-TOF)  $m/z$   $[\text{M}+\text{H}]^+$  calcd for  $\text{C}_{31}\text{H}_{35}\text{BrN}_3\text{O}_6\text{S}$ : 656.1424; Found 656.1423.

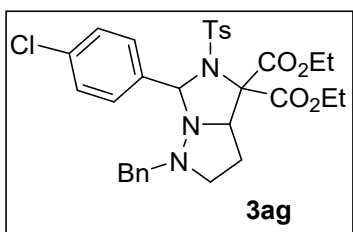

**Diethyl 1-benzyl-6-(4-chlorophenyl)-5-tosylhexahydro-4H-imidazo[1,5-*b*]pyrazole-4,4-dicarboxylate 3ag.** Analytical TLC on silica gel, 1:4 ethyl acetate/hexane  $R_f = 0.47$ ; thick liquid; yield 66% (40 mg);  $^1\text{H NMR}$  (500 MHz,  $\text{CDCl}_3$ )  $\delta$  7.34 (d,  $J = 8.0$  Hz, 2H), 7.13-7.05 (m, 3H), 6.96-6.92 (m, 6H), 6.85 (d,  $J = 8.5$  Hz, 2H), 5.27 (s, 1H), 4.49-4.42 (m, 1H), 4.41-4.31 (m, 4H), 3.55 (d,  $J = 12.5$  Hz, 1H), 3.39 (d,  $J = 13.0$  Hz, 1H), 3.30-3.25 (m, 1H), 2.69-2.64 (m, 1H), 2.53-2.46 (m, 1H), 2.32 (s, 3H), 2.19-2.12 (m, 1H), 1.42-1.38 (m, 6H);  $^{13}\text{C NMR}$  (150 MHz,  $\text{CDCl}_3$ )  $\delta$  168.6, 167.1, 143.1, 137.9, 137.8, 135.6, 134.3, 131.1, 129.2, 128.6, 128.5, 128.0, 127.7, 127.0, 83.8, 75.9, 68.2, 63.1, 62.9, 62.8, 52.9, 28.8, 21.5, 14.3, 14.0; FT-IR (neat) 2981, 2926, 1745, 1454, 1344, 1265 1157, 1088, 670, 579  $\text{cm}^{-1}$ ; HRMS (ESI-TOF)  $m/z$   $[\text{M}+\text{H}]^+$  calcd for  $\text{C}_{31}\text{H}_{35}\text{ClN}_3\text{O}_6\text{S}$ : 612.1930; Found 612.1939.

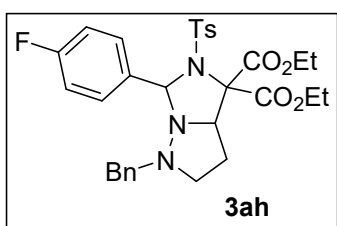

**Diethyl 1-benzyl-6-(4-fluorophenyl)-5-tosylhexahydro-4H-imidazo[1,5-*b*]pyrazole-4,4-dicarboxylate 3ah.** Analytical TLC on silica gel, 1:4 ethyl

acetate/hexane  $R_f = 0.47$ ; thick liquid; yield 75% (44 mg);  $^1\text{H}$  NMR (400 MHz,  $\text{CDCl}_3$ )  $\delta$  7.34 (d,  $J = 8.4$  Hz, 2H), 7.11-7.08 (m, 3H), 7.05-7.01 (m, 2H), 6.99-6.96 (m, 2H), 6.94 (d,  $J = 8.4$  Hz, 2H), 6.59 (t,  $J = 8.8$  Hz, 2H), 5.31 (s, 1H), 4.48-4.43 (m, 1H), 4.39-4.31 (m, 4H), 3.57 (d,  $J = 12.4$  Hz, 1H), 3.39 (d,  $J = 12.4$  Hz, 1H), 3.29-3.23 (m, 1H), 2.69-2.63 (m, 1H), 2.54-2.47 (m, 1H), 2.30 (s, 3H), 2.20-2.12 (m, 1H), 1.42-1.37 (m, 6H);  $^{13}\text{C}$  NMR (100 MHz,  $\text{CDCl}_3$ )  $\delta$  168.6, 167.2, 144.2, 143.0, 138.1, 137.8, 132.9 ( $J_{\text{C-F}} = 2.9$ ), 132.8, 131.6 ( $J_{\text{C-F}} = 8.5$ ), 131.5, 129.8 ( $J_{\text{C-F}} = 236.7$ ), 129.2, 128.6, 128.4, 128.0, 127.5, 127.1, 114.5 ( $J_{\text{C-F}} = 21.4$ ), 114.3, 83.8, 75.9, 68.2, 63.1, 62.9, 62.8, 52.8, 28.8, 21.5, 14.3, 14.0;  $^{19}\text{F}$  NMR (377 MHz,  $\text{CDCl}_3$ )  $\delta$  -114.21; FT-IR (KBr) 2982, 2926, 1743, 1454, 1343, 1225, 1158, 1093, 671, 579  $\text{cm}^{-1}$ ; HRMS (ESI-TOF)  $m/z$   $[\text{M}+\text{H}]^+$  calcd  $\text{C}_{31}\text{H}_{35}\text{FN}_3\text{O}_6\text{S}$ : 596.2225; Found 596.2227.

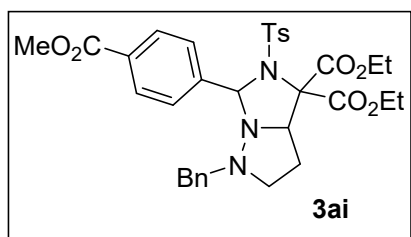

**Diethyl 1-benzyl-6-(4-(methoxycarbonyl)phenyl)-5-tosyl-**

**hexahydro-4H-imidazo[1,5-*b*]pyrazole-4,4-dicarboxylate 3ai.** Analytical TLC on silica gel, 3:7 ethyl acetate/hexane  $R_f = 0.47$ ; colorless solid; mp 123-124  $^\circ\text{C}$ ; yield 76% (48 mg);  $^1\text{H}$  NMR (500 MHz,  $\text{CDCl}_3$ )  $\delta$  7.58 (d,  $J = 8.0$  Hz, 2H), 7.33 (d,  $J = 8.0$  Hz, 2H), 7.12 (d,  $J = 8.5$  Hz, 2H), 7.09-7.04 (m, 3H), 6.97-6.96 (m, 2H), 6.87 (d,  $J = 8.0$  Hz, 2H), 5.36 (s, 1H), 4.48-4.43 (m, 1H), 4.39-4.34 (m, 4H), 3.91 (s, 3H), 3.56 (d,  $J = 12.5$  Hz, 1H), 3.37 (d,  $J = 12.5$  Hz, 1H), 3.28-3.23 (m, 1H), 2.68-2.63 (m, 1H), 2.53-2.41 (m, 1H), 2.26 (s, 3H), 2.20-2.13 (m, 1H), 1.42-1.38 (m, 6H);  $^{13}\text{C}$  NMR (150 MHz,  $\text{CDCl}_3$ )  $\delta$  168.5, 167.0, 143.2, 142.3, 137.74, 137.71, 129.9, 129.7, 129.2, 128.8, 128.6, 128.5, 128.0, 127.1, 84.1, 76.1, 68.5, 63.2, 62.9, 62.8, 52.8, 52.2, 28.7, 21.4, 14.2, 14.0; FT-IR (KBr) 2982, 2954, 1745, 1721, 1436, 1344, 1273, 1158, 1020, 668, 580  $\text{cm}^{-1}$ ; HRMS (ESI-TOF)  $m/z$   $[\text{M}+\text{H}]^+$  calcd for  $\text{C}_{33}\text{H}_{38}\text{N}_3\text{O}_6\text{S}$ : 636.2374; Found 636.2379.

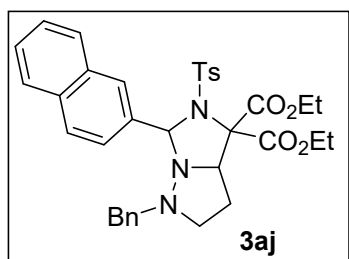

**Diethyl 1-benzyl-6-(naphthalen-2-yl)-5-tosylhexahydro-4H-**

**imidazo[1,5-*b*]pyrazole-4,4-dicarboxylate 3aj.** Analytical TLC on silica gel, 1:4 ethyl acetate/hexane  $R_f = 0.48$ ; thick liquid; yield 58% (36 mg);  $^1\text{H}$  NMR (400 MHz,  $\text{CDCl}_3$ )  $\delta$  7.58-7.54 (m, 3H), 7.53-7.50 (m, 2H), 7.40-7.36 (m, 2H), 7.34-7.31 (m, 2H), 7.19 (d,  $J = 8.4$  Hz,

2H), 7.06 (d,  $J = 10.0$  Hz, 1H), 6.94 (d,  $J = 8.8$  Hz, 1H), 6.89 (d,  $J = 10.0$  Hz, 1H), 6.50 (d,  $J = 8.4$  Hz, 2H), 5.48 (s, 1H), 4.54-4.48 (m, 1H), 4.45-4.37 (m, 4H), 3.74 (d,  $J = 12.8$  Hz, 1H), 3.56 (d,  $J = 12.4$  Hz, 1H), 3.39-3.33 (m, 1H), 2.79-2.73 (m, 1H), 2.64-2.56 (m, 1H), 2.32-2.17 (m, 1H), 2.02 (s, 3H), 1.45-1.40 (m, 6H);  $^{13}\text{C}$  NMR (100 MHz,  $\text{CDCl}_3$ )  $\delta$  168.6, 167.3, 142.6, 137.7, 135.4, 134.1, 133.5, 133.0, 132.6, 132.5, 129.6, 128.5, 128.0, 127.9, 127.6, 127.5, 127.4, 127.3, 127.2, 126.3, 126.1, 125.7, 125.6, 125.5, 84.7, 76.0, 68.5, 63.3, 62.9, 62.8, 53.1, 28.7, 21.2, 14.3, 14.1; FT-IR (KBr) 2963, 2926, 1745, 1456, 1342, 1263, 1158, 1090, 667, 583  $\text{cm}^{-1}$ ; HRMS (ESI-TOF)  $m/z$   $[\text{M}+\text{H}]^+$  calcd for  $\text{C}_{35}\text{H}_{38}\text{N}_3\text{O}_6\text{S}$ : 628.2476; Found 628.2477.

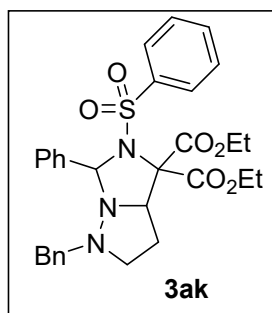

**Diethyl 1-benzyl-6-phenyl-5-(phenylsulfonyl)hexa-hydro-4H-**

**imidazo[1,5-*b*]pyrazole-4,4-dicarboxylate 3ak.** Analytical TLC on silica gel, 1:4 ethyl acetate/hexane  $R_f = 0.47$ ; orange solid; mp 99-100  $^\circ\text{C}$ ; yield 68% (38 mg);  $^1\text{H}$  NMR (400 MHz,  $\text{CDCl}_3$ )  $\delta$  7.44 (d,  $J = 7.6$  Hz, 2H), 7.30-7.28 (m, 1H), 7.14-7.05 (m, 10H), 6.98-6.94 (m, 2H), 5.44 (s, 1H), 4.49-4.43 (m, 1H), 4.39-4.34 (m, 4H), 3.67 (d,  $J = 12.4$  Hz, 1H), 3.38 (d,  $J = 12.4$  Hz, 1H), 3.23-3.17 (m, 1H), 2.64-2.58 (m, 1H), 2.55-2.47 (m, 1H), 2.18-2.09 (m, 1H), 1.43-1.37 (m, 6H);  $^{13}\text{C}$  NMR (150 MHz,  $\text{CDCl}_3$ )  $\delta$  168.5, 167.2, 141.1, 137.9, 137.0, 131.9, 129.7, 129.2, 128.5, 128.4, 128.1, 127.8, 127.7, 127.1, 84.8, 76.2, 68.9, 63.1, 62.8, 62.7, 52.6, 28.4, 14.2, 14.0; FT-IR (neat) 2981, 2950, 1743, 1448, 1346, 1265, 1159, 1089, 687, 588  $\text{cm}^{-1}$ ; HRMS (ESI-TOF)  $m/z$   $[\text{M}+\text{H}]^+$  calcd for  $\text{C}_{30}\text{H}_{34}\text{N}_3\text{O}_6\text{S}$ : 564.2163; Found 564.2153.

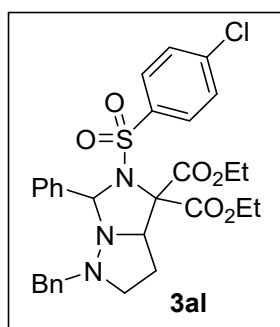

**Diethyl 1-benzyl-5-((4-chlorophenyl)sulfonyl)-6-phenylhexa-**

**hydro-4H-imidazo[1,5-*b*]pyrazole-4,4-dicarboxylate 3al.** Analytical TLC on silica gel, 1:4 ethyl acetate/hexane  $R_f = 0.47$ ; thick liquid; yield 73% (43 mg);  $^1\text{H}$  NMR (600 MHz,  $\text{CDCl}_3$ )  $\delta$  7.36 (d,  $J = 8.4$  Hz, 2H), 7.13-7.11 (m, 6H), 7.05-7.02 (m, 4H), 6.99 (t,  $J = 7.2$  Hz, 2H), 5.42 (s, 1H), 4.48-4.42 (m, 1H), 4.39-4.33 (m, 4H), 3.64 (d,  $J = 13.2$  Hz, 1H), 3.38 (d,  $J = 12.6$  Hz,

1H), 3.24-3.20 (m, 1H), 2.65-2.61 (m, 1H), 2.54-2.48 (m, 1H), 2.17-2.11(m, 1H), 1.42-1.38 (m, 6H); <sup>13</sup>C NMR (150 MHz, CDCl<sub>3</sub>) δ 168.5, 167.1, 139.6, 138.5, 137.8, 136.8, 130.1, 129.8, 129.2, 128.6, 128.1, 128.0, 127.9, 127.2, 84.8, 76.2, 68.8, 63.1, 62.9, 62.8, 52.7, 28.5, 14.3, 14.0; FT-IR (KBr) 2981, 2955, 1746, 1477, 1348, 1266, 1162, 1089, 699, 566 cm<sup>-1</sup>; HRMS (ESI-TOF) *m/z* [M+H]<sup>+</sup> calcd for C<sub>30</sub>H<sub>33</sub>ClN<sub>3</sub>O<sub>6</sub>S: 598.1773; Found 598.1802.

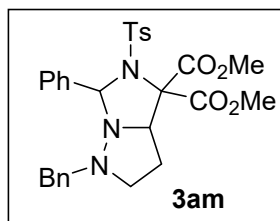

**Dimethyl 1-benzyl-6-phenyl-5-tosylhexahydro-4H-imidazo[1,5-b]pyrazole-4,4-dicarboxylate 3am.** Analytical TLC on silica gel, 1:4 ethyl acetate/hexane *R<sub>f</sub>* = 0.45; colorless solid; mp 123-124 °C; yield 85% (46 mg); <sup>1</sup>H NMR (400 MHz, CDCl<sub>3</sub>) δ 7.24 (s, 2H), 7.15-7.13 (m, 5H), 7.11-7.09 (m, 1H), 7.06-7.05 (m, 2H), 7.01-6.97 (m, 2H), 6.90 (d, *J* = 8.0 Hz, 2H), 5.45 (s, 1H), 4.36 (t, *J* = 6.4 Hz, 1H), 3.93 (d, *J* = 12.4 Hz, 6H), 3.70 (d, *J* = 12.8 Hz, 1H), 3.36 (d, *J* = 1.4 Hz, 1H), 3.19-3.13 (m, 1H), 2.61-2.55 (m, 1H), 2.53-2.45 (m, 1H), 2.28 (s, 3H), 2.16-2.08 (m, 1H); <sup>13</sup>C NMR (150 MHz, CDCl<sub>3</sub>) δ 169.1, 167.7, 142.8, 138.0, 137.8, 137.1, 129.6, 129.2, 128.5, 128.4, 128.3, 128.1, 127.8, 127.2, 84.8, 76.1, 69.2, 63.0, 53.6, 53.4, 52.6, 28.1, 21.5; FT-IR (KBr) 3030, 2952, 1748, 1454, 1344, 1272, 1157, 1089, 700, 580 cm<sup>-1</sup>; HRMS (ESI-TOF) *m/z* [M+H]<sup>+</sup> calcd for C<sub>29</sub>H<sub>32</sub>N<sub>3</sub>O<sub>6</sub>S: 550.2006; Found 550.2004.

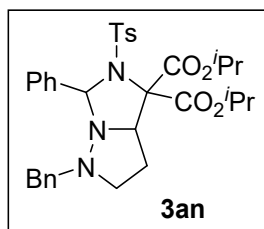

**Di-iso-propyl 1-benzyl-6-phenyl-5-tosylhexahydro-4H-imidazo[1,5-b]pyrazole-4,4-dicarboxylate 3an.** Analytical TLC on silica gel, 1:4 ethyl acetate/hexane *R<sub>f</sub>* = 0.45; thick liquid; yield 70% (42 mg); <sup>1</sup>H NMR (500 MHz, CDCl<sub>3</sub>) δ 7.37 (d, *J* = 8.0 Hz, 2H), 7.13-7.10 (m, 5H), 7.08 (d, *J* = 7.5 Hz, 1H), 7.03-7.02 (m, 2H), 6.97 (t, *J* = 7.5 Hz, 2H), 6.91 (d, *J* = 8.0 Hz, 2H), 5.35 (s, 1H), 5.28-5.19 (m, 2H), 4.34 (t, *J* = 7.0 Hz, 1H), 3.63 (d, *J* = 12.5 Hz, 1H), 3.37 (d, *J* = 12.5 Hz, 1H), 3.26-3.21 (m, 1H), 2.63-2.58 (m, 1H), 2.50-2.43 (m, 1H), 2.28 (s, 3H), 2.14-2.08 (m, 1H), 1.40-1.36 (m, 12H); <sup>13</sup>C NMR (125 MHz, CDCl<sub>3</sub>) δ 168.0, 166.6, 142.5, 138.1, 137.9, 137.2, 129.7, 129.1, 128.5, 128.3, 128.1, 127.9, 127.4, 126.9, 84.7, 76.2, 70.9, 70.4, 68.3, 63.1, 52.6, 28.6, 21.8, 21.7, 21.63, 21.60, 21.4; FT-IR (KBr) 2983, 2925, 1741, 1454, 1345, 1277, 1159, 1089, 699, 577 cm<sup>-1</sup>; HRMS (ESI-TOF) *m/z* [M+H]<sup>+</sup> calcd for C<sub>33</sub>H<sub>40</sub>N<sub>3</sub>O<sub>6</sub>S: 606.2632; Found 606.2632.

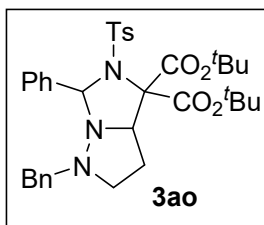

**Di-tert-butyl 1-benzyl-6-phenyl-5-tosylhexahydro-4H-imidazo[1,5-**

**b]pyrazole-4,4-dicarboxylate 3ao.** Analytical TLC on silica gel, 1:4 ethyl acetate/hexane  $R_f = 0.45$ ; thick liquid; yield 65% (41 mg);  $^1\text{H}$  NMR (400 MHz,  $\text{CDCl}_3$ )  $\delta$  7.43 (d,  $J = 8.4$  Hz, 2H), 7.14-7.13 (d,  $J = 7.2$  Hz, 5H), 7.09 (d,  $J = 7.6$  Hz, 1H), 7.04-7.03 (m, 2H), 6.98 (t,  $J = 7.6$  Hz, 2H), 6.94 (d,  $J = 8.0$  Hz, 2H), 5.28 (s, 1H), 4.33 (t,  $J = 6.8$  Hz, 1H), 3.64 (d,  $J = 12.8$  Hz, 1H), 3.40 (d,  $J = 12.4$  Hz, 1H), 3.26-3.20 (m, 1H), 2.64-2.58 (m, 1H), 2.47-2.39 (m, 1H), 2.29 (s, 3H), 2.13-2.05 (m, 1H), 1.59-1.58 (m, 18H);  $^{13}\text{C}$  NMR (100 MHz,  $\text{CDCl}_3$ )  $\delta$  167.3, 165.9, 142.3, 138.2, 137.9, 137.5, 129.6, 129.3, 128.5, 128.4, 128.0, 127.9, 127.4, 126.9, 84.8, 83.8, 83.0, 68.6, 63.2, 52.5, 28.4, 28.0, 27.9, 21.4; FT-IR (KBr) 2975, 2926, 1742, 1455, 1345, 1250, 1154, 1089, 699, 584  $\text{cm}^{-1}$ ; HRMS (ESI-TOF)  $m/z$   $[\text{M}+\text{H}]^+$  calcd for  $\text{C}_{35}\text{H}_{44}\text{N}_3\text{O}_6\text{S}$ : 634.2945; Found 634.2948.

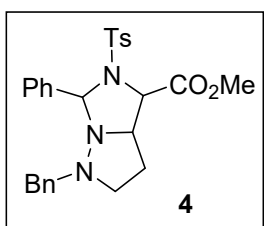

**Methyl 1-benzyl-6-phenyl-5-tosylhexahydro-1H-imidazo[1,5-**

**b]pyrazole-4-carboxylate 4.** Analytical TLC on silica gel, 3:7 ethyl acetate/hexane  $R_f = 0.49$ ; colorless solid; yield 72% (35 mg);  $^1\text{H}$  NMR (400 MHz,  $\text{CDCl}_3$ )  $\delta$  7.79 (d,  $J = 8.4$  Hz, 2H), 7.54 (d,  $J = 7.2$  Hz, 2H), 7.29-7.27 (m, 4H), 7.25-7.23 (m, 4H), 7.16-7.14 (m, 2H), 5.94 (s, 1H), 4.26 (d,  $J = 7.2$  Hz, 1H), 4.12 (d,  $J = 12.4$  Hz, 1H), 3.85 (t,  $J = 8.0$  Hz, 1H), 3.72 (s, 3H), 3.54 (d,  $J = 12.8$  Hz, 1H), 2.82-2.76 (m, 1H), 2.52-2.46 (m, 1H), 2.43 (s, 3H), 2.24-2.17 (m, 1H), 2.05-1.97 (m, 1H);  $^{13}\text{C}$  NMR (100 MHz,  $\text{CDCl}_3$ )  $\delta$  171.5, 143.9, 139.1, 138.1, 135.6, 129.6, 129.2, 128.4, 128.3, 128.2, 128.1, 127.6, 127.4, 86.5, 67.4, 66.1, 63.3, 52.7, 51.1, 28.8, 21.8; FT-IR (neat) 2953, 2925, 1748, 1454, 1344, 1265, 1157, 1089, 701, 580  $\text{cm}^{-1}$ ; HRMS (ESI-TOF)  $m/z$   $[\text{M}+\text{H}]^+$  calcd for  $\text{C}_{27}\text{H}_{30}\text{N}_3\text{O}_4\text{S}$ : 492.1952; Found 492.1966.

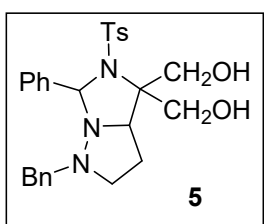

**(1-benzyl-6-phenyl-5-tosylhexahydro-1H-imidazo[1,5-b]pyrazole-**

**4,4-diyl)dimethanol 5.** Analytical TLC on silica gel, 2:3 ethyl acetate/hexane  $R_f = 0.49$ ; thick



liquid; yield 82% (40 mg);  $^1\text{H}$  NMR (400 MHz,  $\text{CDCl}_3$ )  $\delta$  7.45 (d,  $J = 8.0$  Hz, 2H), 7.35 (m, 2H), 7.20-7.19 (m, 6H), 7.11 (d,  $J = 8.0$  Hz, 2H), 6.99-6.98 (m, 2H), 5.58 (s, 1H), 4.09-3.99 (m, 3H), 3.91-3.85 (m, 3H), 3.43 (d,  $J = 12.4$  Hz, 1H), 3.13-3.08 (m, 1H), 2.85 (s, 1H), 2.51-2.44 (m, 1H), 2.37 (s, 3H), 2.11-2.05 (m, 2H);  $^{13}\text{C}$  NMR (100 MHz,  $\text{CDCl}_3$ )  $\delta$  143.4, 138.9, 137.7, 136.6, 129.3, 129.1, 128.6, 128.4, 128.2, 127.8, 127.7, 83.2, 74.5, 66.9, 66.5, 62.4, 61.2, 53.7, 24.7, 21.6; FT-IR (neat) 3368, 3031, 2924, 1453, 1373, 1289, 1121, 1090, 738, 571  $\text{cm}^{-1}$ ; HRMS (ESI-TOF)  $m/z$   $[\text{M}+\text{H}]^+$  calcd for  $\text{C}_{27}\text{H}_{32}\text{N}_3\text{O}_4\text{S}$ : 494.2108; Found 494.2107.

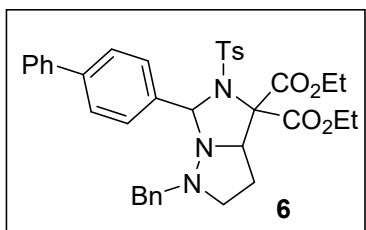

**Diethyl 6-([1,1'-biphenyl]-4-yl)-1-benzyl-5-tosylhexahydro-4H-imidazo[1,5-b]pyrazole-4,4-dicarboxylate 6.** Analytical TLC on silica gel, 1:4 ethyl acetate/hexane  $R_f = 0.47$ ; thick liquid; yield 78% (51 mg);  $^1\text{H}$  NMR (400 MHz,  $\text{CDCl}_3$ )  $\delta$  7.46 (d,  $J = 7.6$  Hz, 2H), 7.34 (t,  $J = 7.6$  Hz, 2H), 7.24-7.22 (m, 3H), 7.21-7.18 (m, 2H), 7.02-6.96 (m, 5H), 6.85 (t,  $J = 7.6$  Hz, 2H), 6.80 (d,  $J = 8.0$  Hz, 2H), 5.32 (s, 1H), 4.40-4.35 (m, 1H), 4.33-4.25 (m, 4H), 3.58 (d,  $J = 12.8$  Hz, 1H), 3.35 (d,  $J = 12.4$  Hz, 1H), 3.24-3.18 (m, 1H), 2.63-2.56 (m, 1H), 2.48-2.39 (m, 1H), 2.18 (s, 3H), 2.15-2.07 (m, 1H), 1.35-1.28 (m, 6H);  $^{13}\text{C}$  NMR (150 MHz,  $\text{CDCl}_3$ )  $\delta$  168.6, 167.3, 142.7, 141.1, 139.9, 138.1, 137.1, 137.0, 129.8, 129.6, 128.8, 128.6, 128.4, 128.2, 127.6, 127.2, 127.1, 126.7, 84.8, 76.1, 68.6, 62.8, 62.77, 62.75, 52.9, 28.6, 21.5, 14.3, 14.1; FT-IR (neat) 2963, 2924, 1745, 1454, 1343, 1264, 1157, 1093, 699, 579  $\text{cm}^{-1}$ ; HRMS (ESI-TOF)  $m/z$   $[\text{M}+\text{H}]^+$  calcd for  $\text{C}_{37}\text{H}_{40}\text{N}_3\text{O}_6\text{S}$ : 654.2632; Found 654.2629.

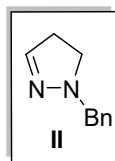

**1-benzyl-4,5-dihydro-1H-pyrazole II.** Analytical TLC on silica gel, 3:7 ethyl acetate/hexane  $R_f = 0.49$ ; thick liquid; yield 87% (28 mg);  $^1\text{H}$  NMR (400 MHz,  $\text{CDCl}_3$ )  $\delta$  7.39-7.37 (m, 2H), 7.35-7.32 (m, 2H), 7.29-7.27 (m, 1H), 6.82 (s, 1H), 4.21 (s, 2H), 2.92 (t,  $J = 9.6$  Hz, 2H), 2.66-2.61 (m, 2H);  $^{13}\text{C}$  NMR (125 MHz,  $\text{CDCl}_3$ )  $\delta$  143.5, 137.7, 129.1, 128.5, 127.4, 60.8, 52.3, 34.3; FT-IR (neat) 2923, 2823, 1454, 840, 734, 698  $\text{cm}^{-1}$ ; HRMS (ESI-TOF)  $m/z$   $[\text{M}+\text{H}]^+$  calcd for  $\text{C}_{10}\text{H}_{13}\text{N}_2$ : 161.1073; Found 161.1073.

## ADMET and Molecular Docking Studies

The ADMET (adsorption, distribution, metabolism, excretion, and toxicity) properties were examined to study the drug likeness and physicochemical property of all the synthesized compounds using pkCSM tool,<sup>7e</sup> among which compound **4** satisfies the Lipinski's rule and Veber rule (Table S2).<sup>7a,b</sup> The analysis revealed that the gastrointestinal tract (GIT) absorption value for **4** is 98.021, which infers that the corresponding compound may show good absorbance in human intestine. Accounting metabolism, compound **4** was examined for inhibition of the Cytochrome P450 isomers, such as CYP3A4, CYP2D6, CYP2C9, CYP1A2 and CYP2C19 where it emerged as inhibitor of CYP3A4, the key enzyme responsible for drug metabolism. Moreover, compound **4** is not a OCT2 substrate and has good clearance rate compared to Fluconazole, hence it might have shorter dose interval period. Eventually, the final examined factor *i.e.* toxicity was documented in Table S2 where compound **4** has maximum tolerable dose. Also, the Chronic toxic activity (LOAEL) was less, however, the acute toxic activity (LD50) is nearly same with Fluconazole. The aforementioned data suggests that the synthesized **4** has good medicinal implication.

**Table S2. ADMET Properties of Compound 4.**

| Parameter                                              | Compound 4 | Fluconazole |
|--------------------------------------------------------|------------|-------------|
| <b>Absorption</b>                                      |            |             |
| Water solubility (log mol/L)                           | -5.763     | -2.411      |
| Caco2 permeability (log Papp in 10 <sup>-6</sup> cm/s) | 1.272      | 0.754       |
| GIT absorption <sup>a</sup> (%)                        | 98.021     | 72.188      |
| Inhibitor of <i>p</i> -glycoprotein II                 | Yes        | No          |
| Inhibitor of <i>p</i> -glycoprotein I                  | Yes        | No          |
| Substrate for <i>p</i> -glycoprotein                   | No         | No          |
| Skin Permeability (log Kp)                             | -2.711     | -2.736      |
| <b>Distribution</b>                                    |            |             |
| BBB permeability <sup>b</sup> (log BB)                 | -0.820     | -0.706      |
| CNS permeability <sup>c</sup> (log PS)                 | -2.175     | -3.785      |
| VDss (human) <sup>d</sup> (log L/kg)                   | -0.071     | 0.438       |
|                                                        |            |             |

| <b>Metabolism</b>                                       |       |       |
|---------------------------------------------------------|-------|-------|
| CYP3A4 substrate                                        | Yes   | No    |
| CYP2D6 substrate                                        | No    | No    |
| CYP2C9 inhibitor                                        | Yes   | No    |
| CYP1A2 inhibitor                                        | No    | No    |
| CYP2C19 inhibitor                                       | Yes   | No    |
| <b>Excretion</b>                                        |       |       |
| Renal OCT2 substrate <sup>e</sup>                       | No    | No    |
| Total clearance (log ml/min/kg)                         | 0.960 | 0.851 |
| <b>Toxicity</b>                                         |       |       |
| Skin sensitization                                      | No    | No    |
| Hepatotoxic effect                                      | Yes   | Yes   |
| Oral rat chronic toxicity (LOAEL)<br>(log mg/kg_bw/day) | 1.334 | 1.281 |
| Oral rat acute toxicity (LD50) (mol/kg)                 | 2.332 | 2.321 |
| hERG II inhibitor                                       | No    | No    |
| hERG I inhibitor                                        | No    | No    |
| Max. Tolerated dose (log mg/kg/day)                     | 0.458 | 0.608 |
| AMES toxicity                                           | No    | No    |

<sup>a</sup>Gastro intestinal tract; <sup>b</sup>blood brain barrier permeant; <sup>c</sup>central nervous system permeant; <sup>d</sup>VDss: volume of distribution; <sup>e</sup>Renal organic cation transporter 2.

Here we exhibit the best docking pose of **4** and compare it with standard ligand Fluconazole to study antifungal activity of synthesized moiety. Here the interactions between **4** and amino acid residues of target protein lanosterol 14 $\alpha$ -demethylase (**CYP51**) (PDB ID: 4WMZ)<sup>7d</sup> was unveiled using AutoDock Suite.<sup>7c</sup> The results revealed that the binding energy/docking score of docked **4** with target protein is -7.46 kcal/mol while for Fluconazole the corresponding energy/ score is -4.27 kcal/mol. Again, H-bonding interactions was found between **4** and nearby residues, such as TYR140, GLY314, GLY315 while Fluconazole forms H-bonding with LYS151, HIS468, ILE471, GLY472 amino acid residues of target protein **CYP51** (Figure S2).

**(a)**

| 2D Interaction diagram of Fluconazole                                             |                             | 3D Interaction diagram of Fluconazole                                              |                             |
|-----------------------------------------------------------------------------------|-----------------------------|------------------------------------------------------------------------------------|-----------------------------|
| 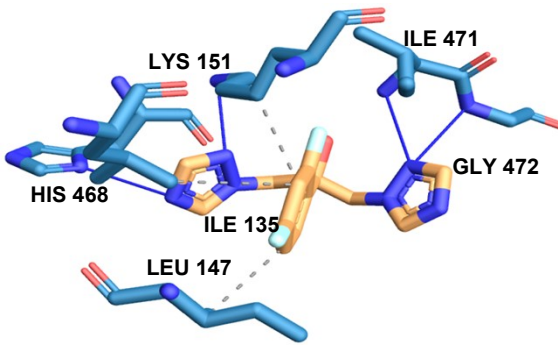 |                             |  |                             |
| Inhibitors                                                                        | Docking Score<br>(kcal/mol) | Hydrogen Bond<br>interactions                                                      | Hydrophobic<br>Interactions |
| Fluconazole                                                                       | -4.27 kcal/mol              | LYS151, HIS468,<br>ILE471, GLY472                                                  | ILE135, LEU147,<br>LYS151   |

**(b)**

| 2D Interaction diagram of compound 4                                                |                             | 3D Interaction diagram of compound 4                                                 |                                                                 |
|-------------------------------------------------------------------------------------|-----------------------------|--------------------------------------------------------------------------------------|-----------------------------------------------------------------|
| 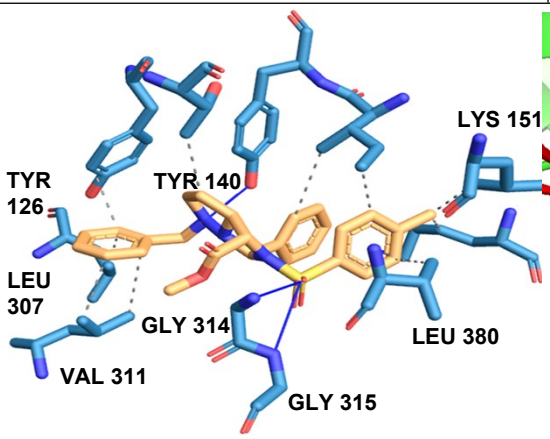 |                             |  |                                                                 |
| Inhibitors                                                                          | Docking Score<br>(kcal/mol) | Hydrogen Bonding<br>Interaction                                                      | Hydrophobic<br>Interaction                                      |
| Compound 4                                                                          | -7.46 kcal/mol              | TYR140, GLY314,<br>GLY315                                                            | TYR126, THR130,<br>ILE139, LYS151,<br>LEU307, VAL311,<br>LEU380 |

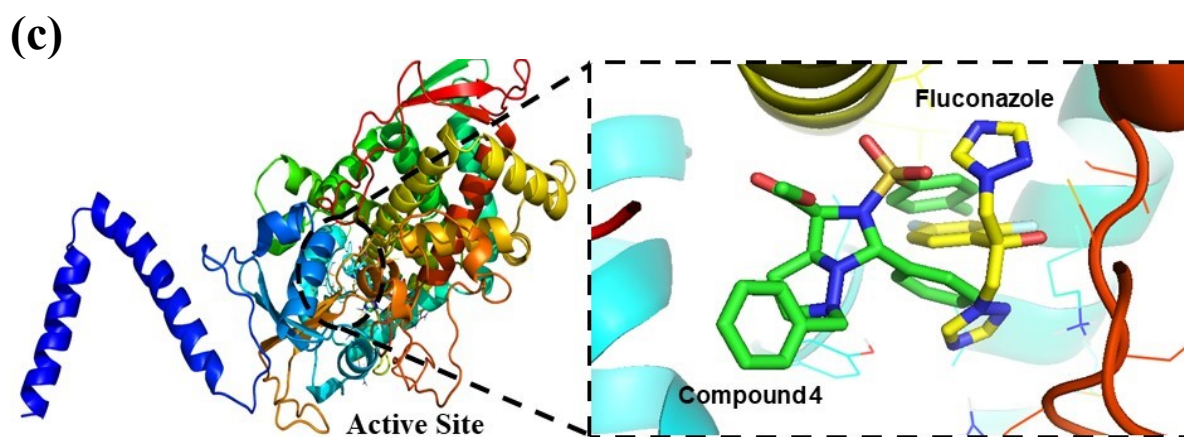

**Figure S2. The Result of Docking Experiment.** Schematic representations of binding mode of Fluconazole (a) and compound 4 (b) with target enzyme **CYP51** (blue bonds showing H-bond interactions and dotted white bonds showing hydrophobic interactions with the binding site residues) (C) Best docking pose of compound 4 (green) and comparison with the initial ligand Fluconazole (yellow) with **CYP51** pocket.

## References

- 1) For preparation of diaziridines, see: (a) V. V. Kuznetsov, S. A. Kutepov, N. N. Makhova, K. A. Lyssenko and D. E. Dmitriev, *Russ. Chem. Bull.*, 2003, **52**, 665; (b) Y. B. Koptelov, *Russ. J. Org. Chem.*, 2006, **42**, 1510; (c) Y. B. Koptelov, S. P. Saik, A. P. Molchanov and S. I. Selivanov, *Russ. J. Org. Chem.*, 2011, **47**, 421; (d) A. W. Beebe, E. F. Dohmeier and G. Moura-Letts, *Chem. Commun.*, 2015, **51**, 13511; (e) S. Arora, V. Palani and T. R. Hoye, *Org. Lett.*, 2018, **20**, 8082; (f) A. O. Chagarovskiy, V. S. Vasin, V. V. Kuznetsov, O. A. Ivanova, V. B. Rybakov, A. N. Shumsky, N. N. Makhova and I. V. Trushkov, *Angew. Chem. Int. Ed.*, 2018, **57**, 10338; (g) J. Cao, G. Wang, L. Gao, X. Cheng and S. Li, *Chem. Sci.*, 2018, **9**, 3664; (h) Y. Wang, J. Zhu, A. C. Durham, H. Lindberg and Y.-M. Wang, *J. Am. Chem. Soc.*, 2019, **141**, 19594; (i) L. Gao, X. Liu, G. Li, S. Chen, J. Cao, G. Wang and S. Li, *Org. Lett.*, 2022, **24**, 5698; (j) M. Mishra, P. K. Maharana, P. Karjee and T. Punniyamurthy, *Chem. Commun.*, 2022, **58**, 7090.
- 2) For preparation of DA aziridines, see: (a) R. Fan and Y. Ye, *Adv. Synth. Catal.*, 2008, **350**, 1526; (b) X. Wu, L. Li and J. Zhang, *Adv. Synth. Catal.*, 2012, **354**, 3485; (c) Y. Liao, X. Liu, Y. Zhang, Y. Xu, Y. Xia, L. Lin and X. Feng, *Chem. Sci.*, 2016, **7**, 3775.
- 3) T. A. Kornilova, R. R. Kostikov, A. F. Khlebnikov and I. G. Zenkevich, *J. Phys. Org. Chem.*, DOI:10.1002/poc.3843.
- 4) A. Jacob, P. G. Jones and D. B. Werz, *Org. Chem. Front.*, 2022, **9**, 6933.
- 5) M. Prieto, E. Zurita, E. Rosa, L. Muñoz, P. Lloyd-Williams and E. Giralt, *J. Org. Chem.*, 2004, **69**, 6812.

- 6) (a) M. Marigo, A. Kjærsgaard, K. Juhl, N. Gathergood and K. A. Jørgensen, *Chem. Eur. J.*, 2003, **9**, 2359; (b) S. Zhang, P. Deng, J. Zhou, M. Liu, G. Liang, Y. Xiong and H. Zhou, *Chem. Commun.*, 2017, **53**, 12914; (c) M. Buchsteiner, L. Martinez-Rodriguez, P. Jerabek, I. Pozo, M. Patzer, N. Nöthling, C. W. Lehmann and A. Fürstner, *Chem. Eur. J.*, 2020, **26**, 2509.
- 7) C. A. Lipinski, F. Lombardo, B. W. Dominy and P. J. Feeney, *Adv. Drug Deliv. Rev.*, 2001, **46**, 3; (b) D. F. Veber, S. R. Johnson, H.-Y. Cheng, B. R. Smith, K. W. Ward and K. D. Kopple, *J. Med. Chem.*, 2002, **45**, 2615; (c) G. M. Morris, R. Huey, W. Lindstrom, M. F. Sanner, R. K. Belew, D. S. Goodsell and A. J. Olson, *J. Comput. Chem.*, 2009, **30**, 2785; (d) A. A. Sagatova, M. V. Keniya, R. K. Wilson, B. C. Monk and J. D. A. Tyndall, *Antimicrob. Agents Chemother.*, 2015, **59**, 4982; (e) D. E. V. Pires, T. L. Blundell and D. B. Ascher, *J. Med. Chem.*, 2015, **58**, 4066.

### NMR ( $^1\text{H}$ , $^{13}\text{C}$ and $^{19}\text{F}$ ) Spectra

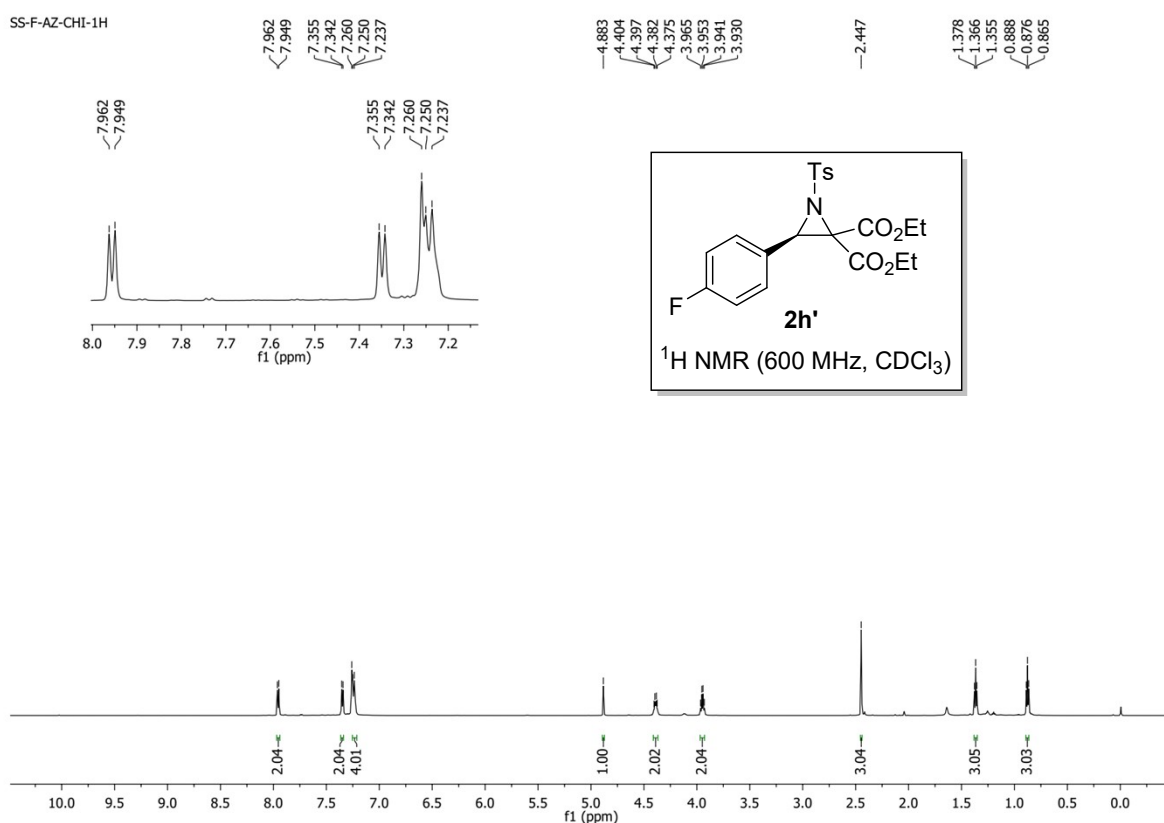

SS-46-L-1H

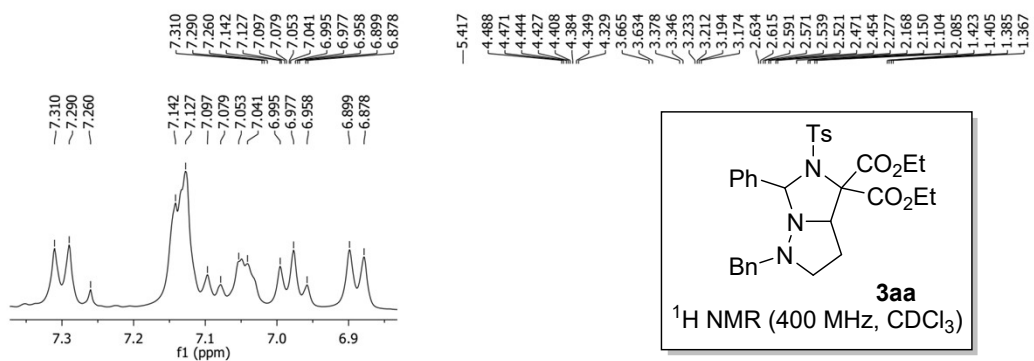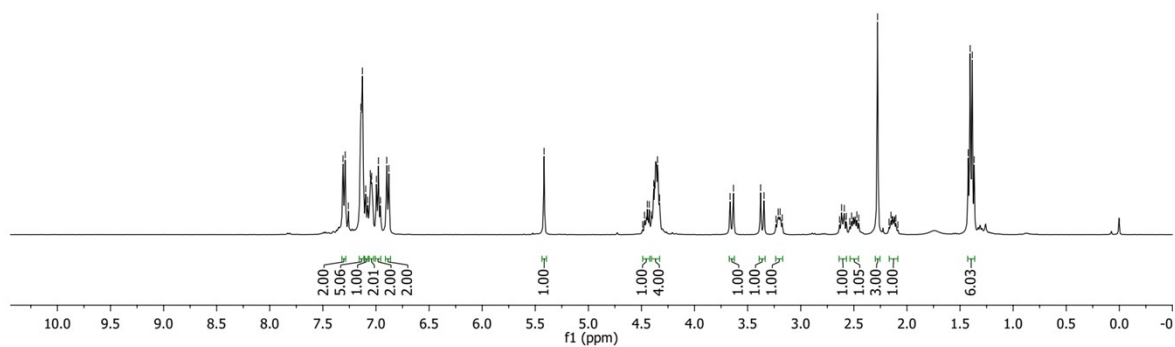

SS-46 13C

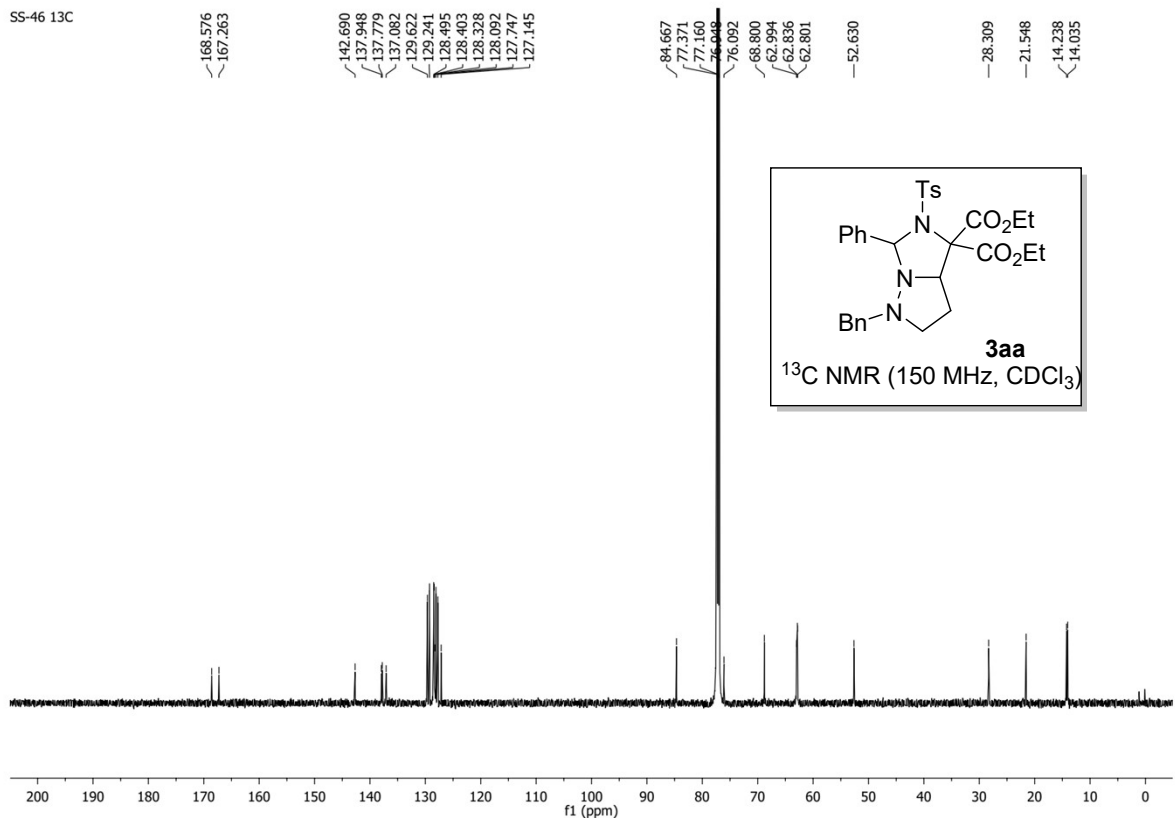

SS-133-1H

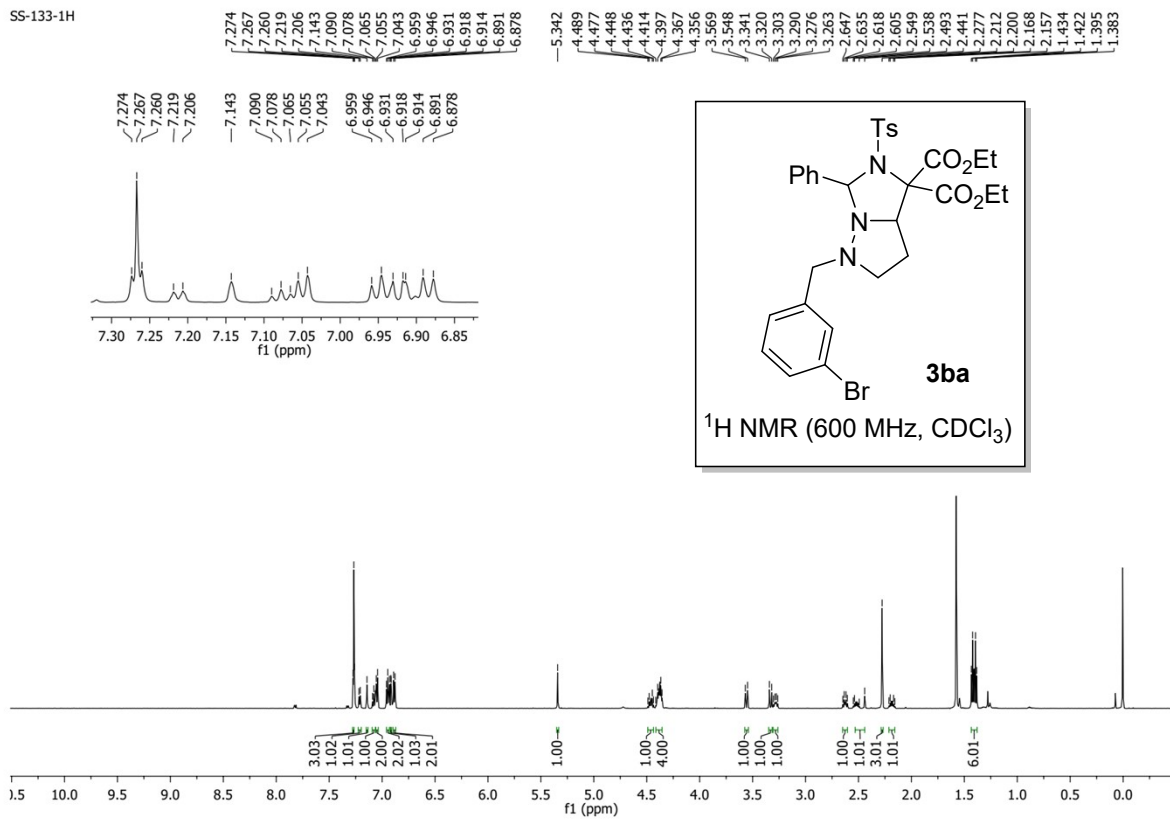

SS-133-13C

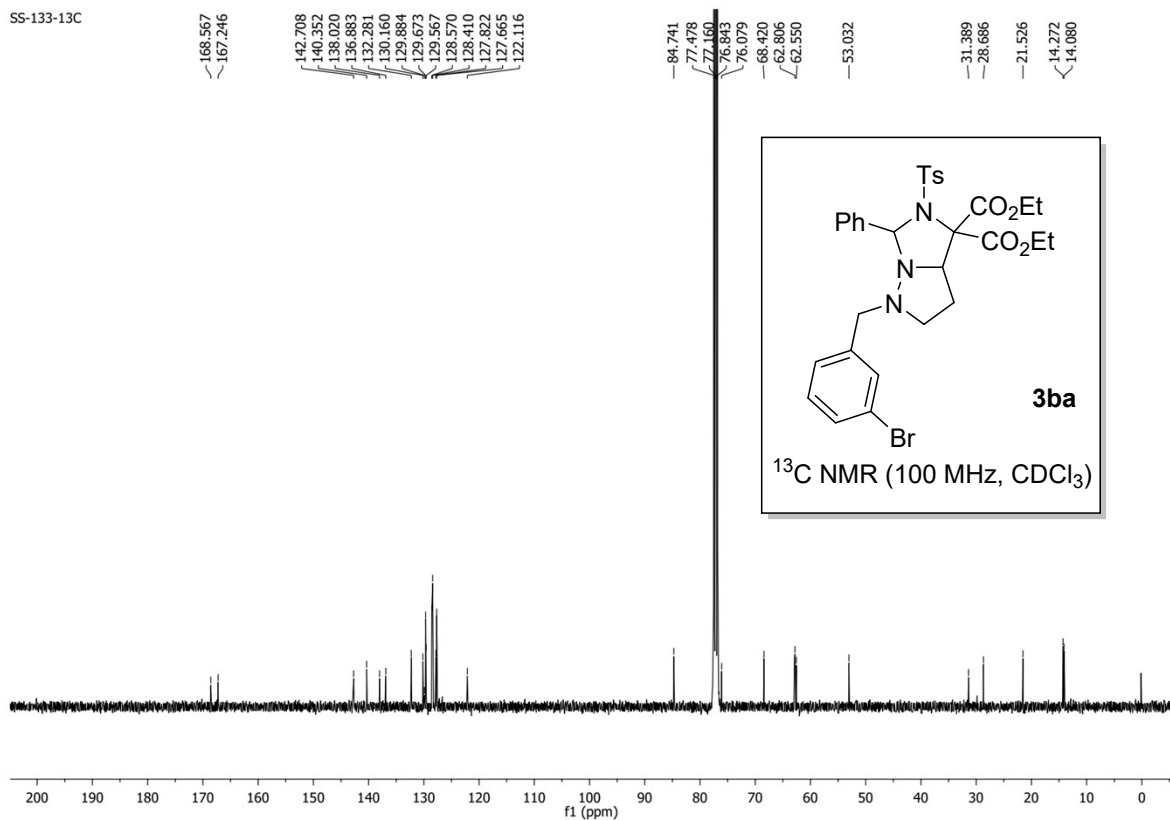



SS-82 1H

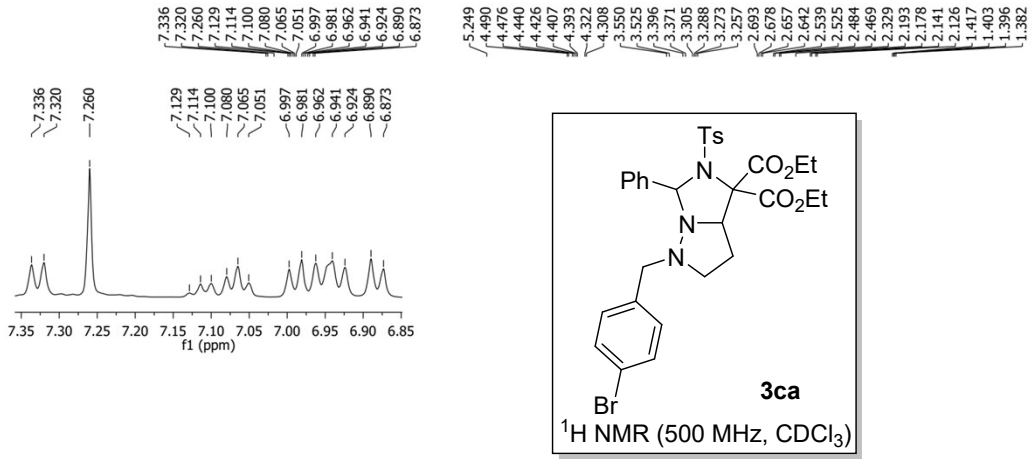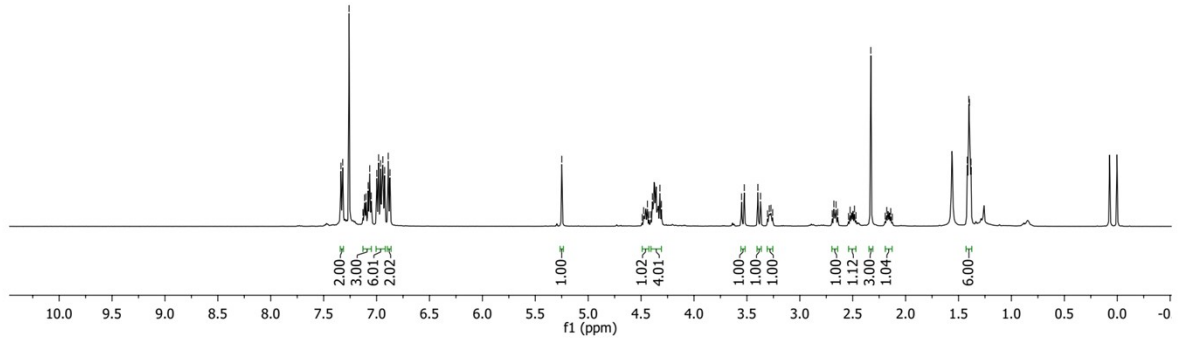

SS-82 13C

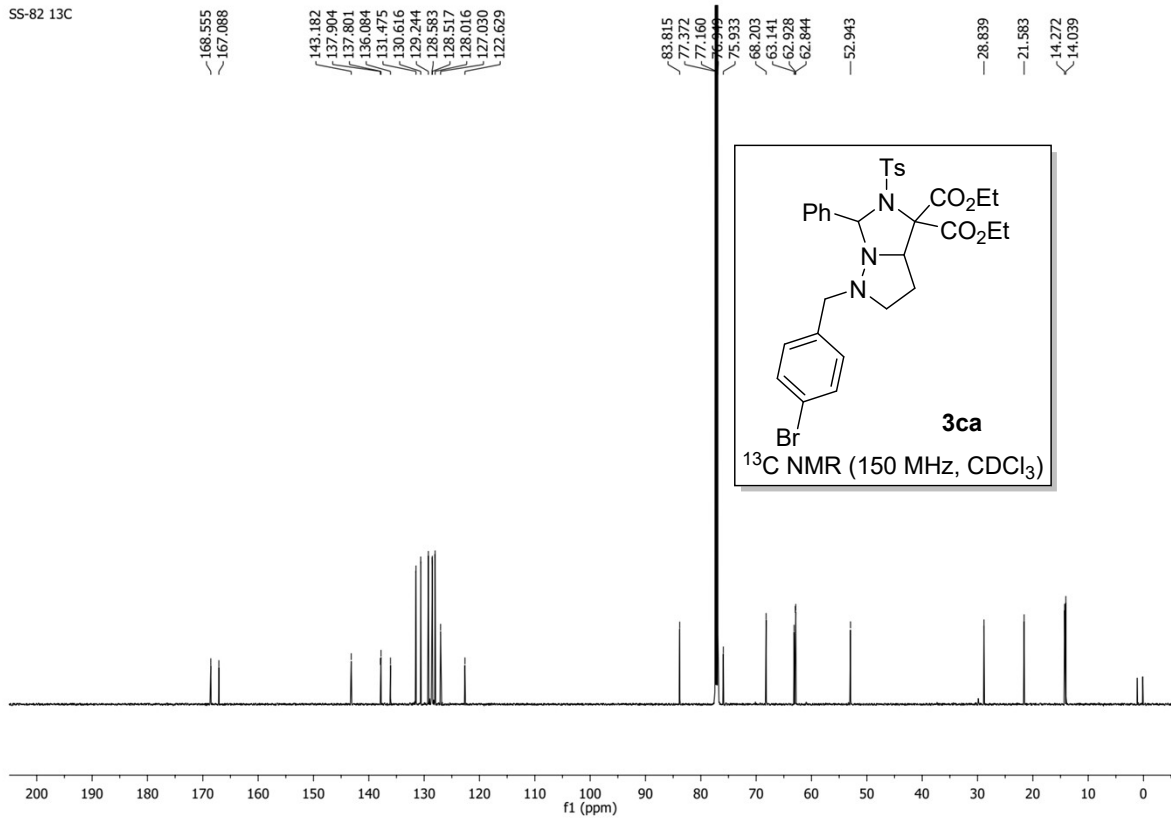

SS-132 1H

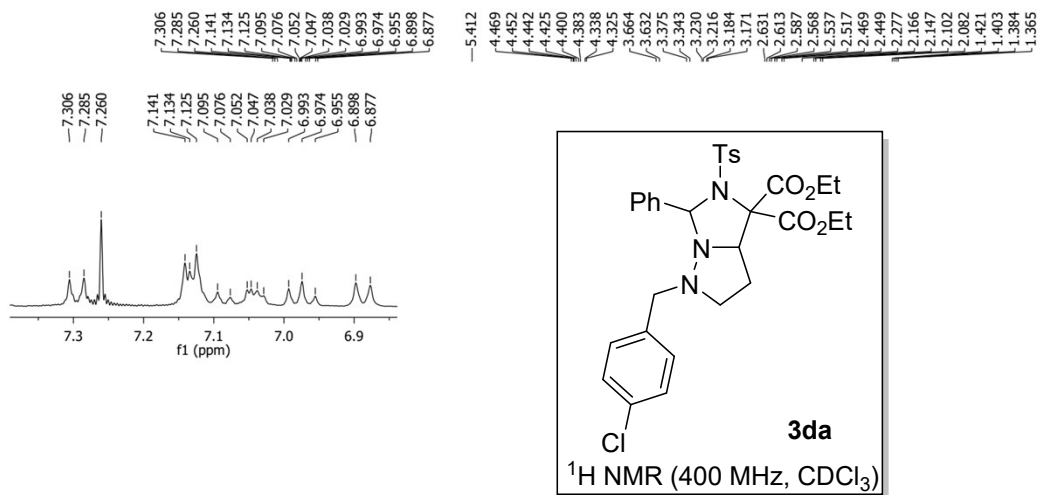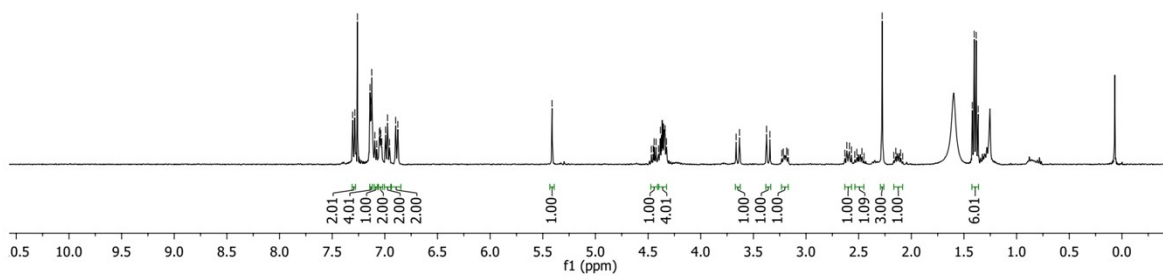

SS-132 13C

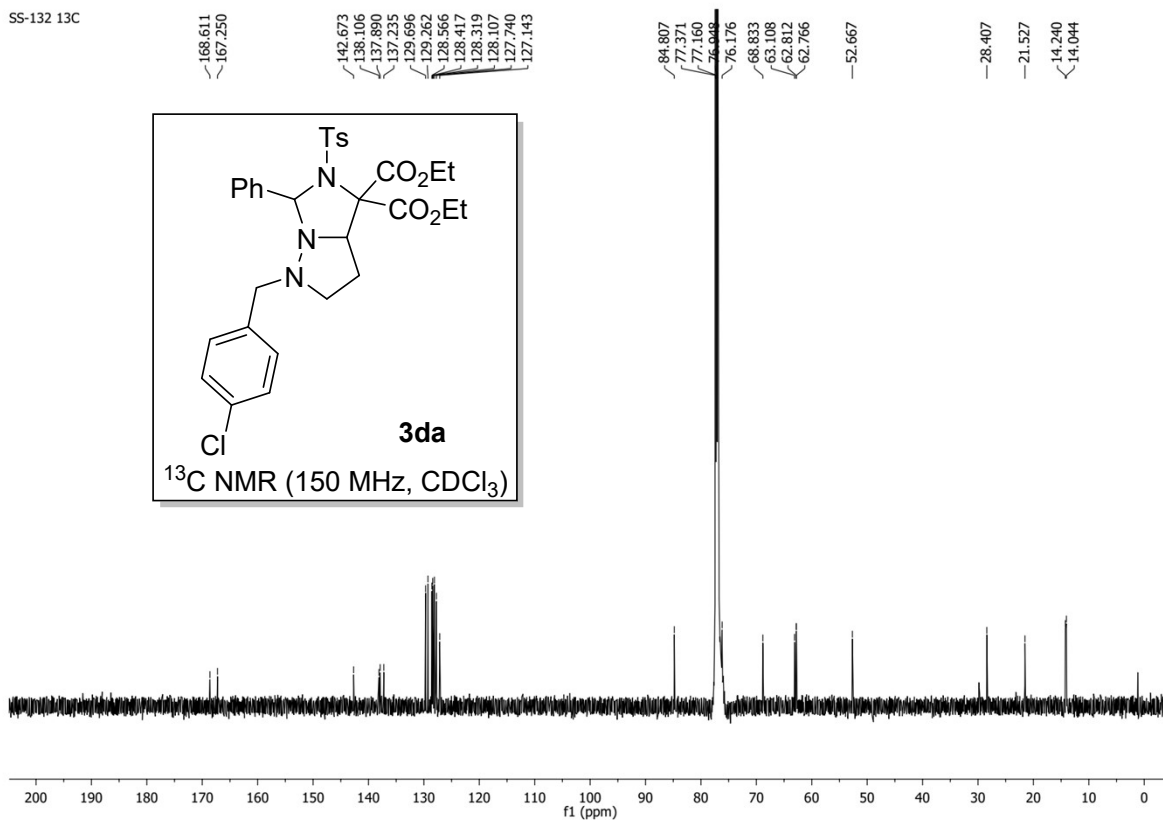

SS-72 1H

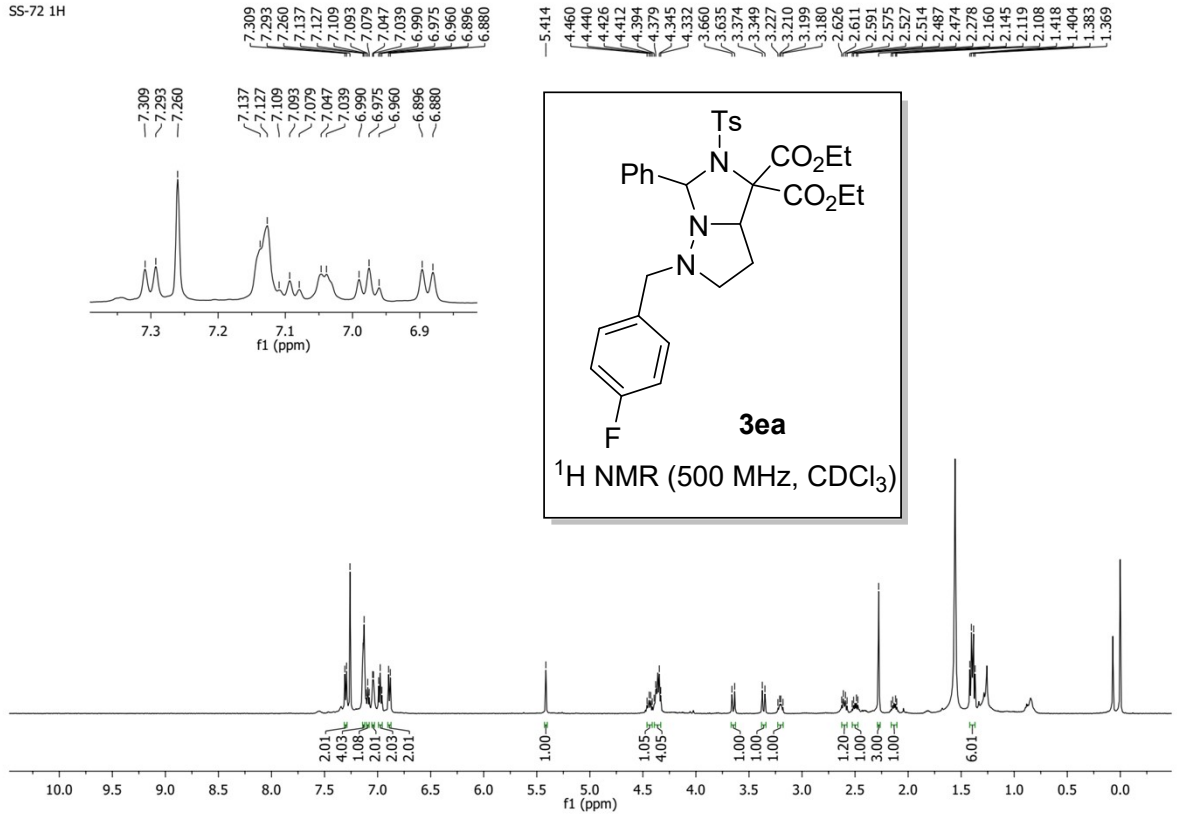

SS-72 13C

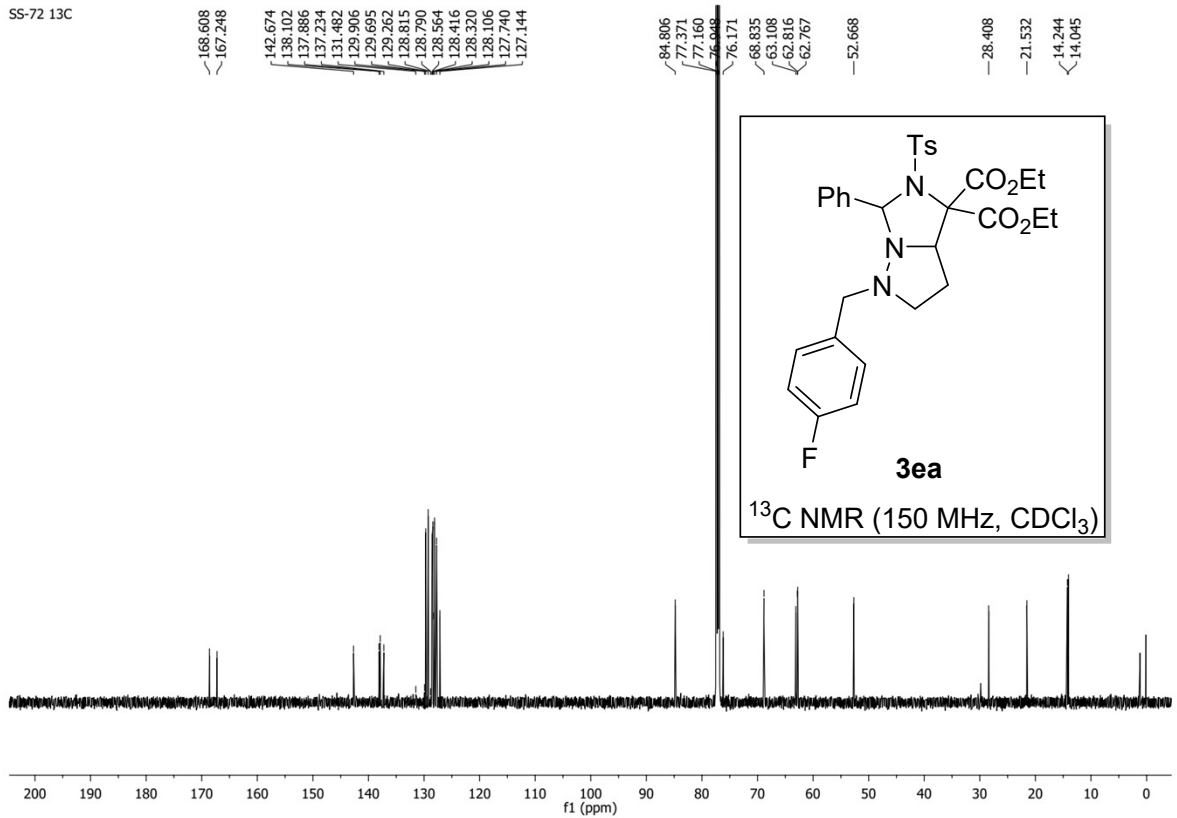

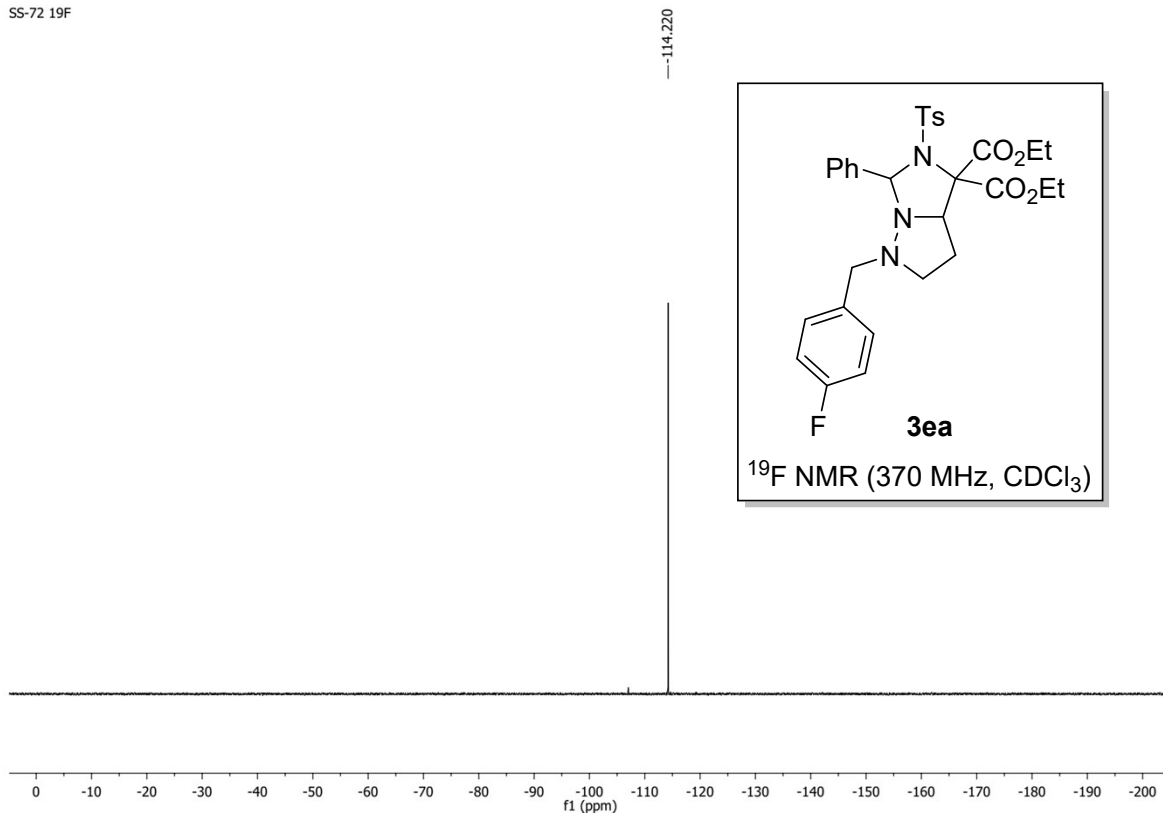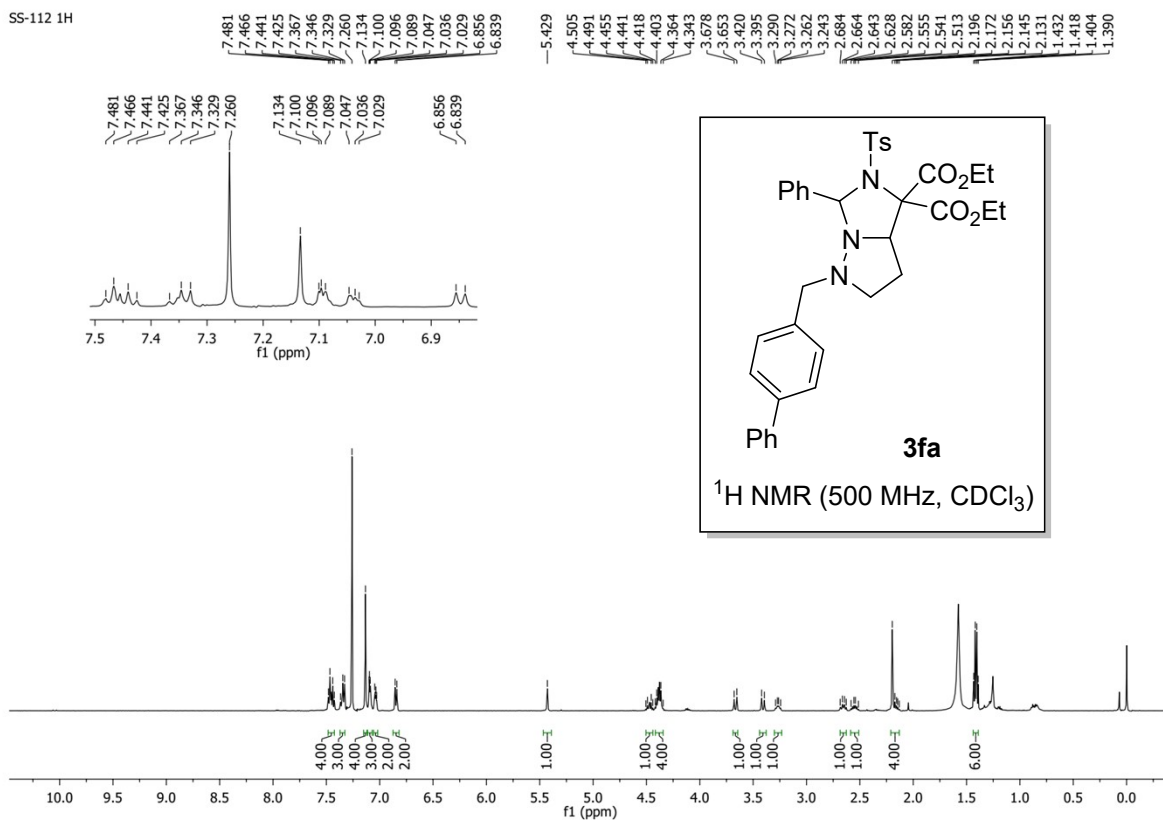

SS-112 13C

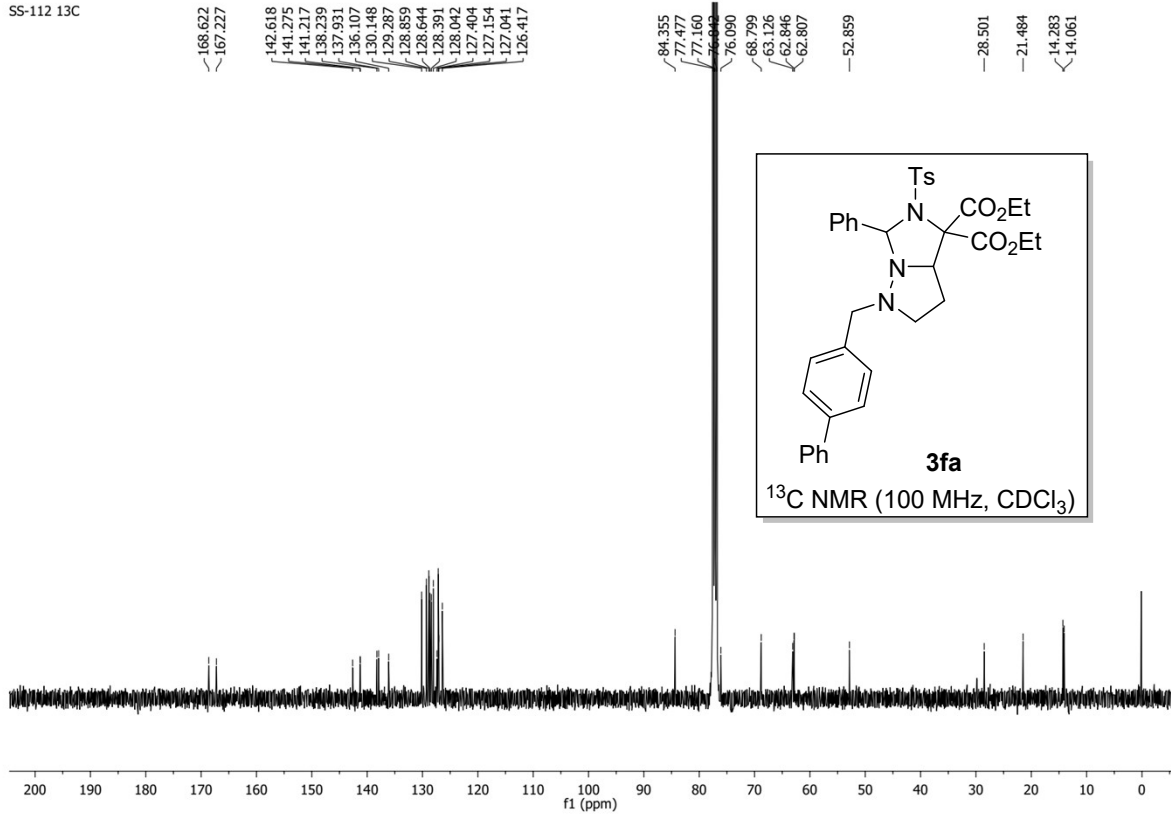

SS-176 1H

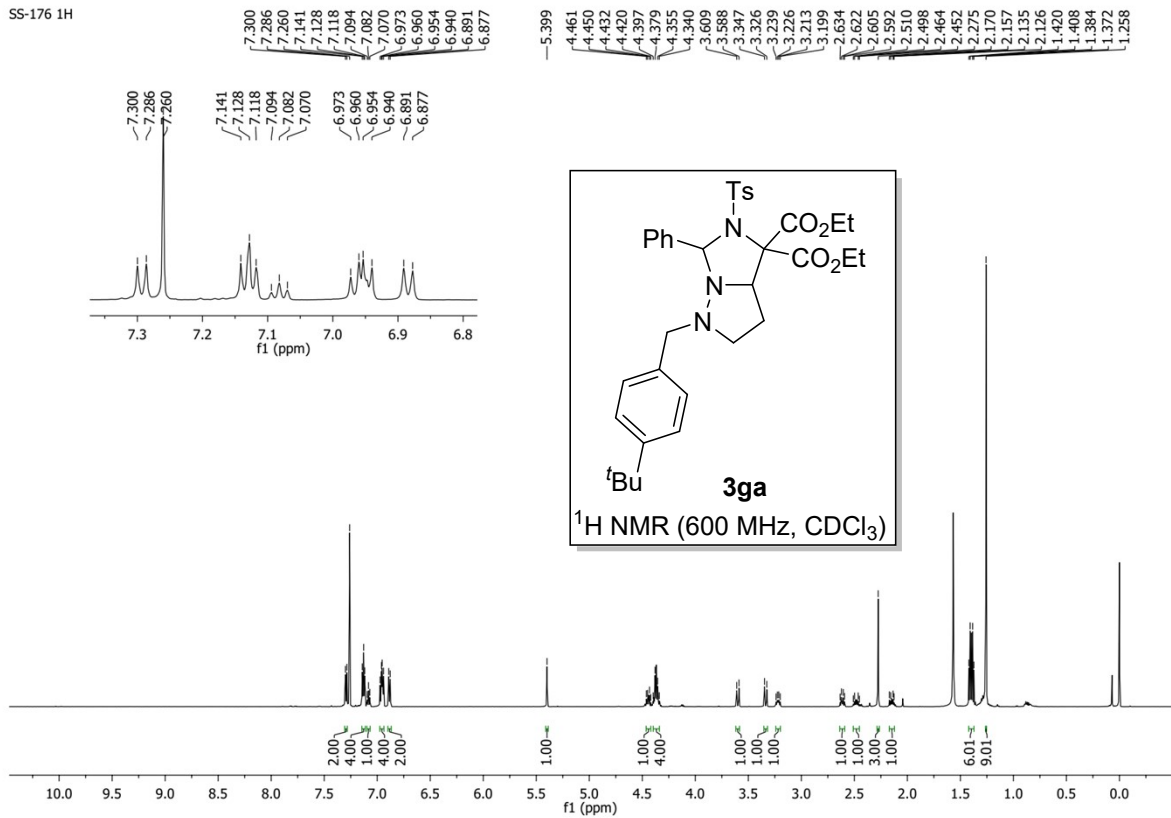

SS-176 13C

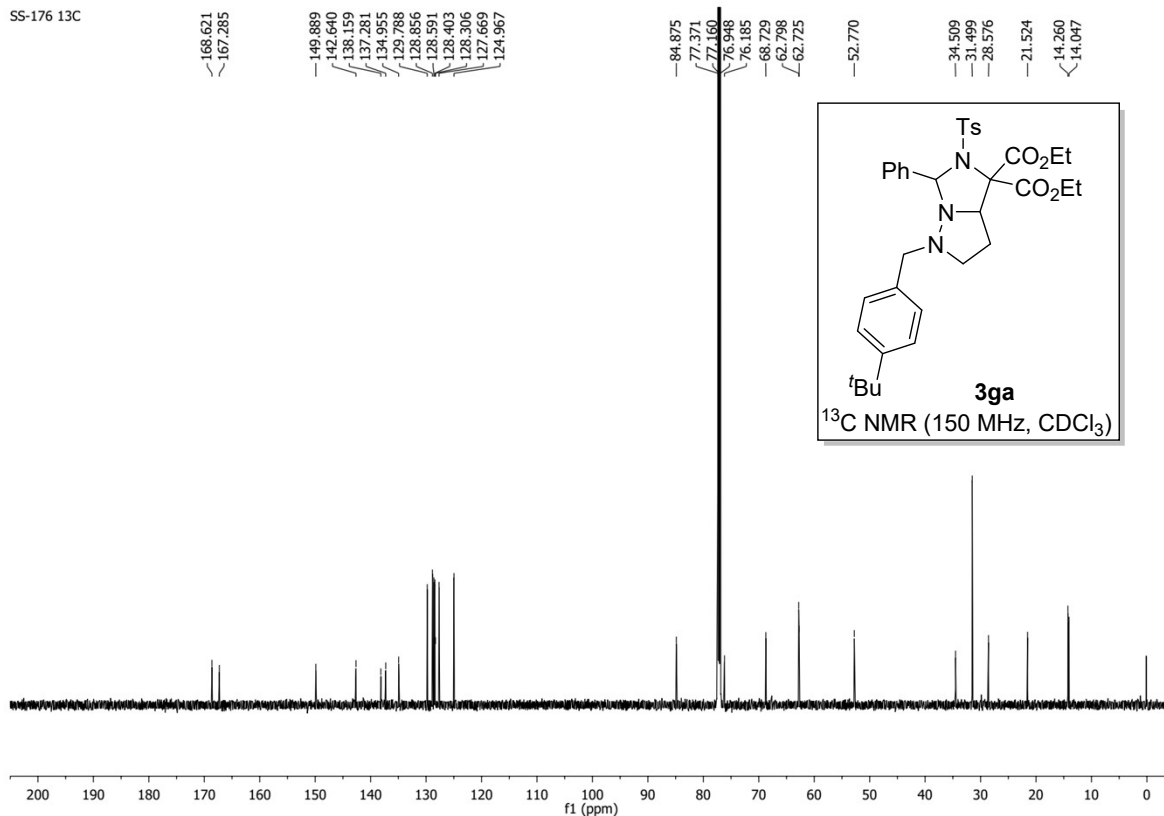

SS-148 1H

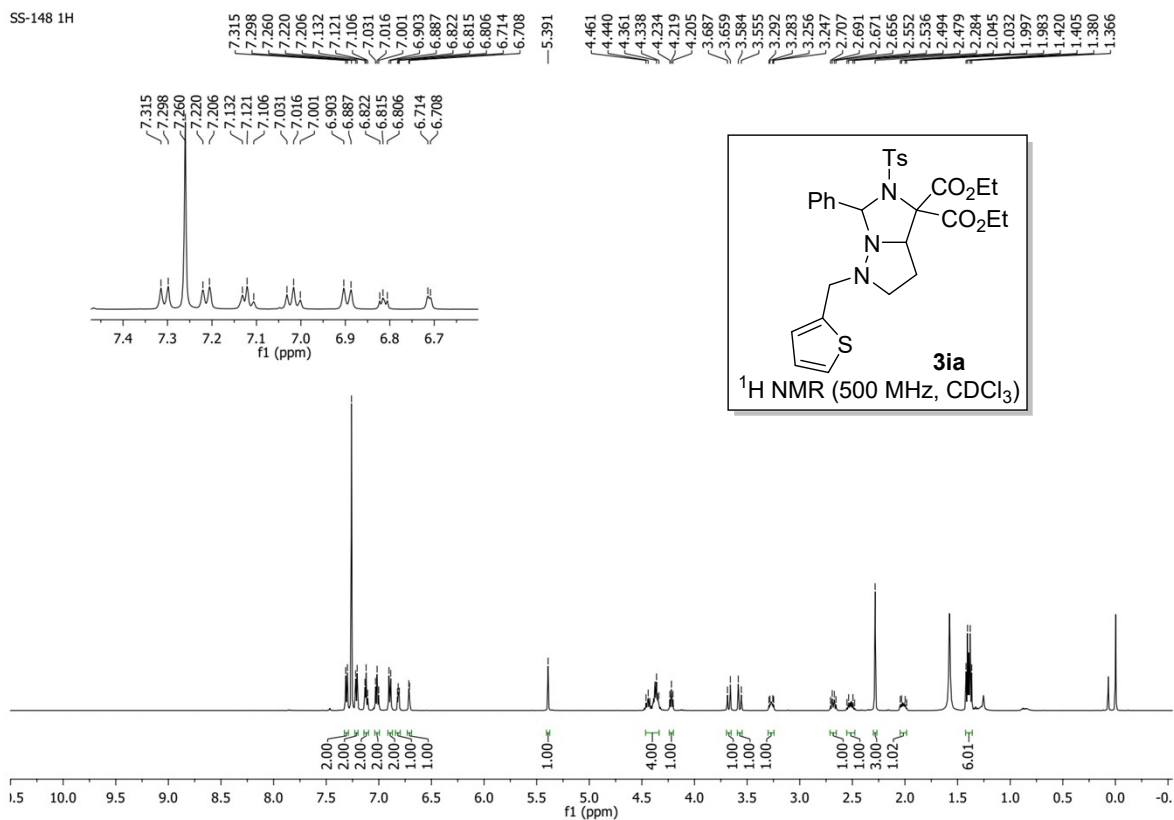

SS-148 13C

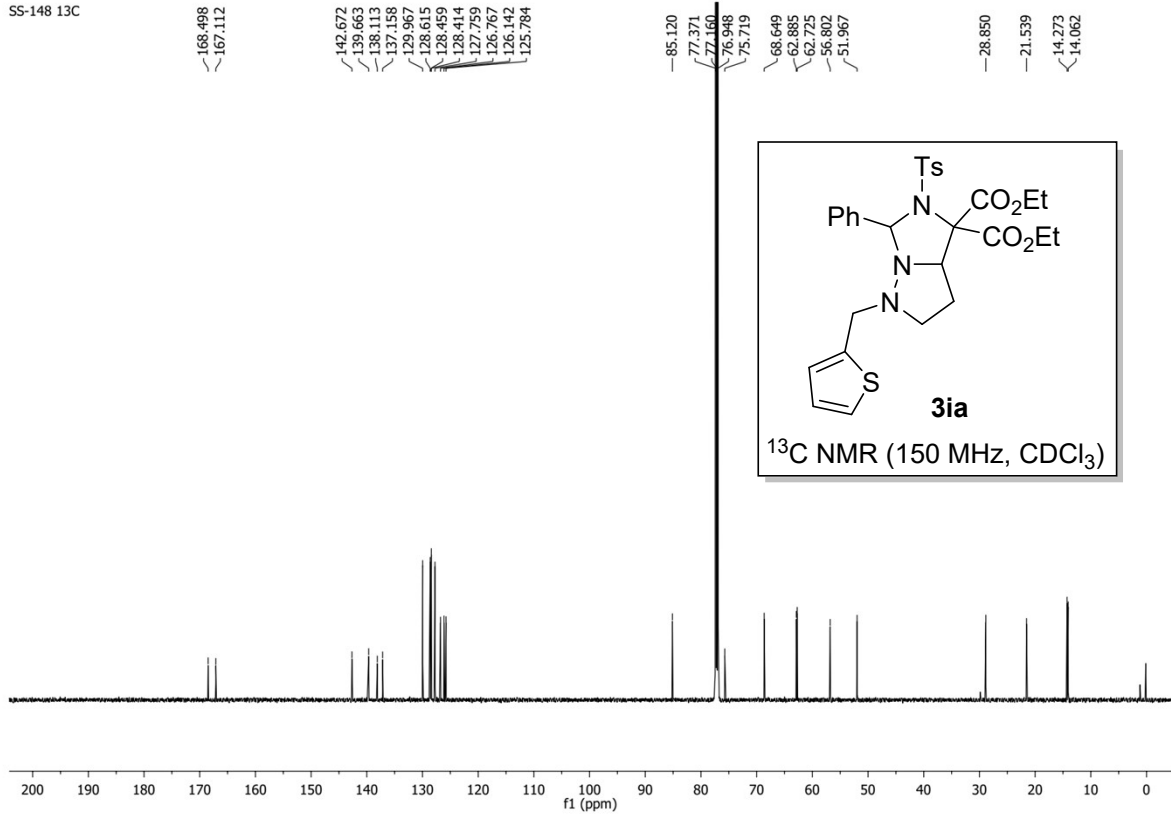

SS-175-A-1H

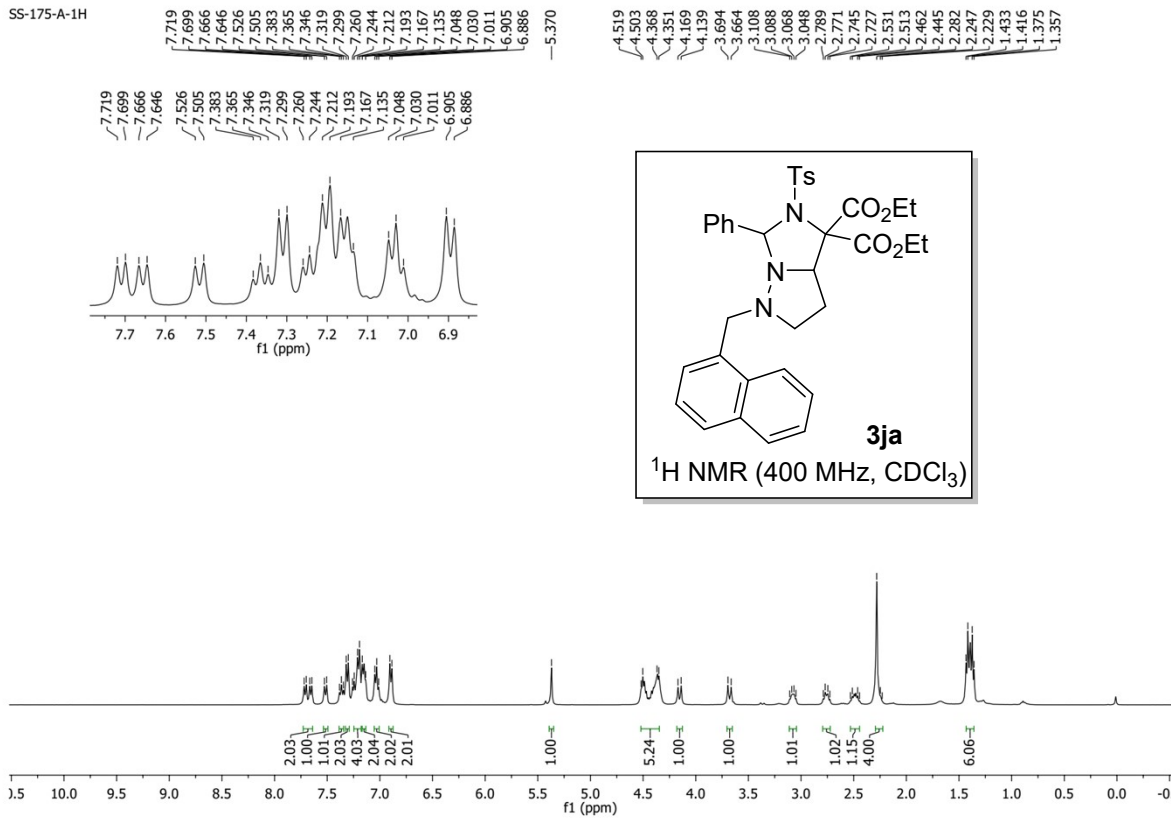

SS-175 13C

168.586  
167.282  
142.623  
138.030  
137.173  
133.716  
133.684  
132.219  
130.243  
129.624  
129.188  
128.539  
128.521  
128.481  
128.340  
128.131  
128.030  
127.665  
127.599  
127.531  
125.659  
125.517  
124.905

84.366  
77.478  
77.160  
76.842  
75.973  
67.825  
62.776  
62.701  
61.808

52.209

28.850

21.462

14.225  
13.970

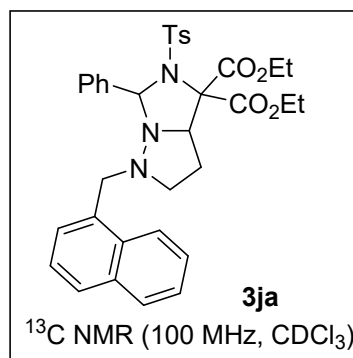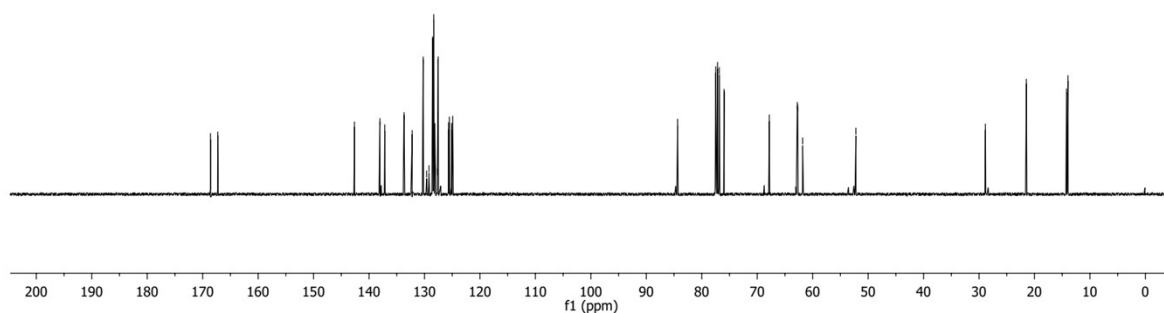

SS-151-A-1H

7.738  
7.717  
7.671  
7.648  
7.571  
7.550  
7.436  
7.417  
7.402  
7.356  
7.273  
7.417  
7.273  
7.394  
7.171  
7.273  
7.150  
7.074  
7.260  
7.171  
7.054  
7.150  
6.967  
7.074  
6.985  
6.948  
6.869  
6.848  
6.828  
6.810  
5.418  
4.489  
4.472  
4.445  
4.427  
4.427  
4.394  
4.376  
4.358  
4.331  
3.795  
3.764  
3.542  
3.511  
3.278  
3.254  
3.239  
3.219  
2.720  
2.702  
2.678  
2.658  
2.560  
2.544  
2.491  
2.474  
2.252  
2.214  
2.195  
2.162  
2.149  
1.425  
1.407  
1.371  
1.353

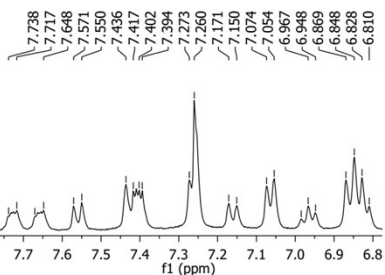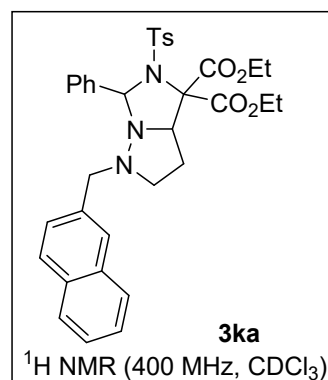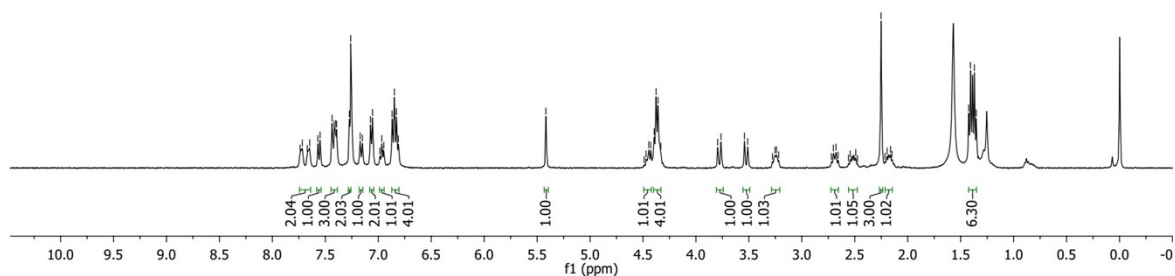



SS-151 13C

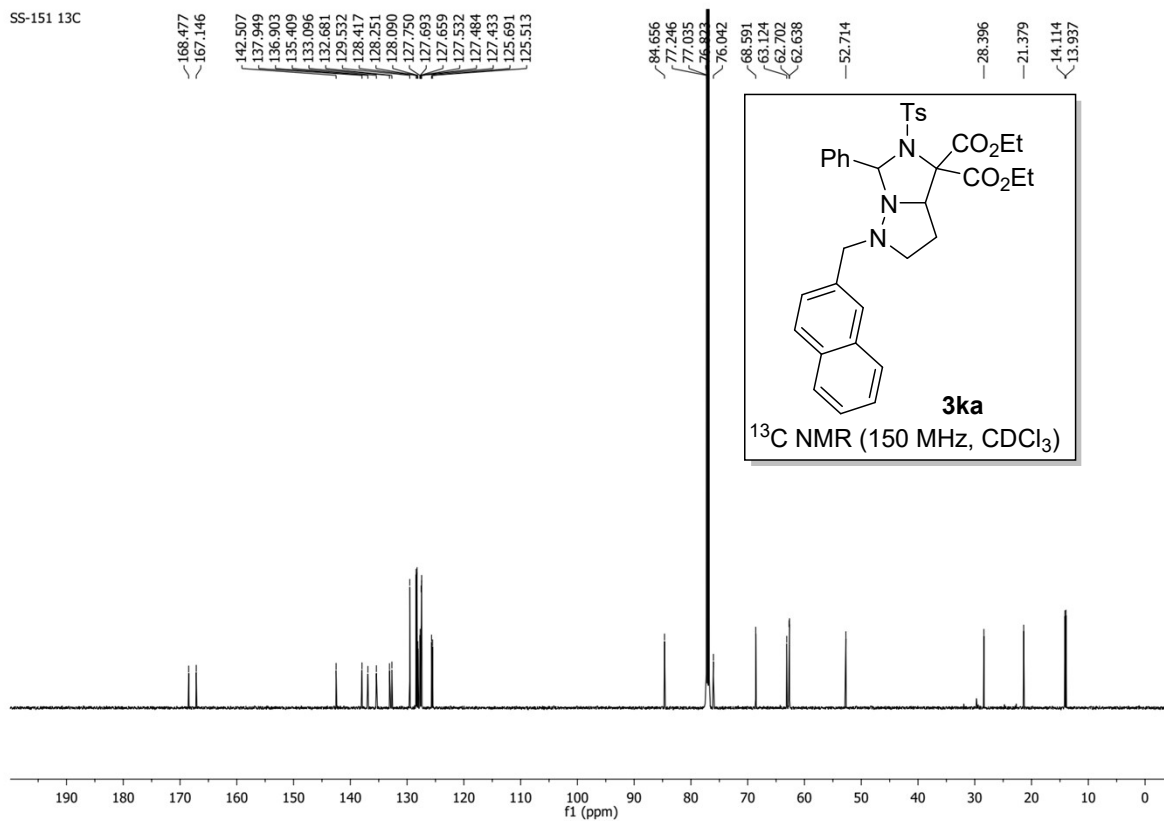

SS-145 1H

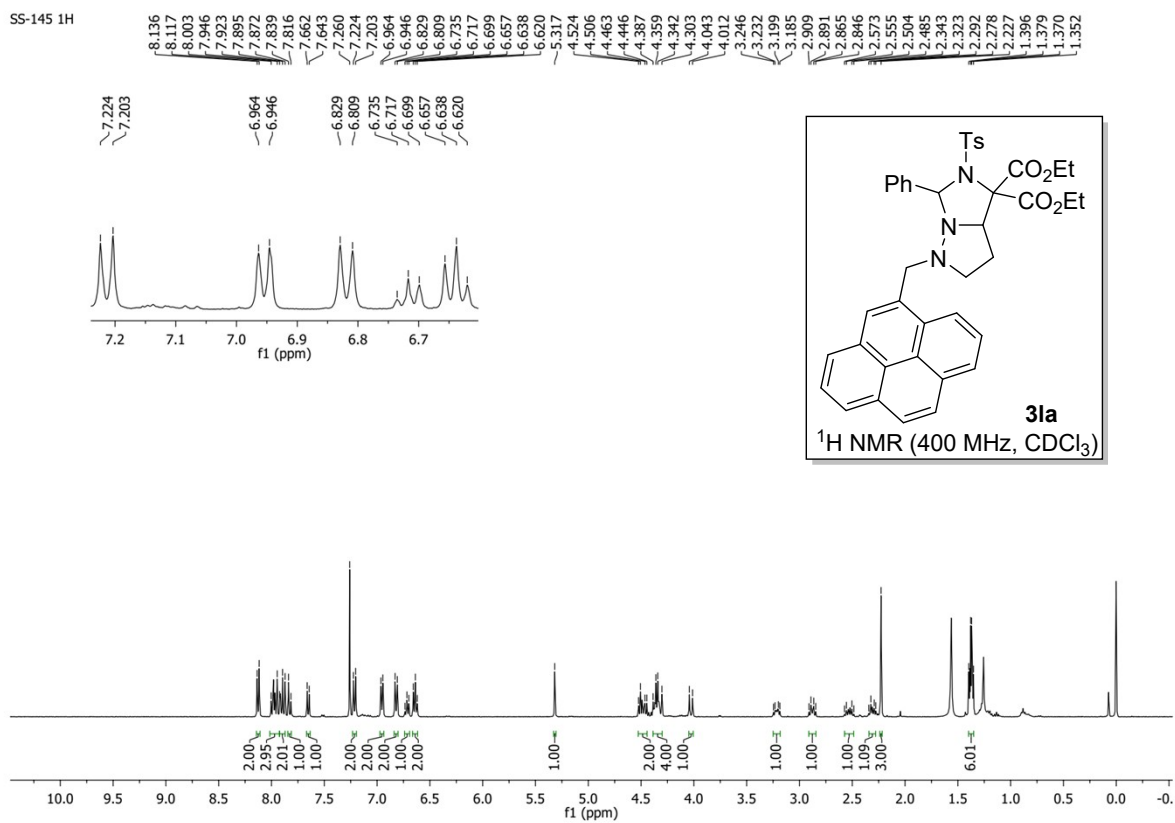

SS-145 13C

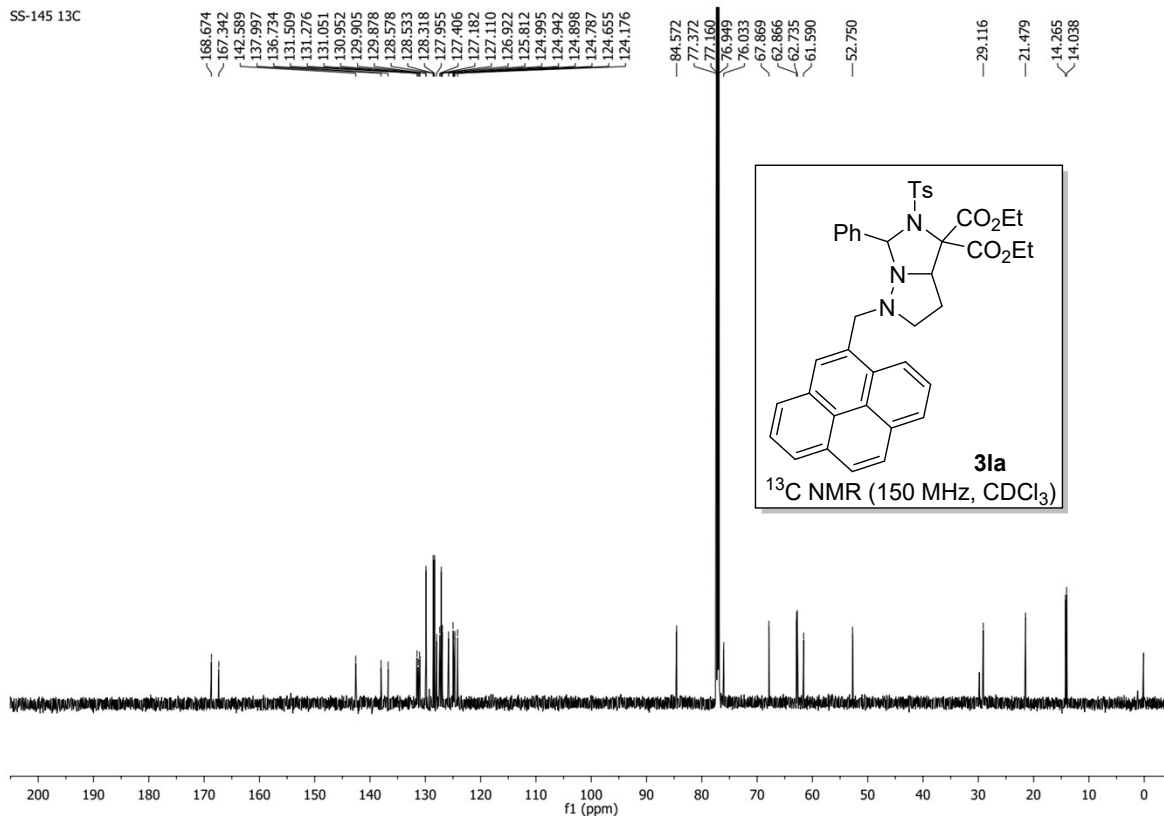

SS-155-A-1H

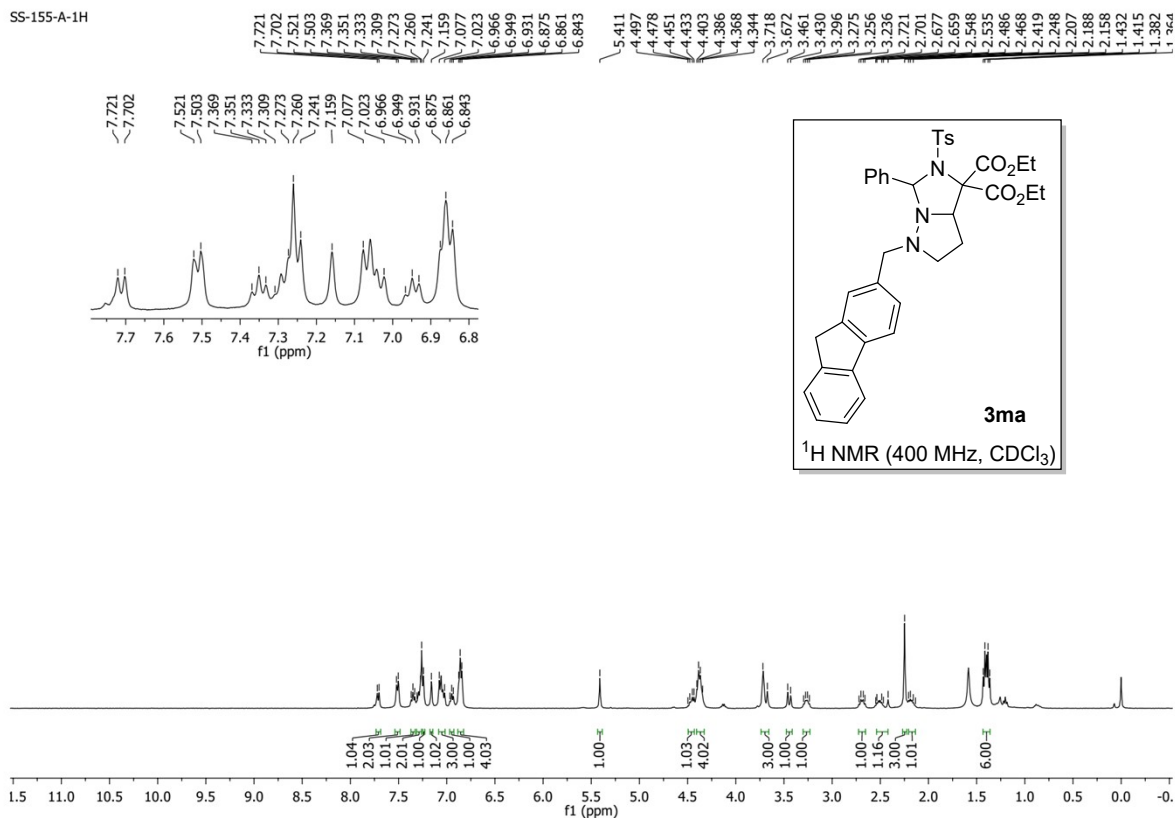

SS-155 13C

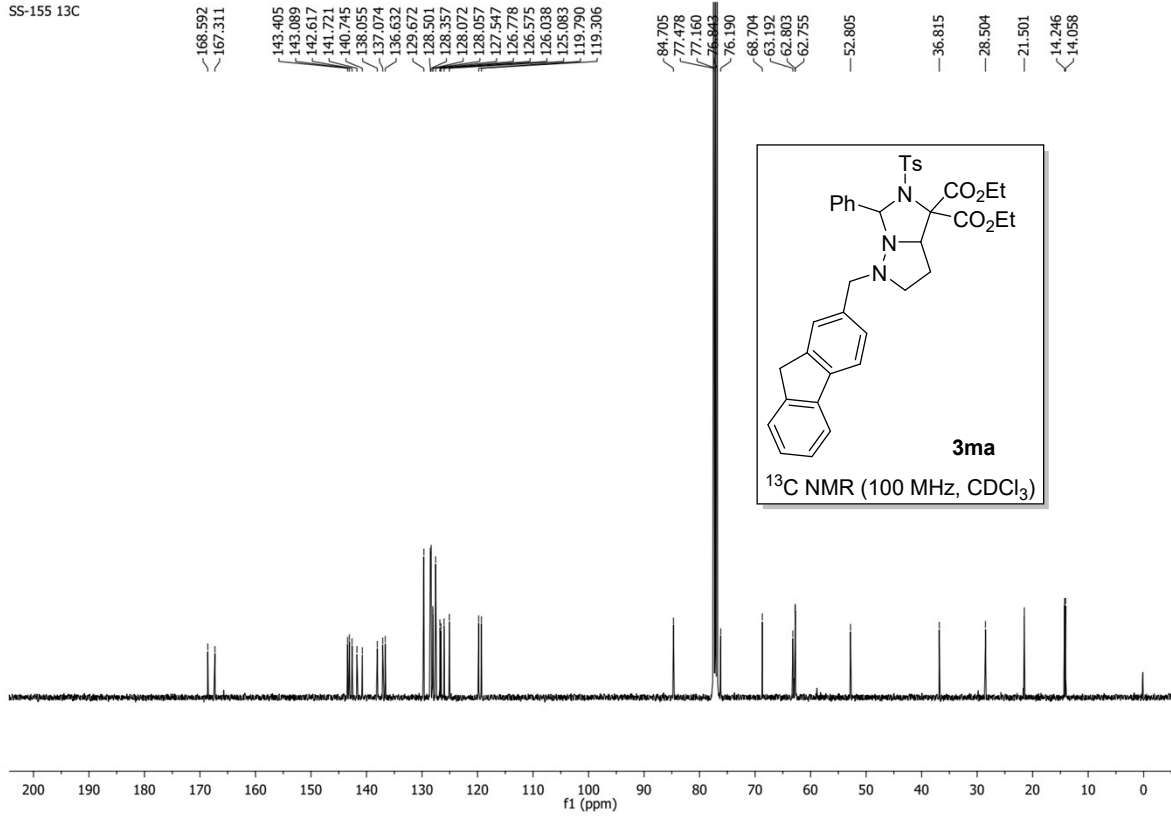

SS-225 1H

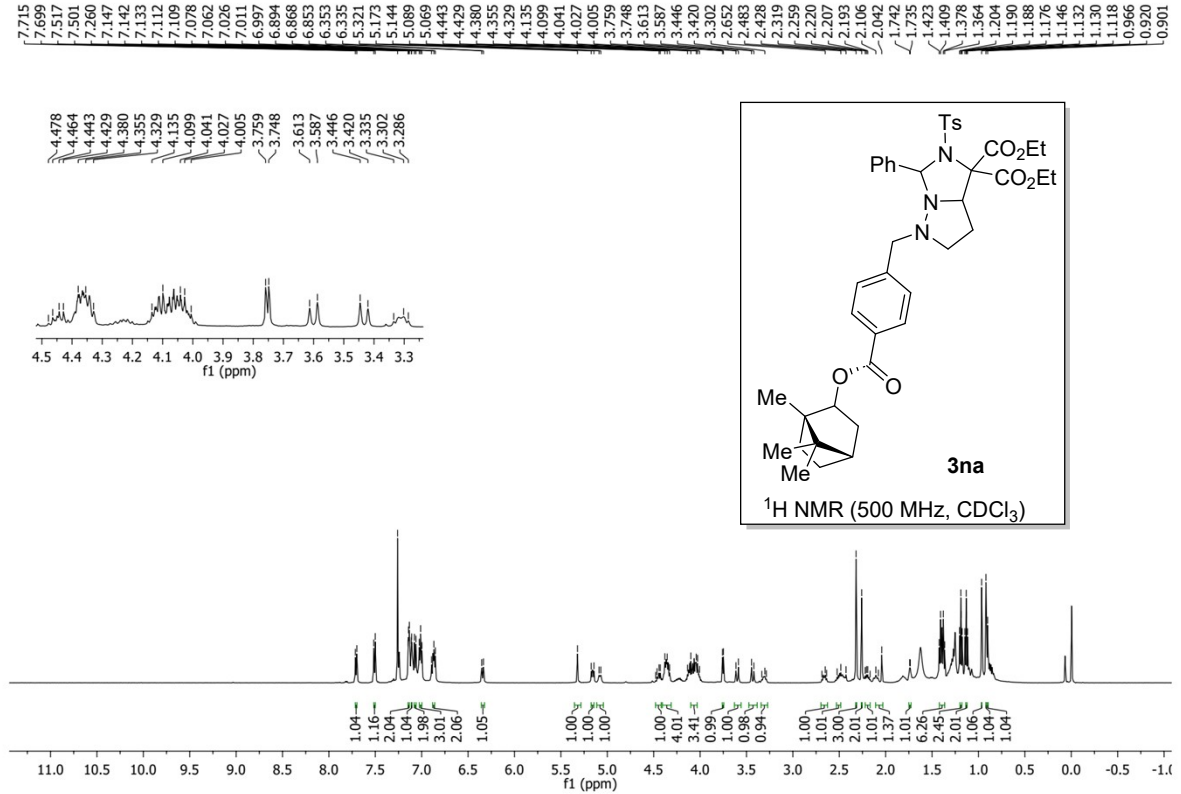

SS-225 13C

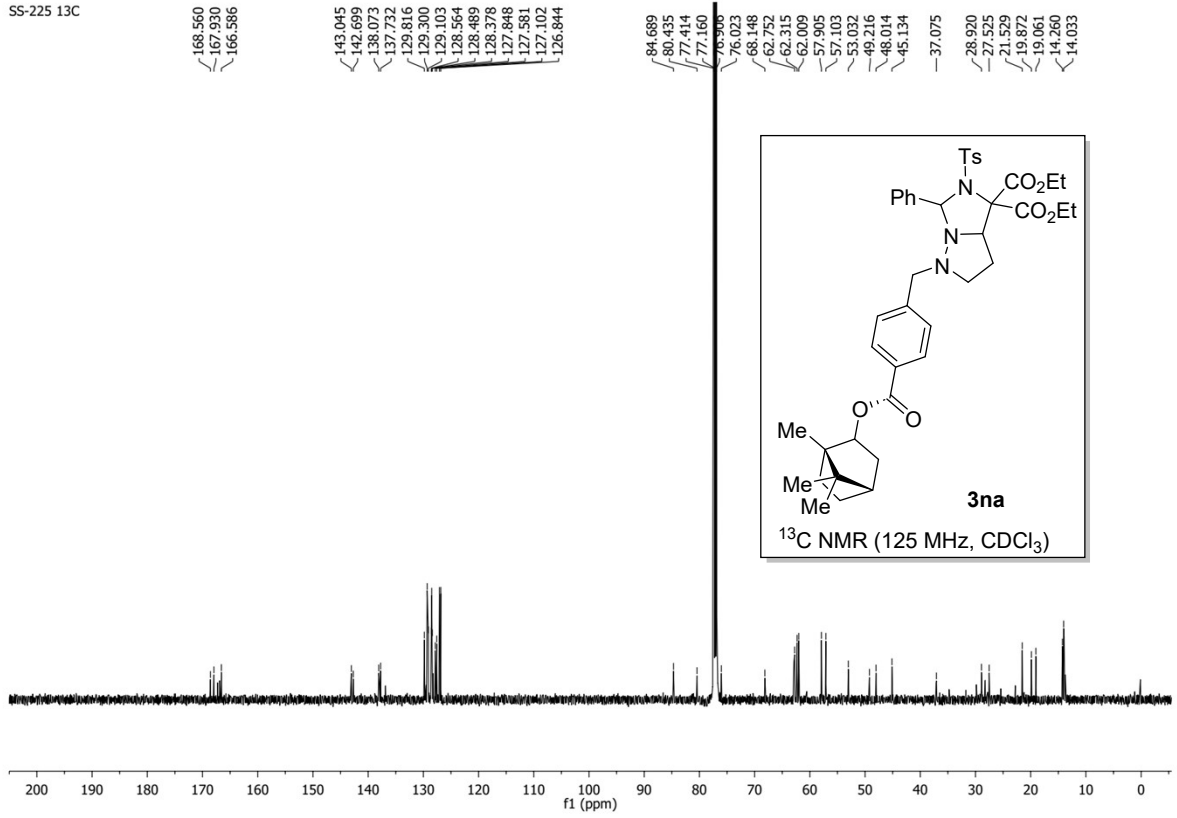

SS-228-A-1H

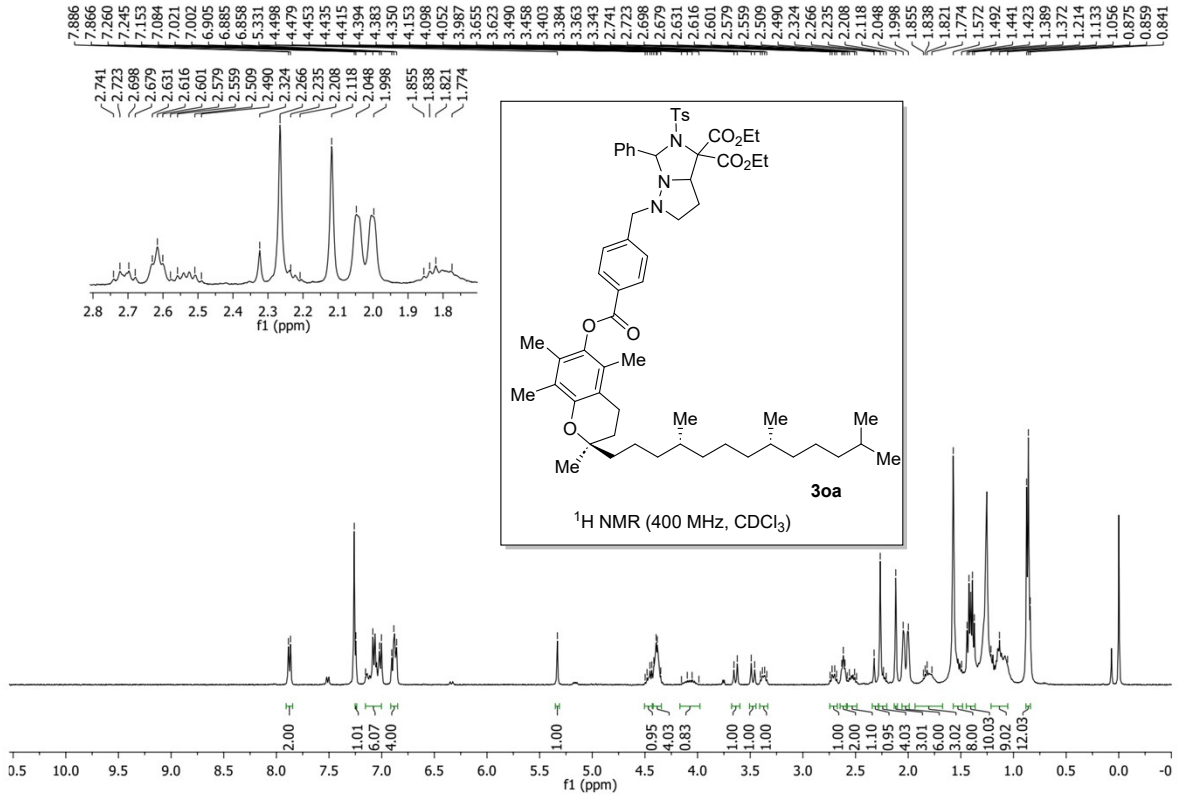

SS-228-A-13C

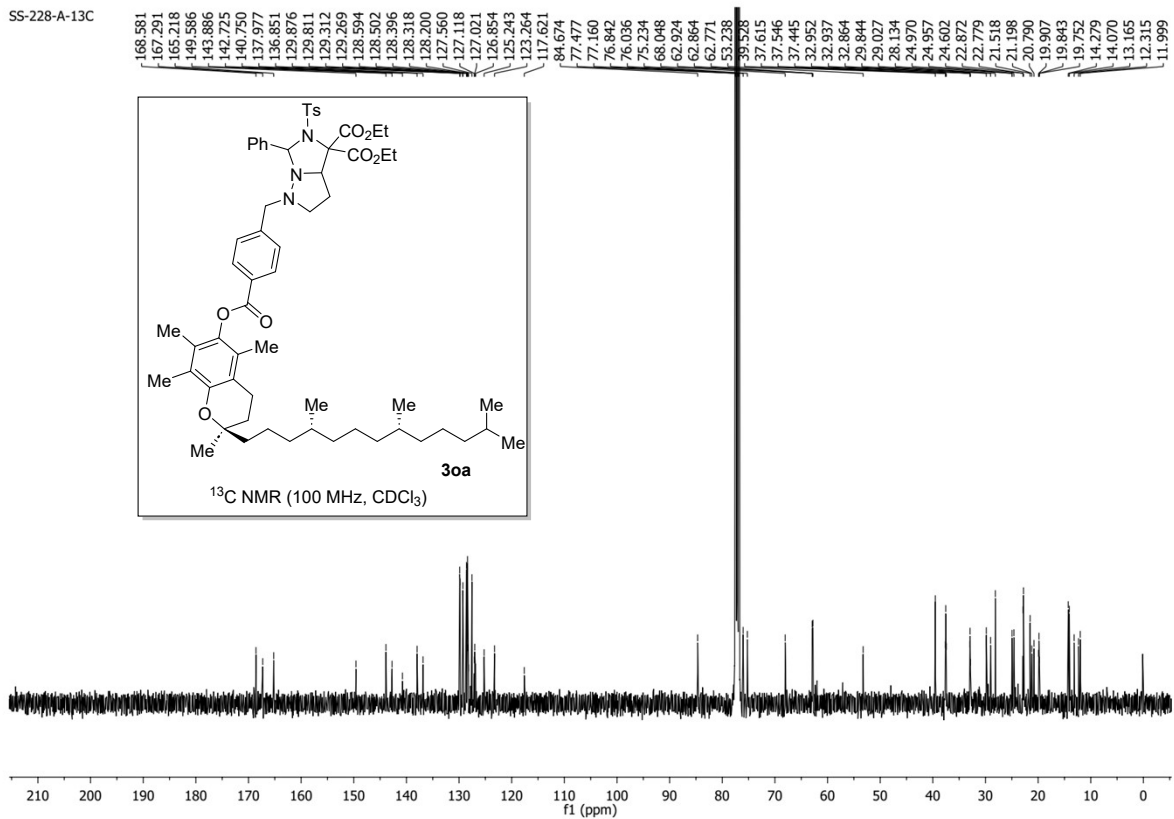

SS-224 1H

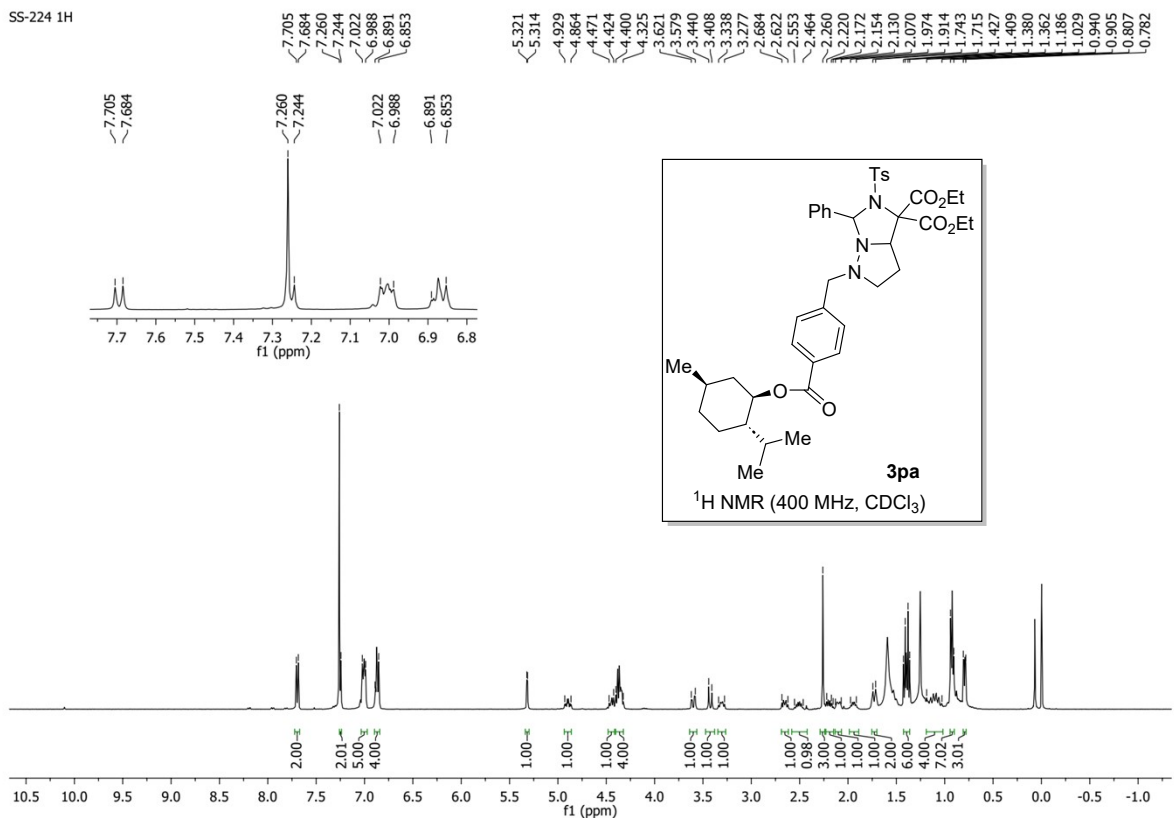

SS-224 13C

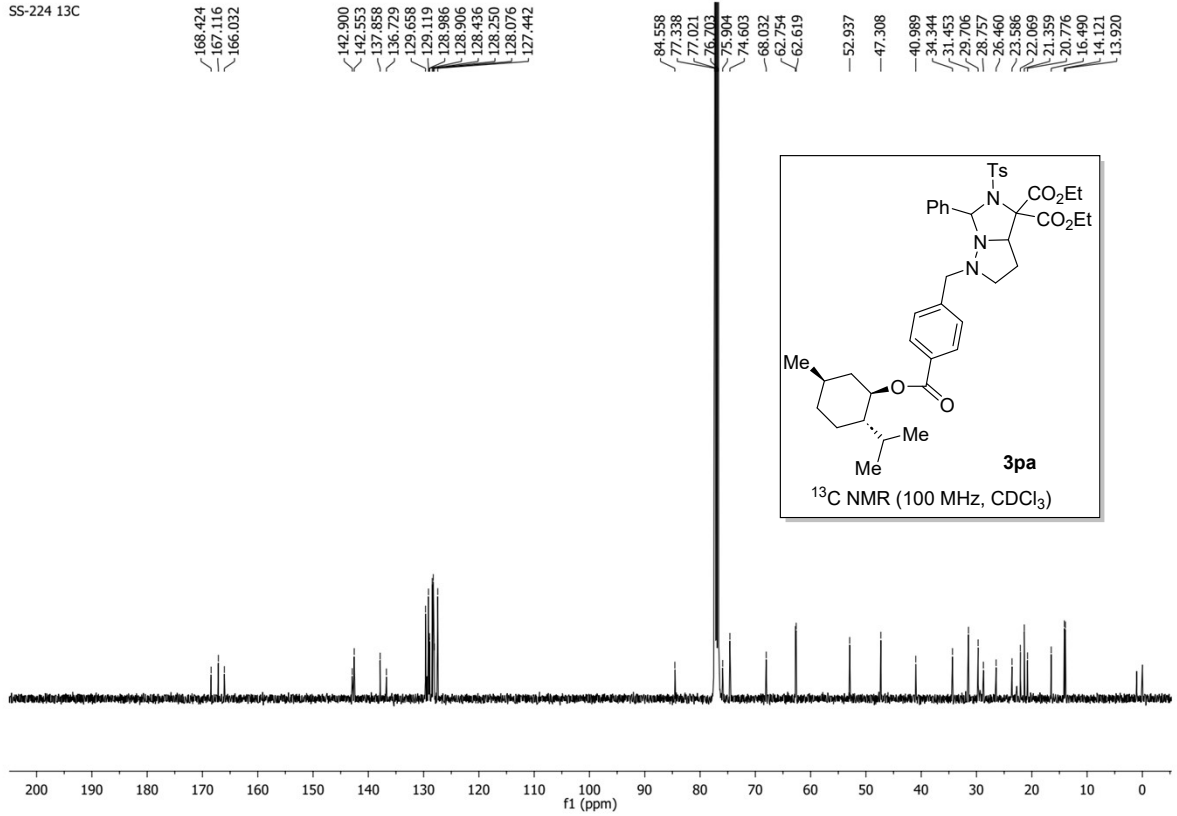

SS-96-A-1H

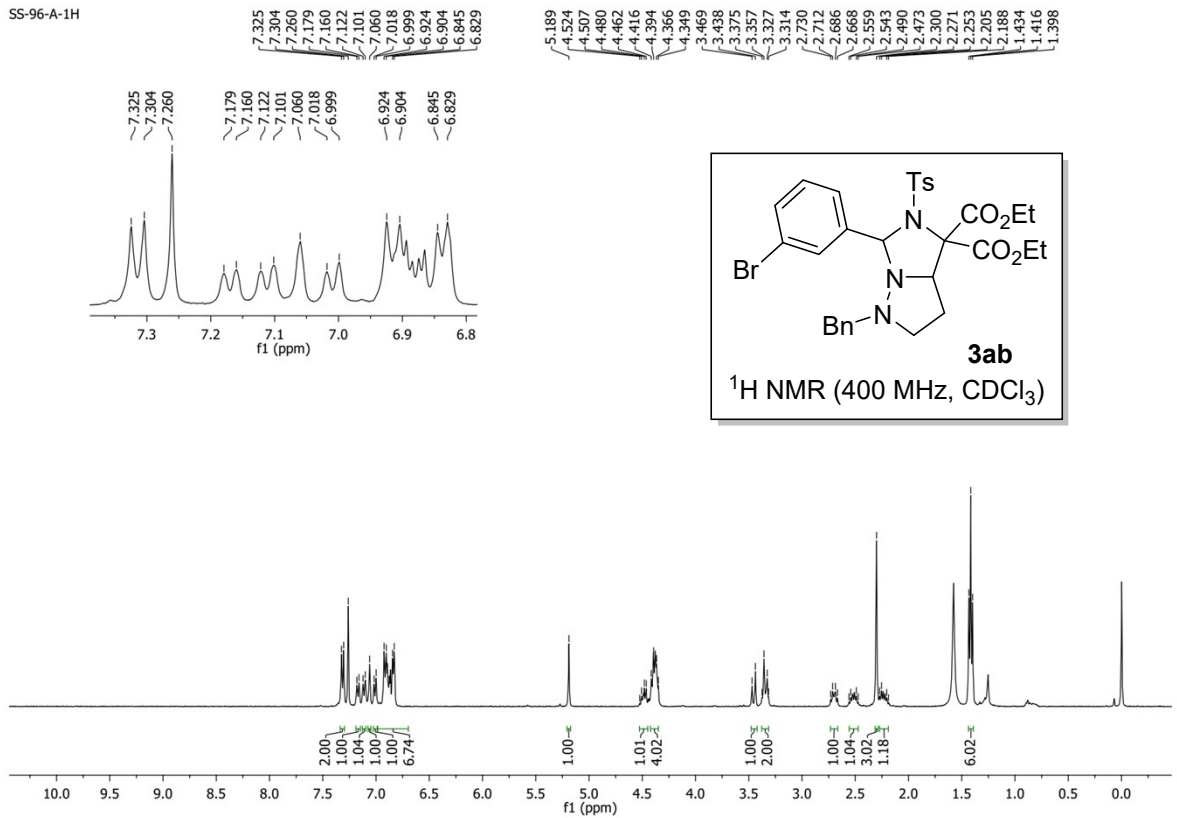

SS-96 13C

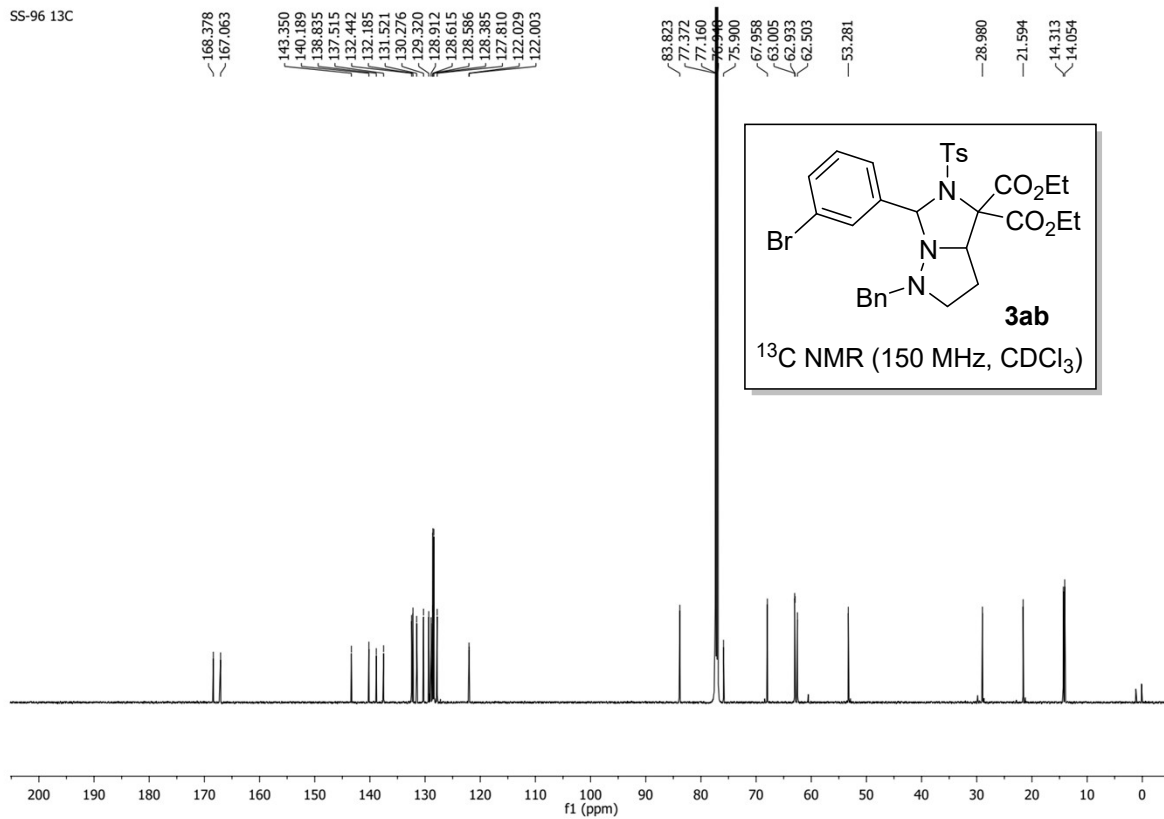

SS-158 1H

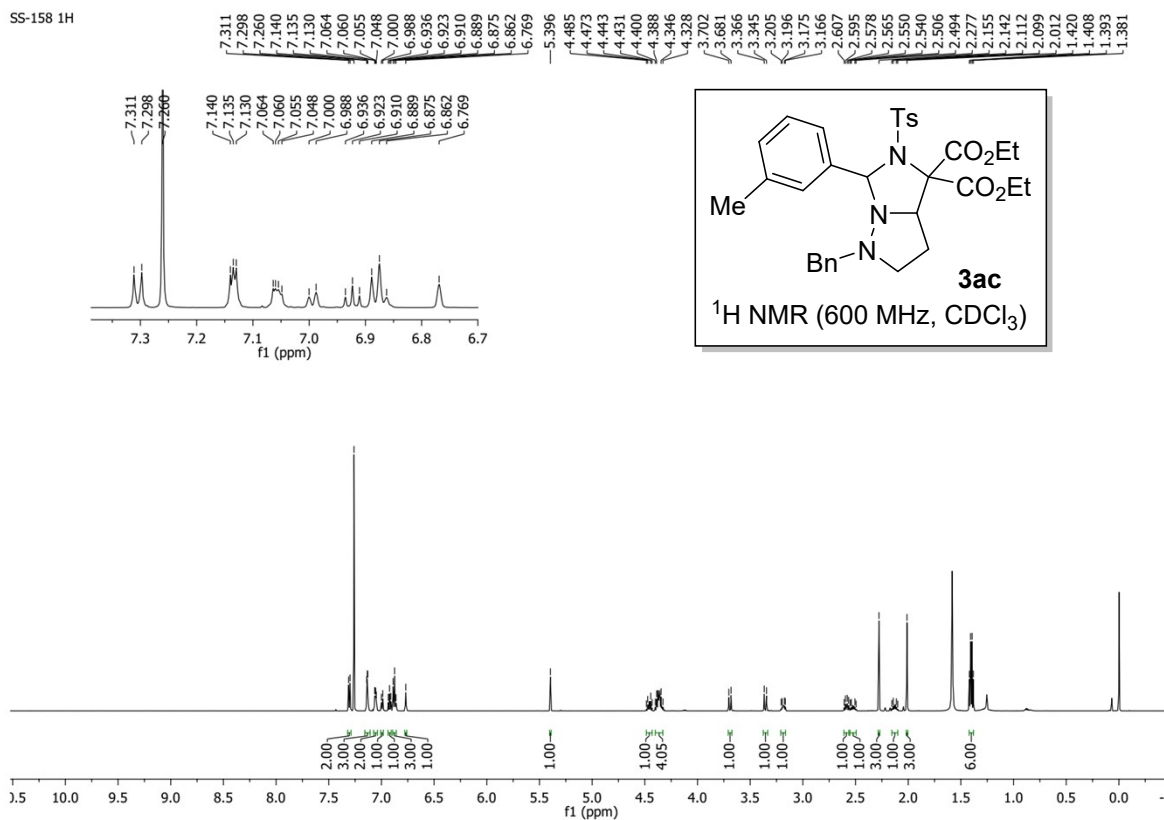

SS-158 13C

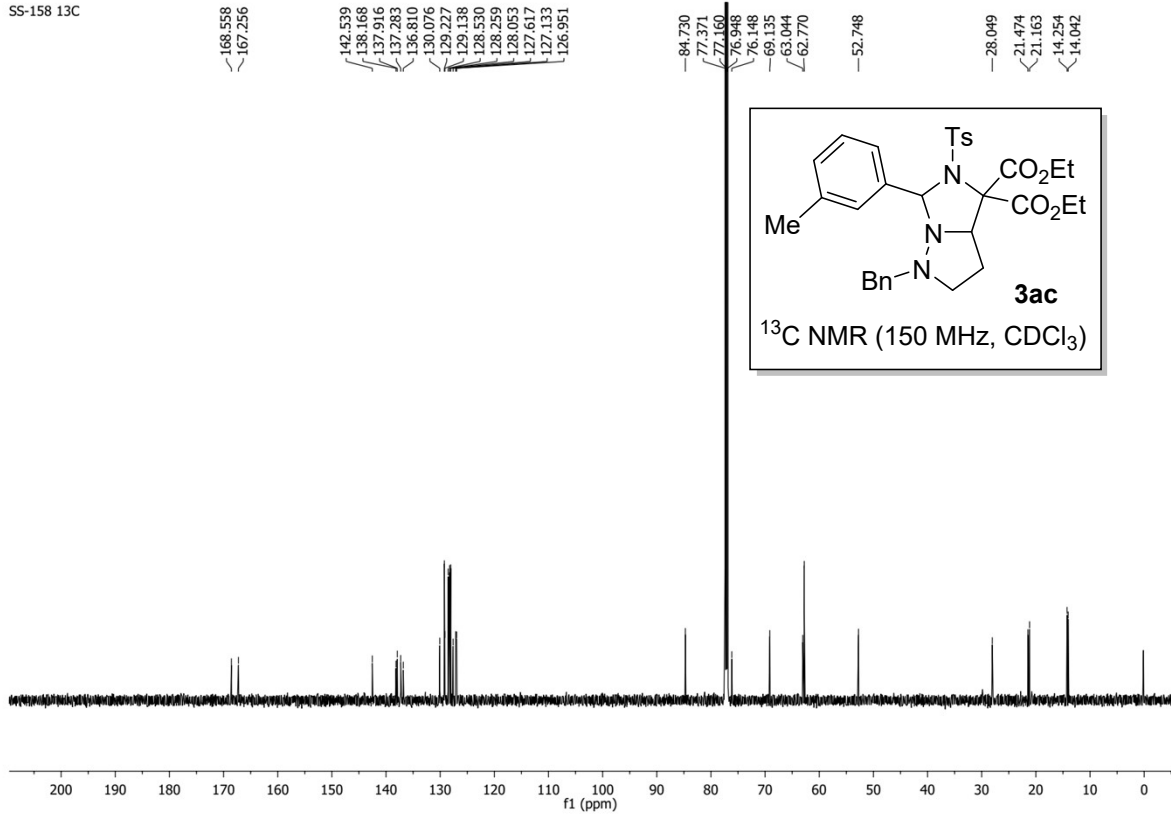

SS-87 1H

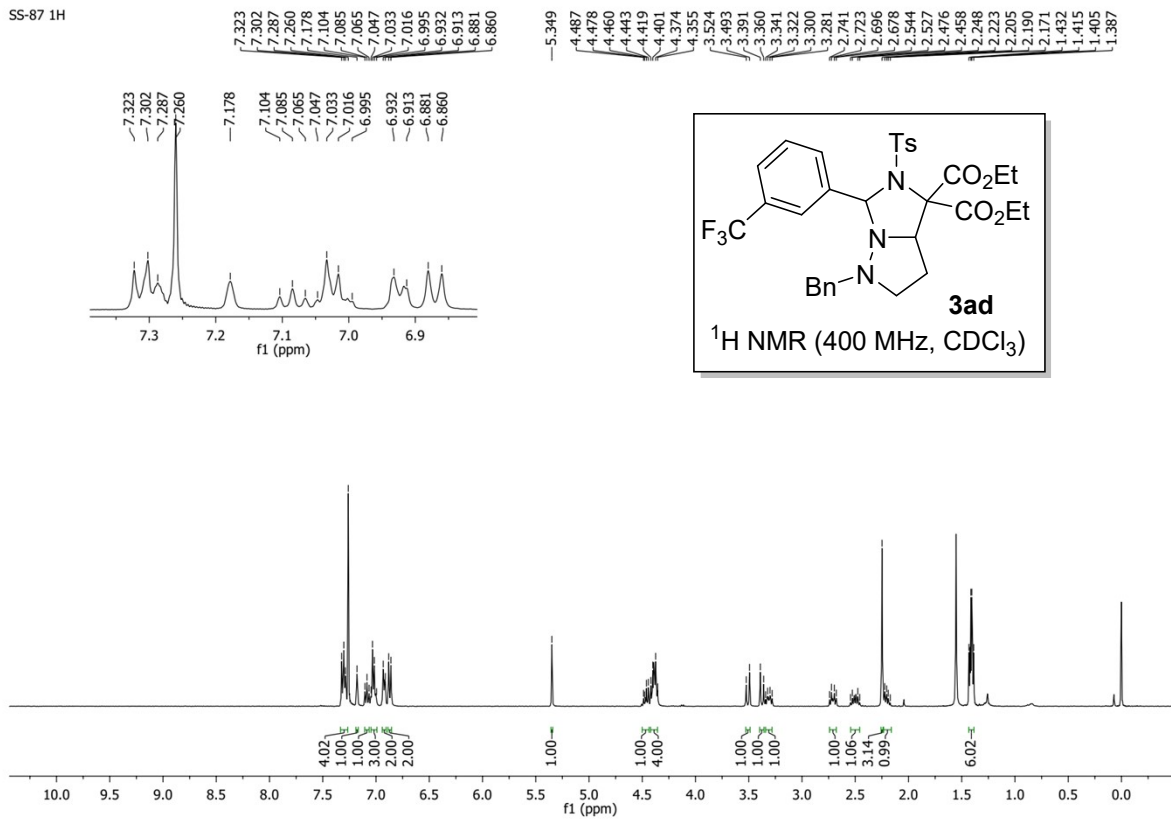



SS-87 13C

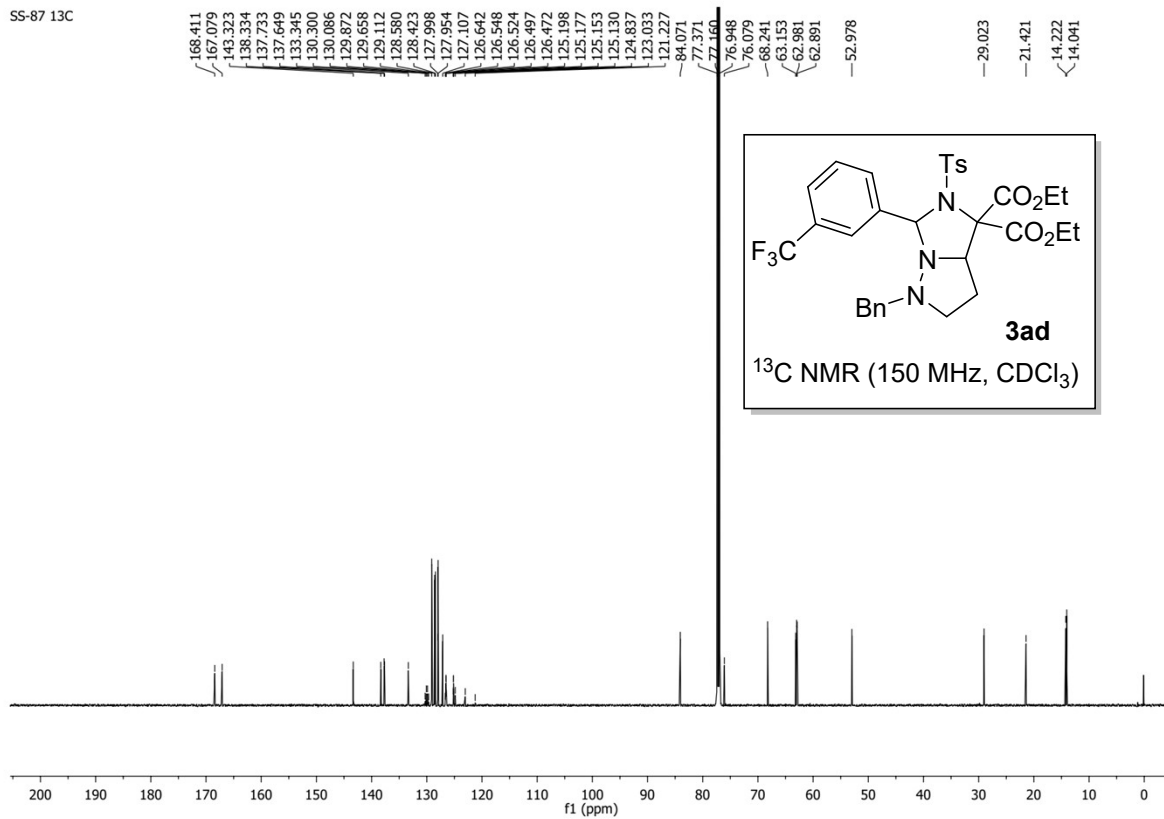

SS-87 19F

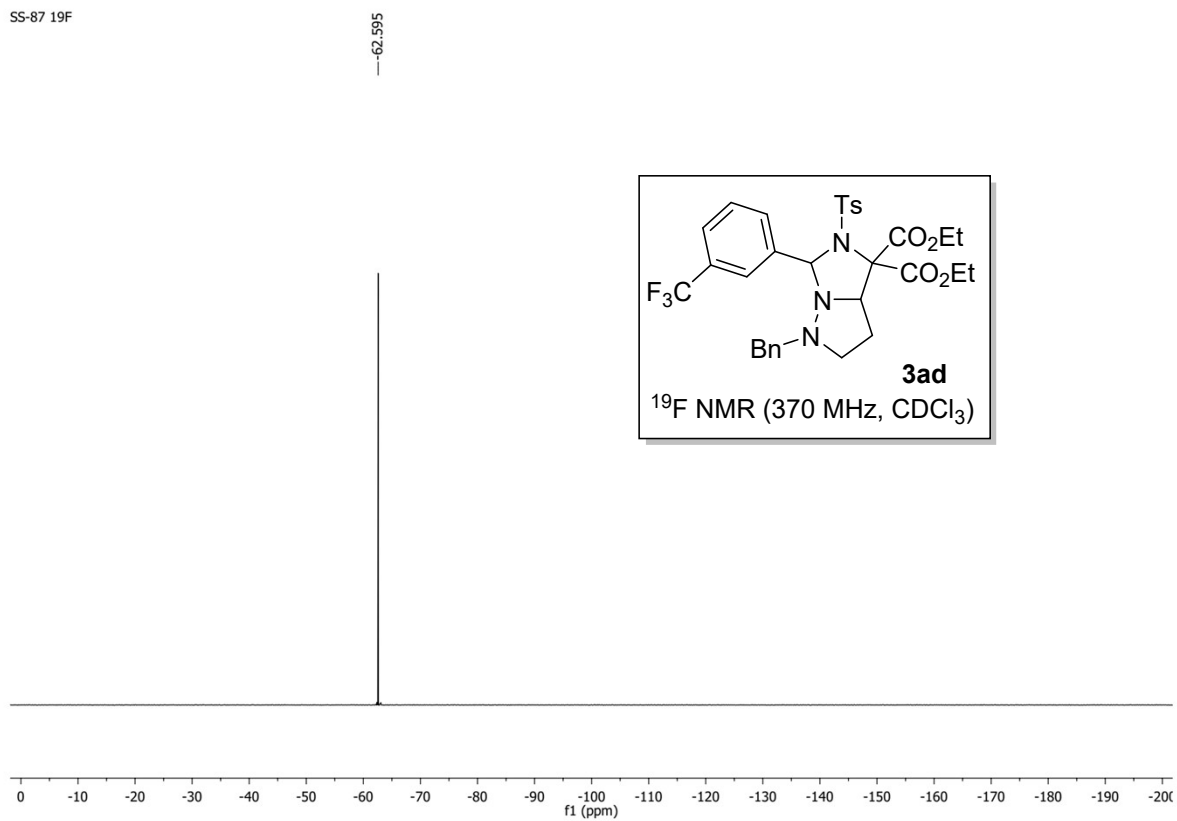

SS-152 1H

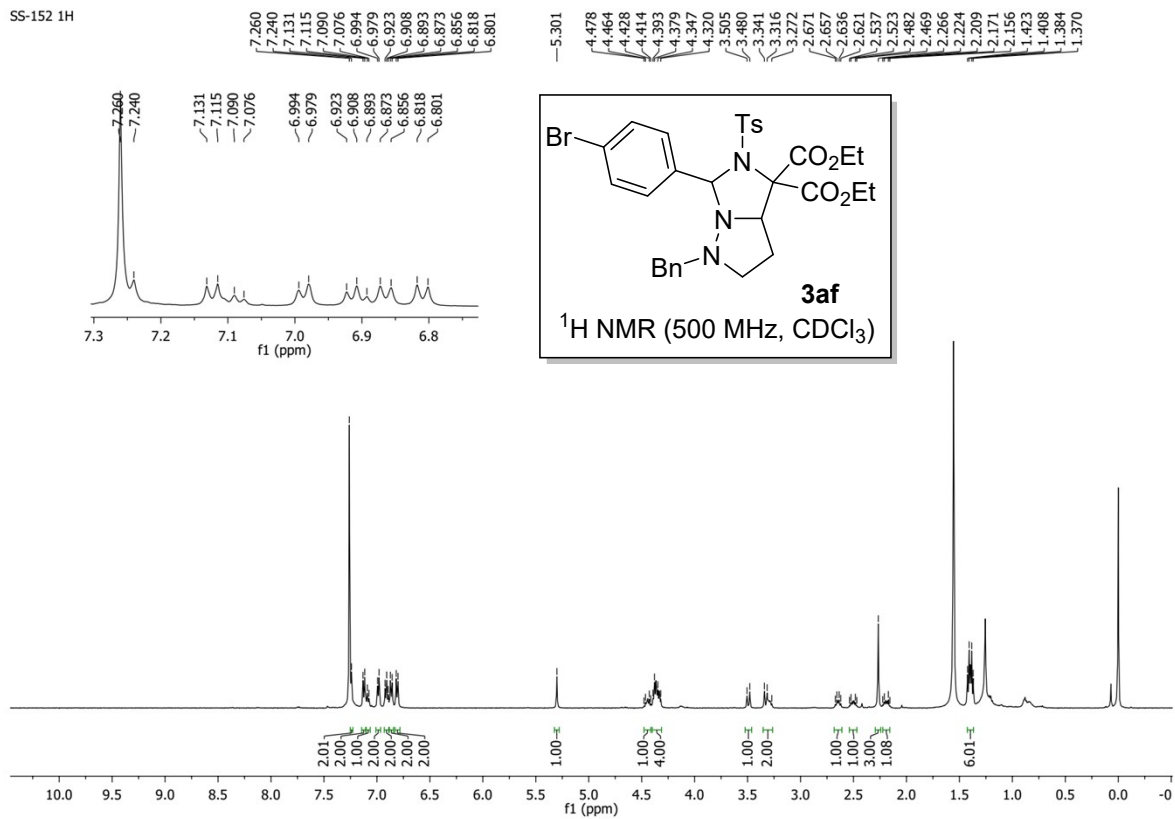

SS-152 13C

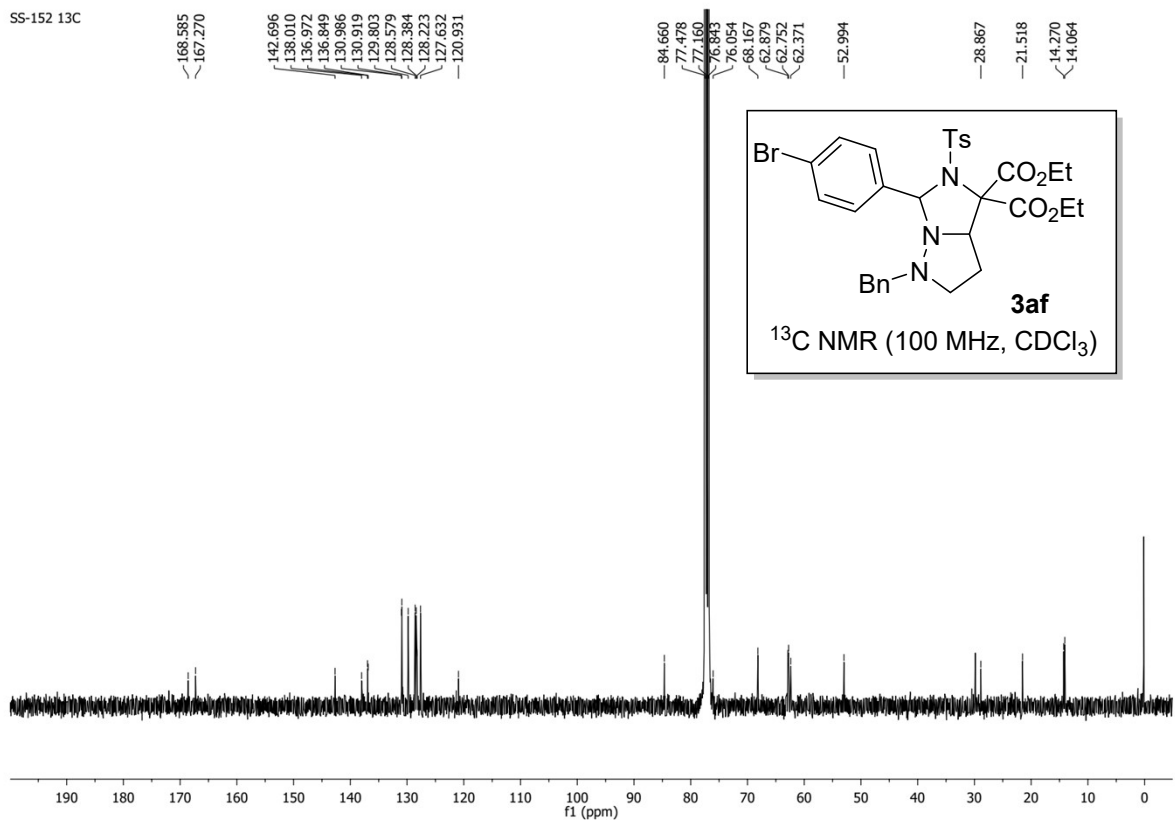

SS-76-A-1H

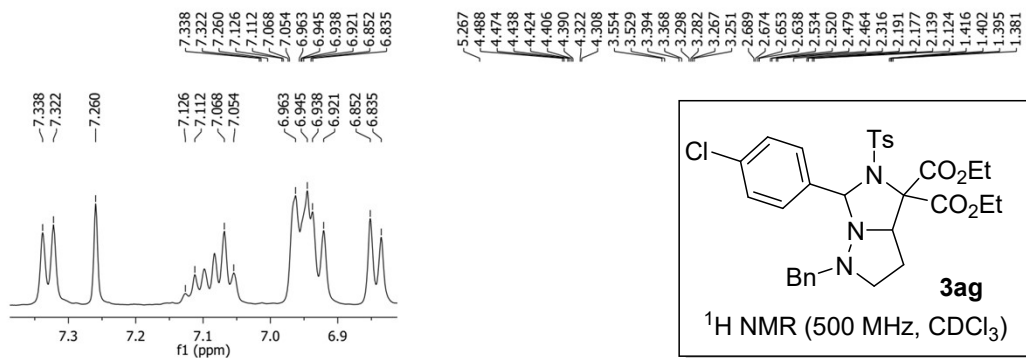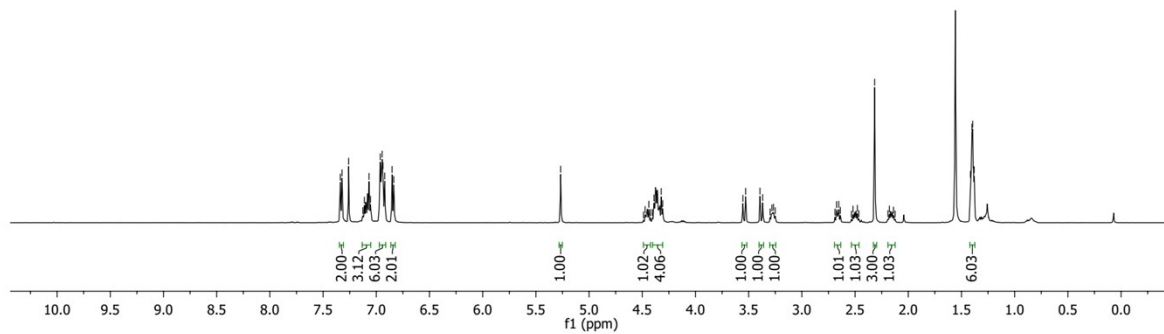

SS-76 13C

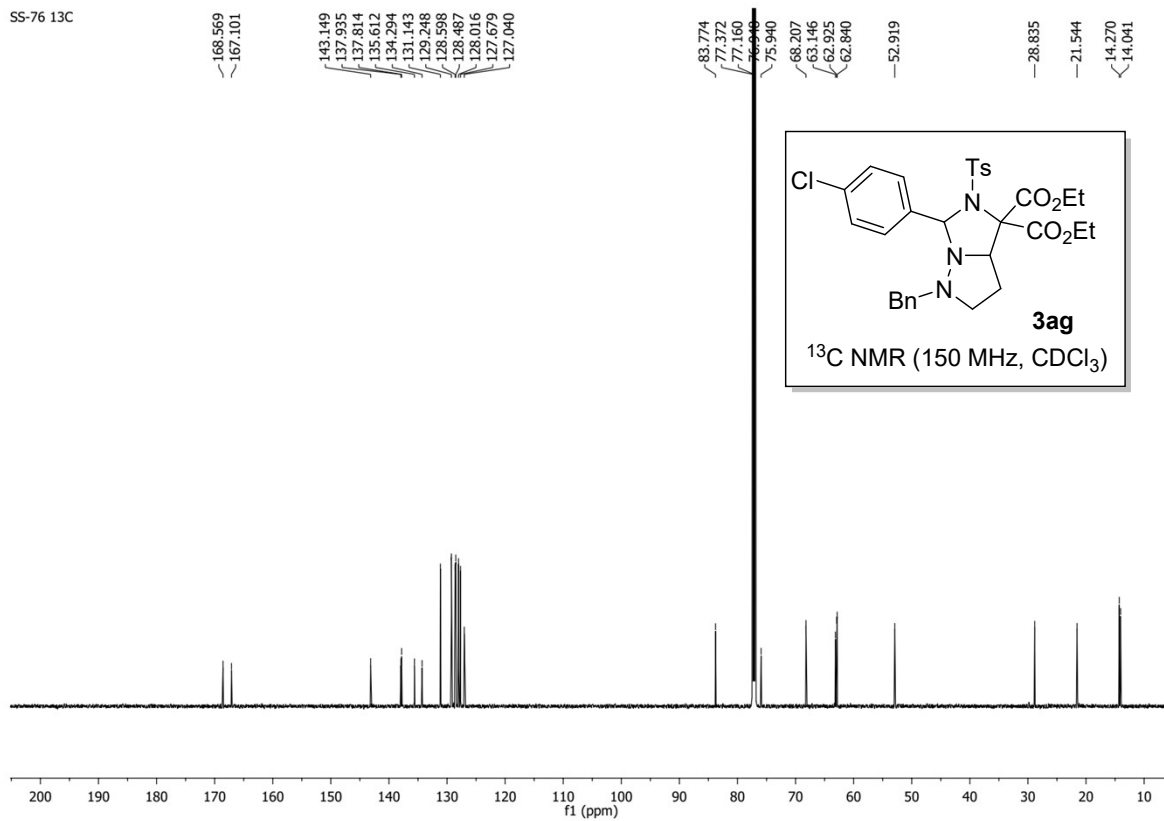

SS-63 1H

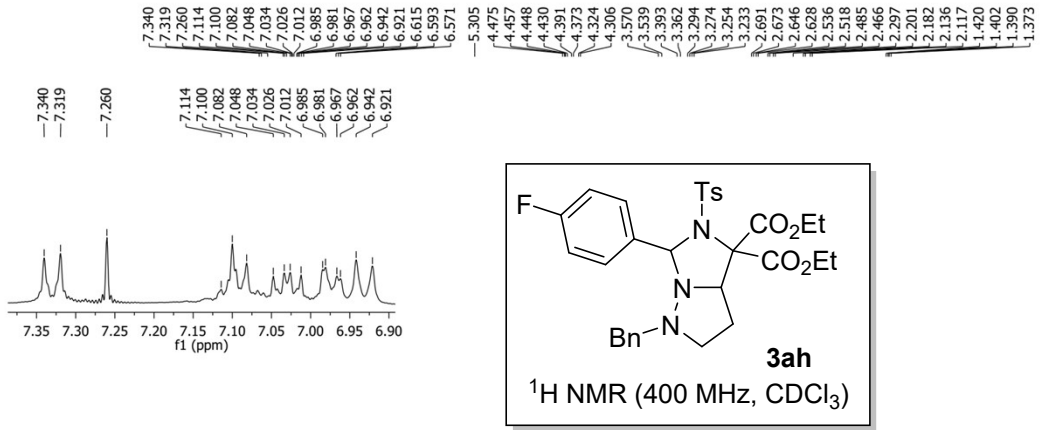

SS-63 13C

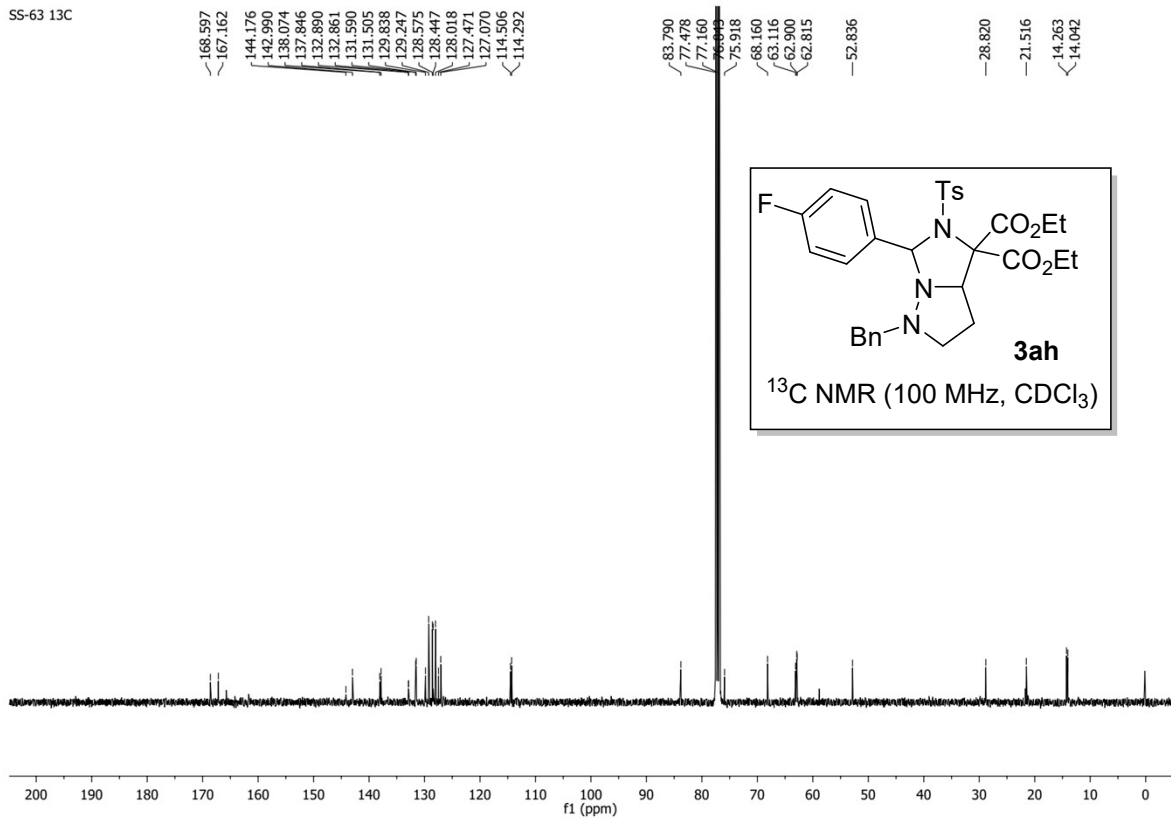

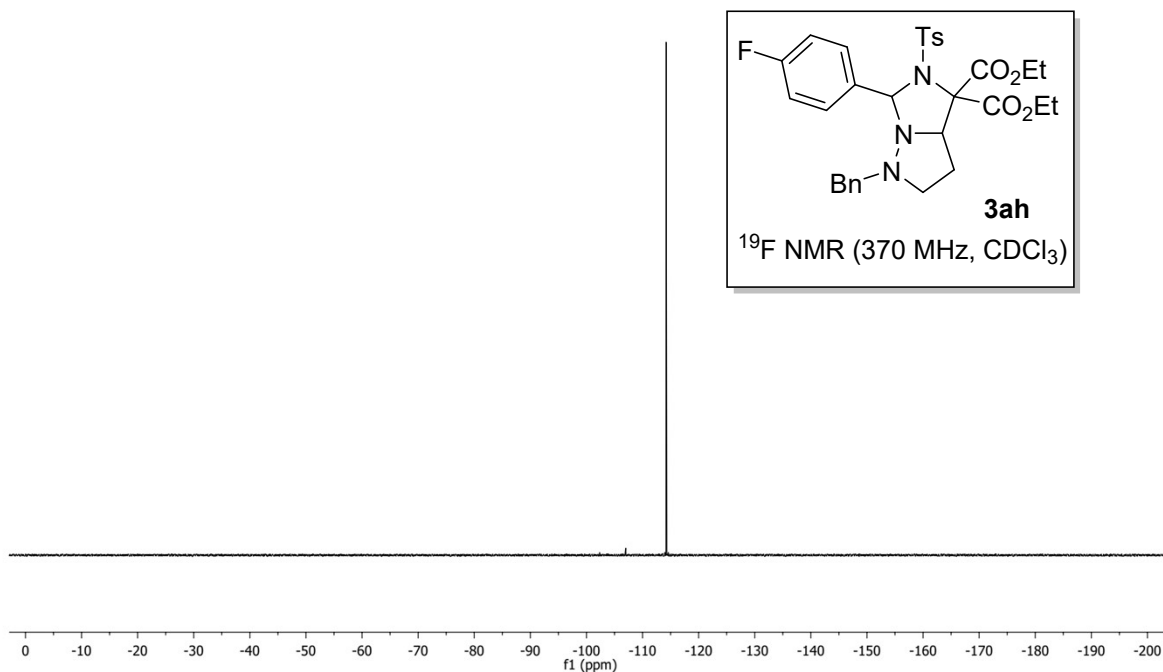

SS-178 1H

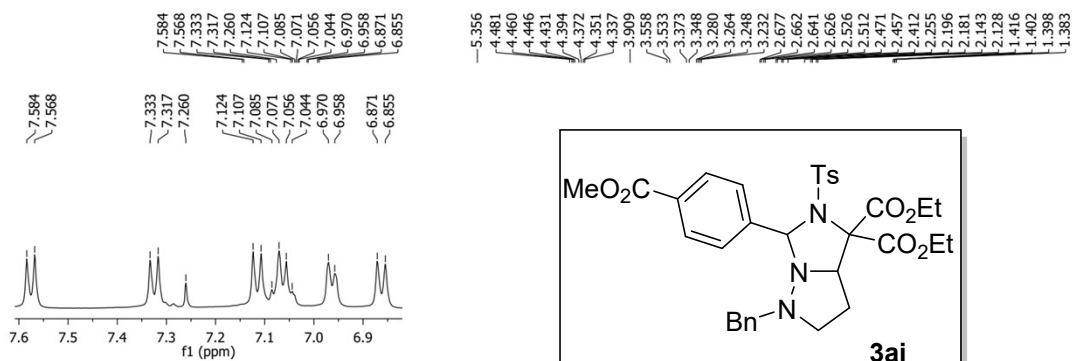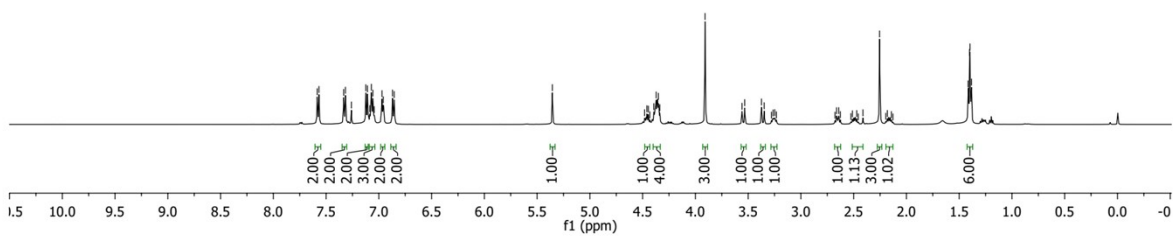

SS-178 13C

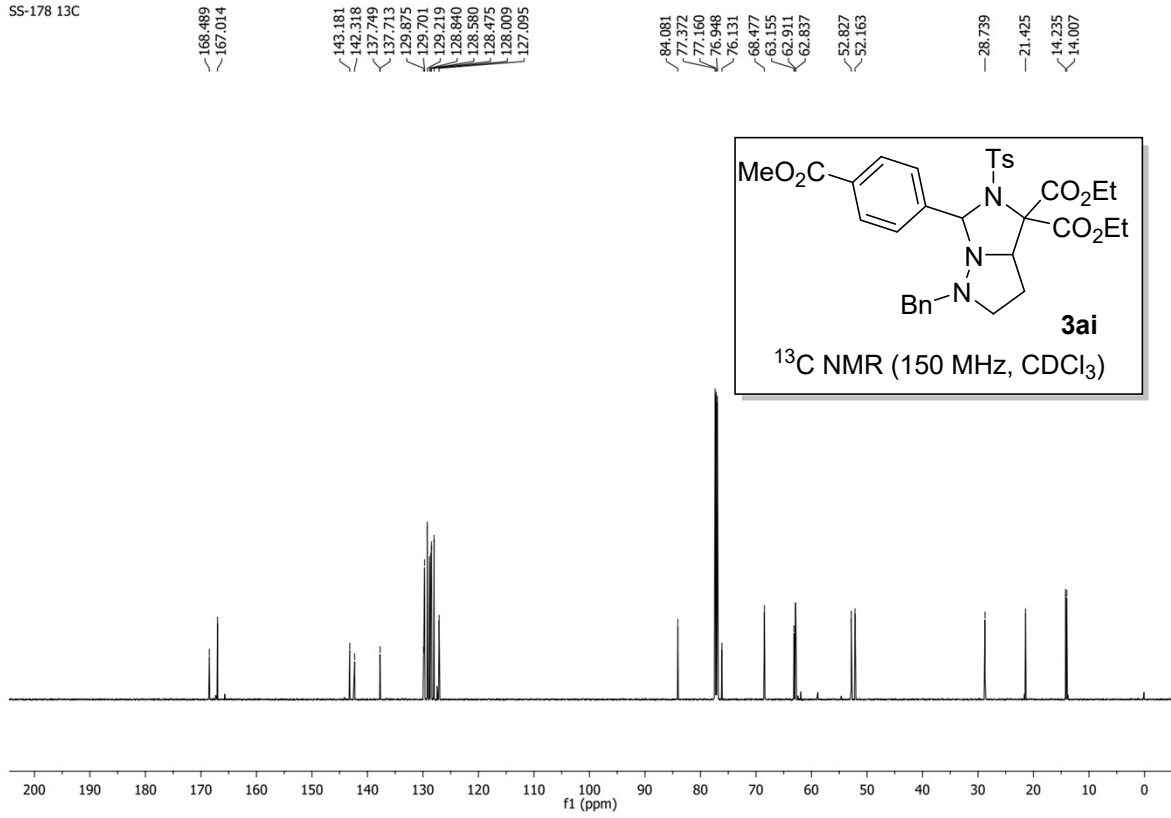

SS-130 1H

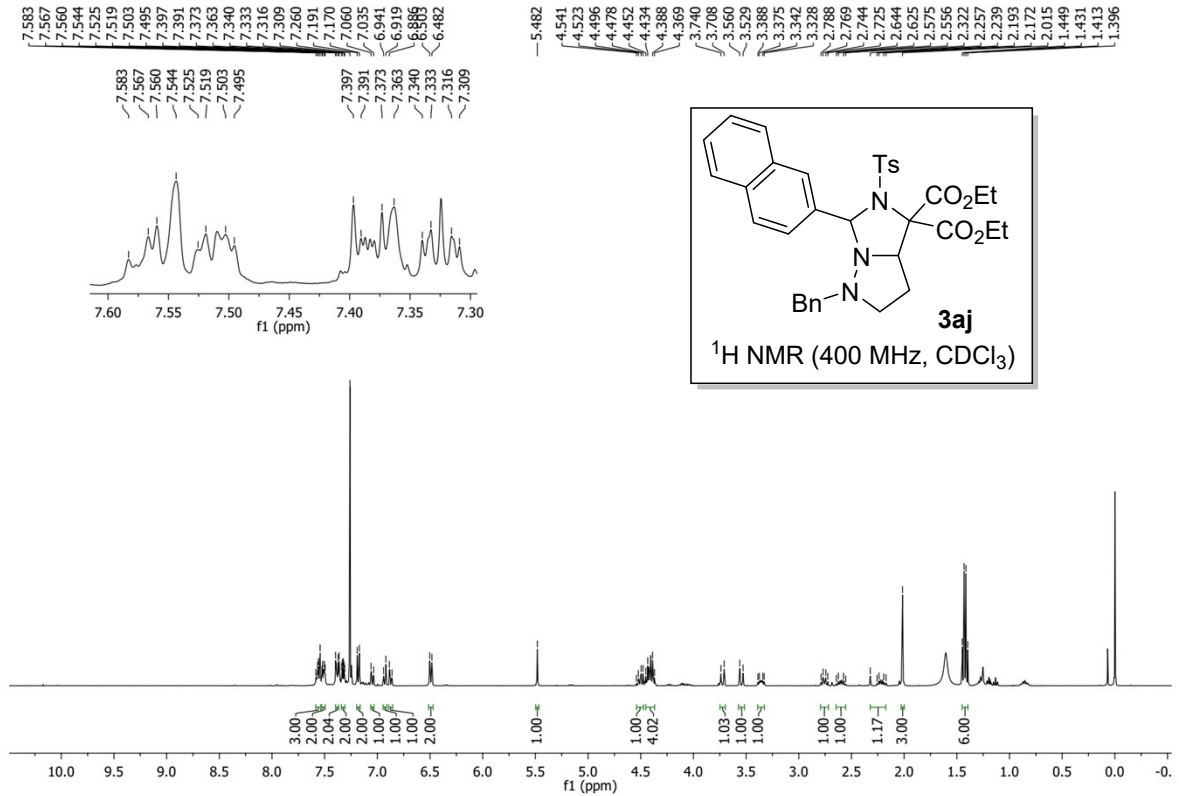

SS-130 13C

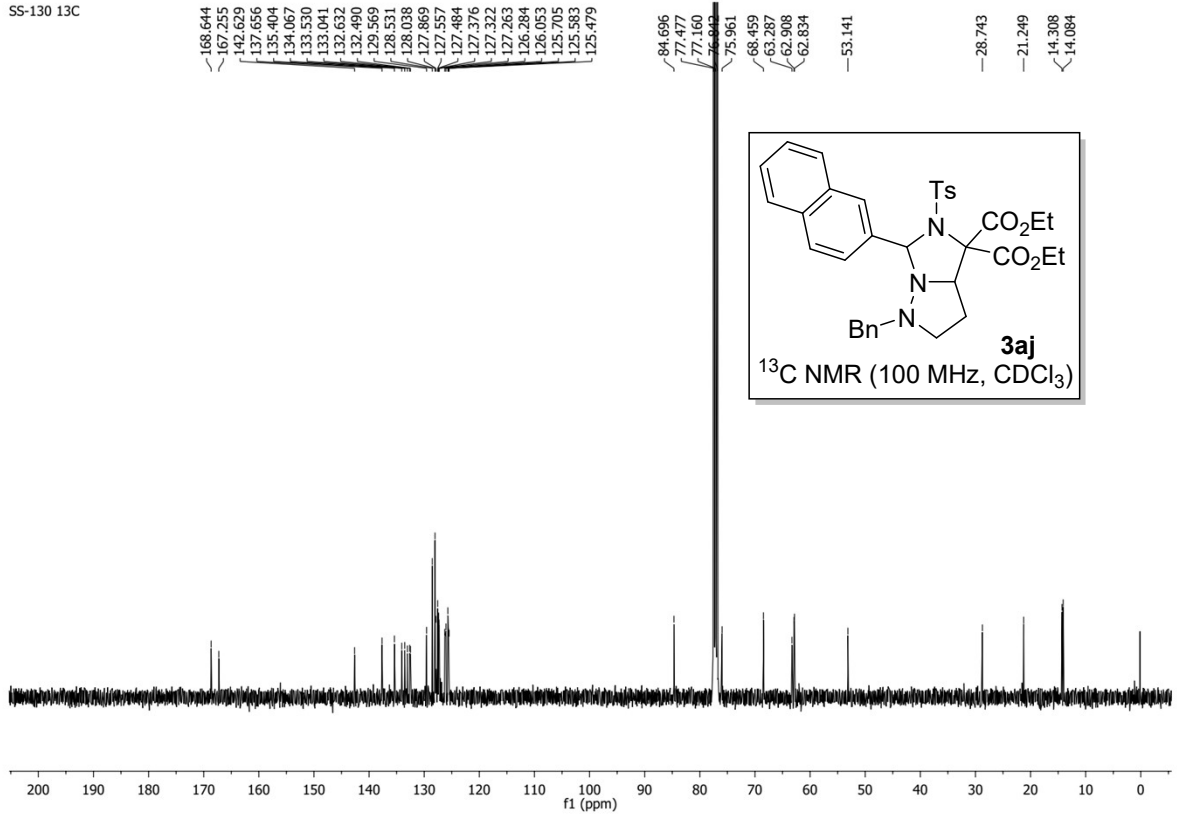

SS-205-A-1H

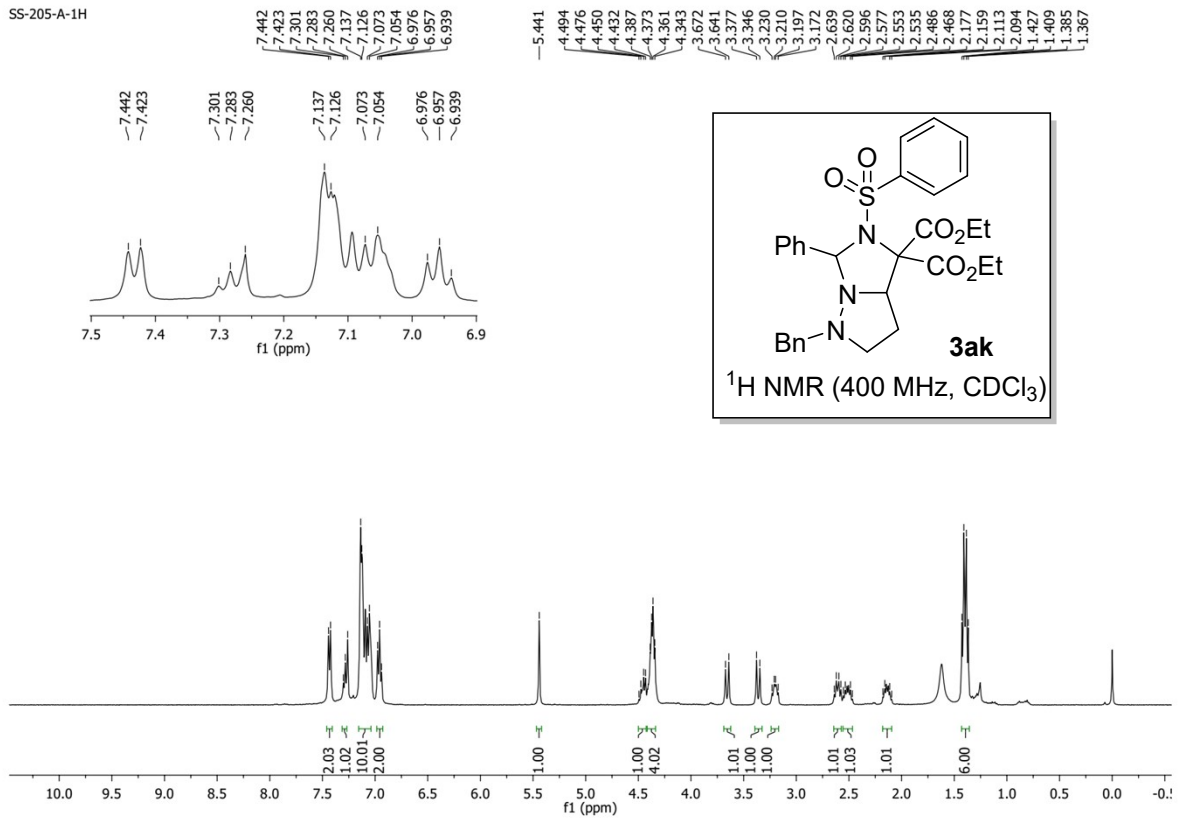

SS-205 13C

168.520  
167.163

141.052  
137.857  
136.994  
131.948  
129.687  
129.239  
128.495  
128.478  
128.097  
127.777  
127.141

84.849  
77.371  
77.160  
76.948  
76.187  
68.943  
63.083  
62.823  
62.783

52.646

28.360

14.222  
14.028

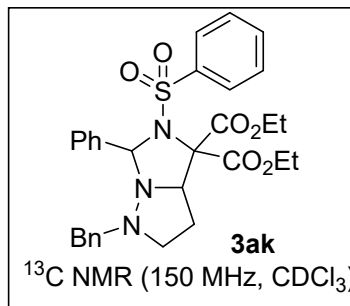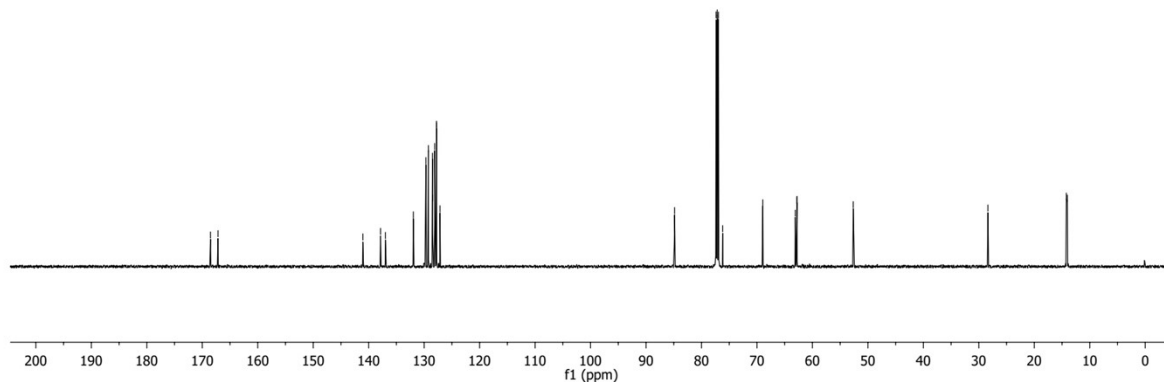

SS-202 1H

7.356  
7.342

7.260

7.132  
7.129  
7.124  
7.112  
7.046  
7.032  
7.026  
7.020  
7.005  
6.993  
6.980

5.416

4.476  
4.464  
4.434  
4.422  
4.393  
4.378  
4.338  
4.327

3.640  
3.380  
3.359  
3.241  
3.232  
3.210  
3.201

2.649  
2.636  
2.619  
2.607  
2.542  
2.530

2.496  
2.484  
2.170  
2.157  
2.126  
2.113

1.418  
1.406  
1.390  
1.378

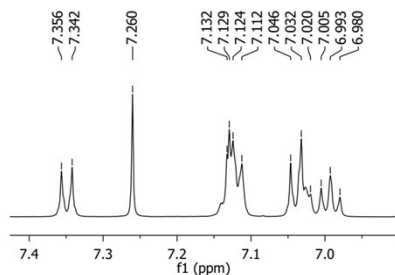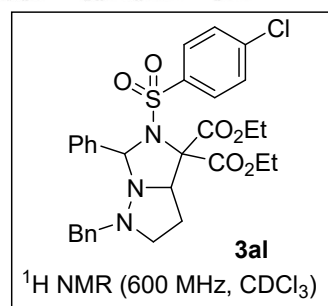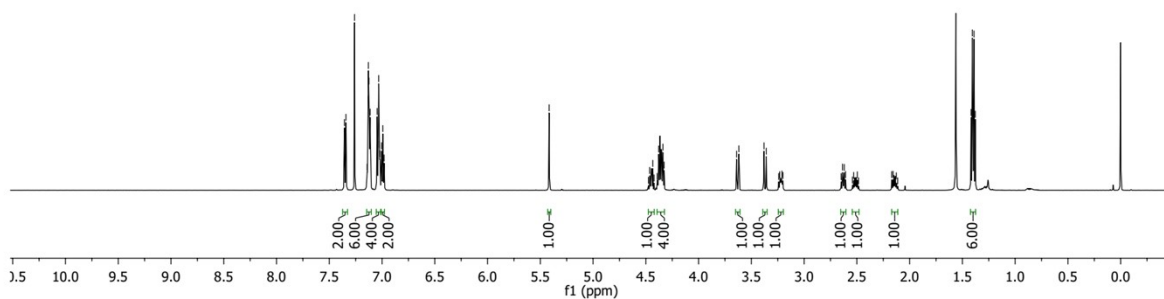



SS-202 13C

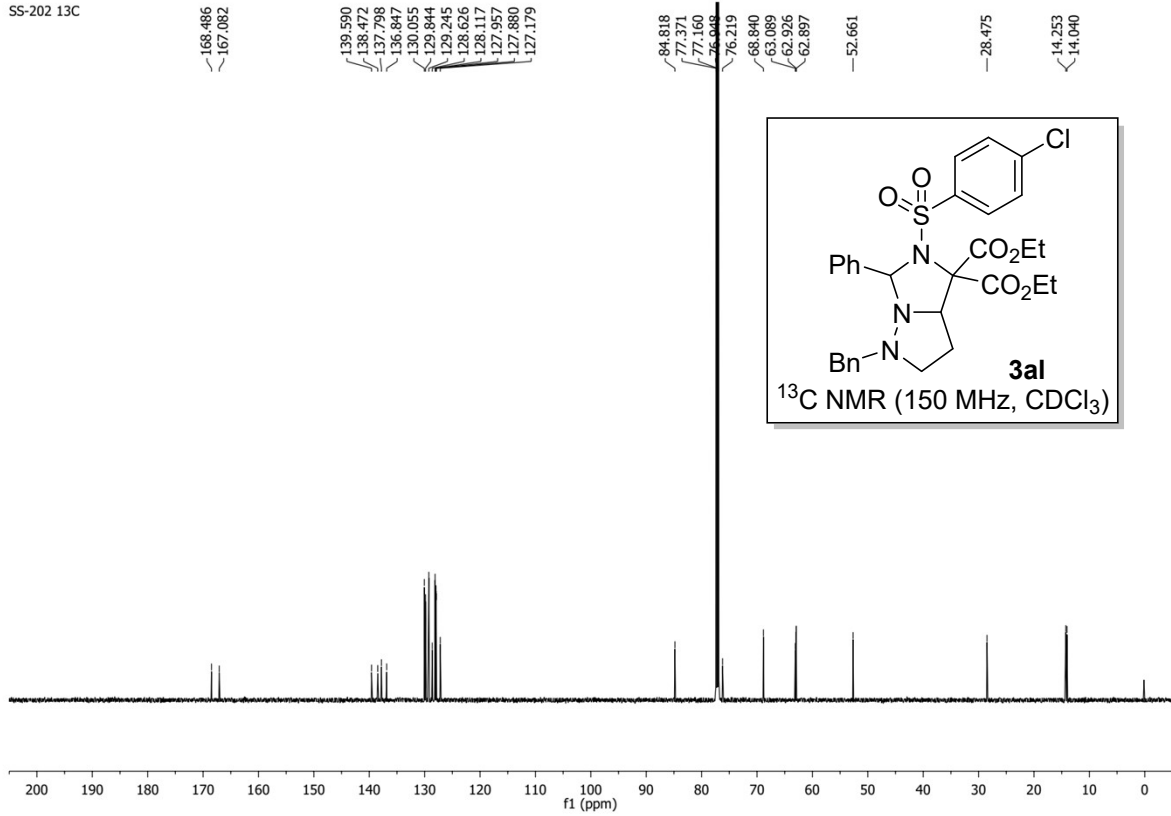

SS-179-A-1H

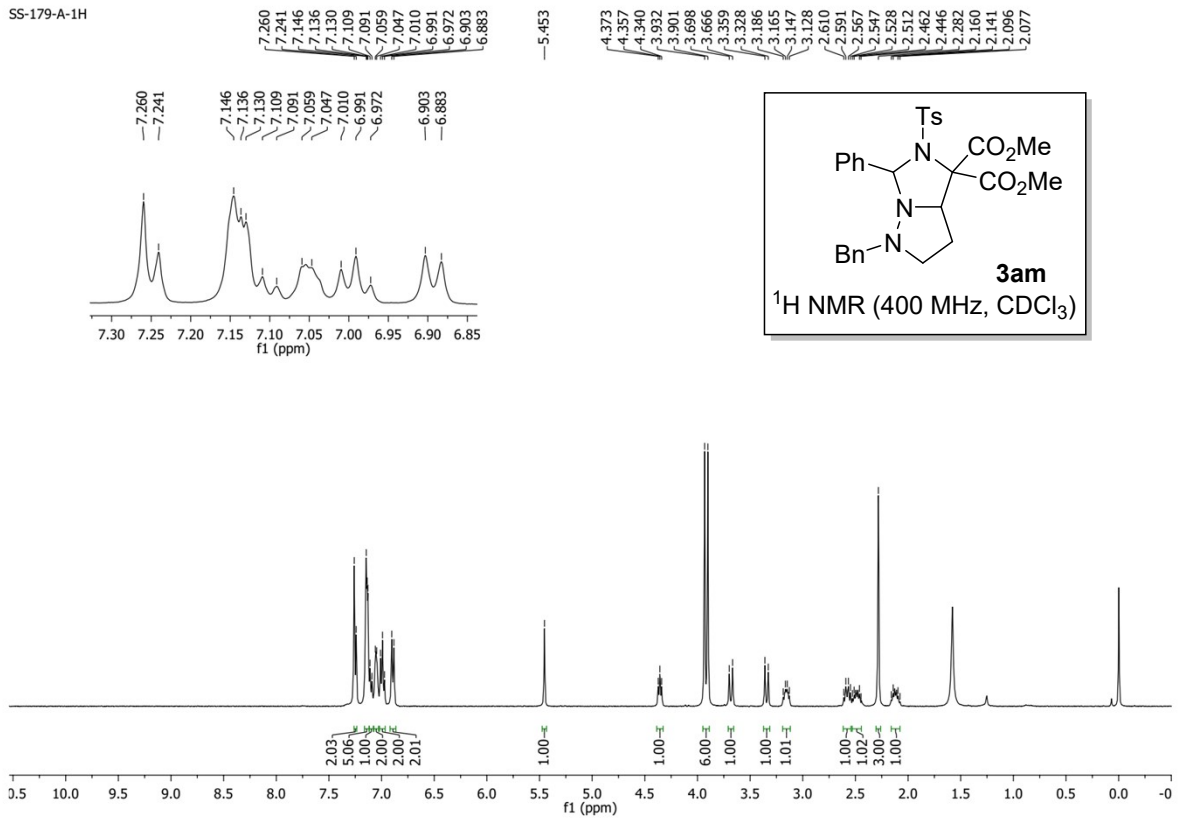

SS-179 13C

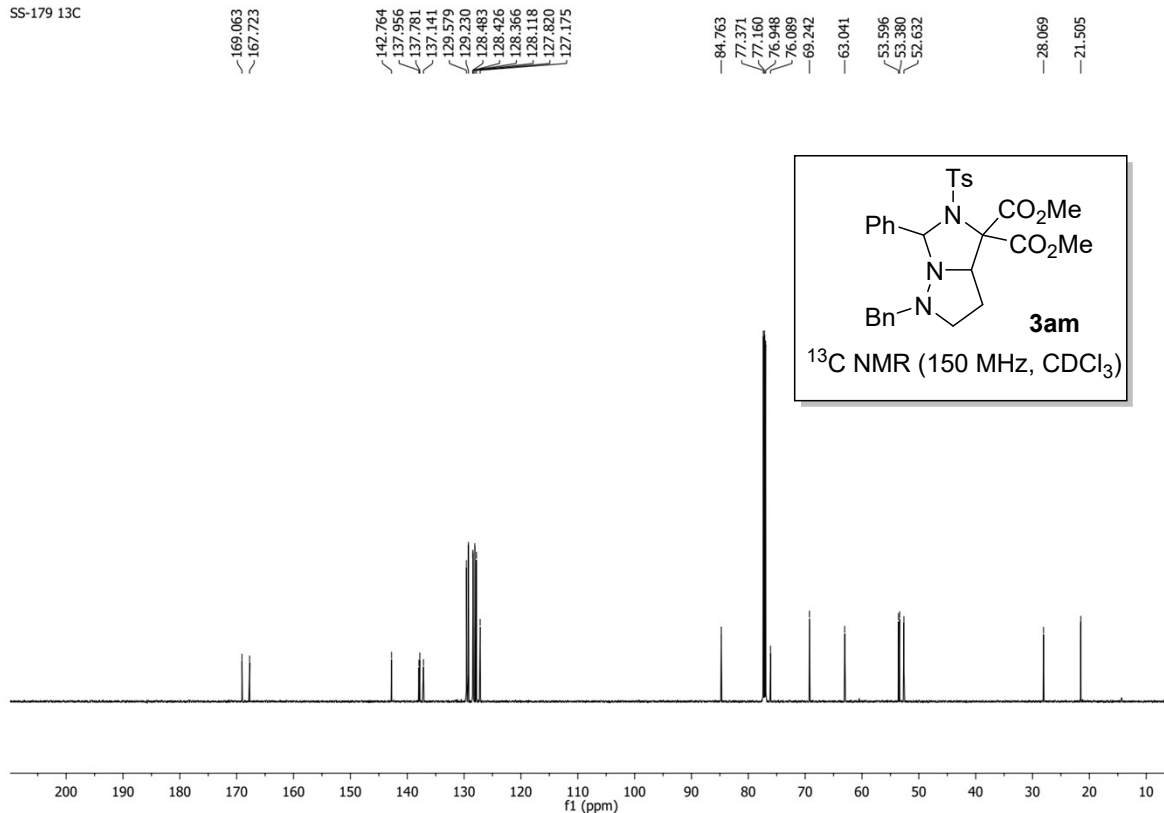

SS-193-1H

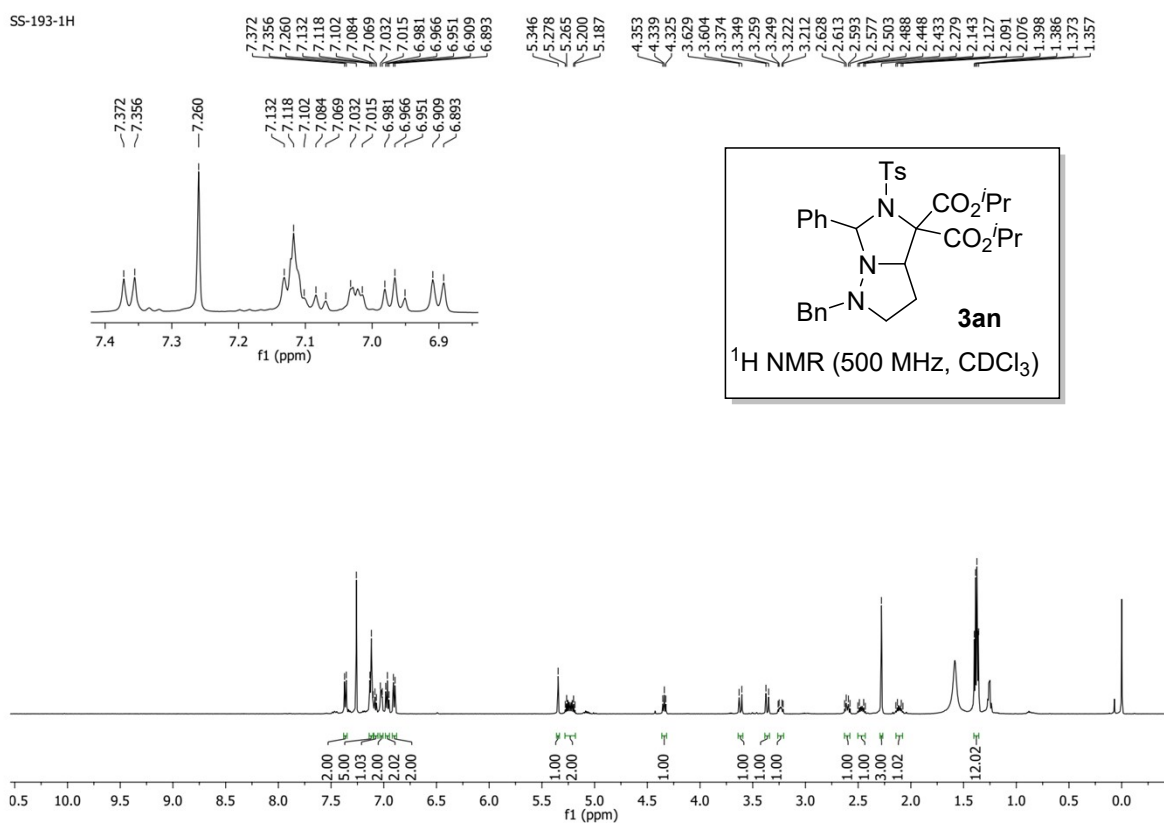

SS-193-13C

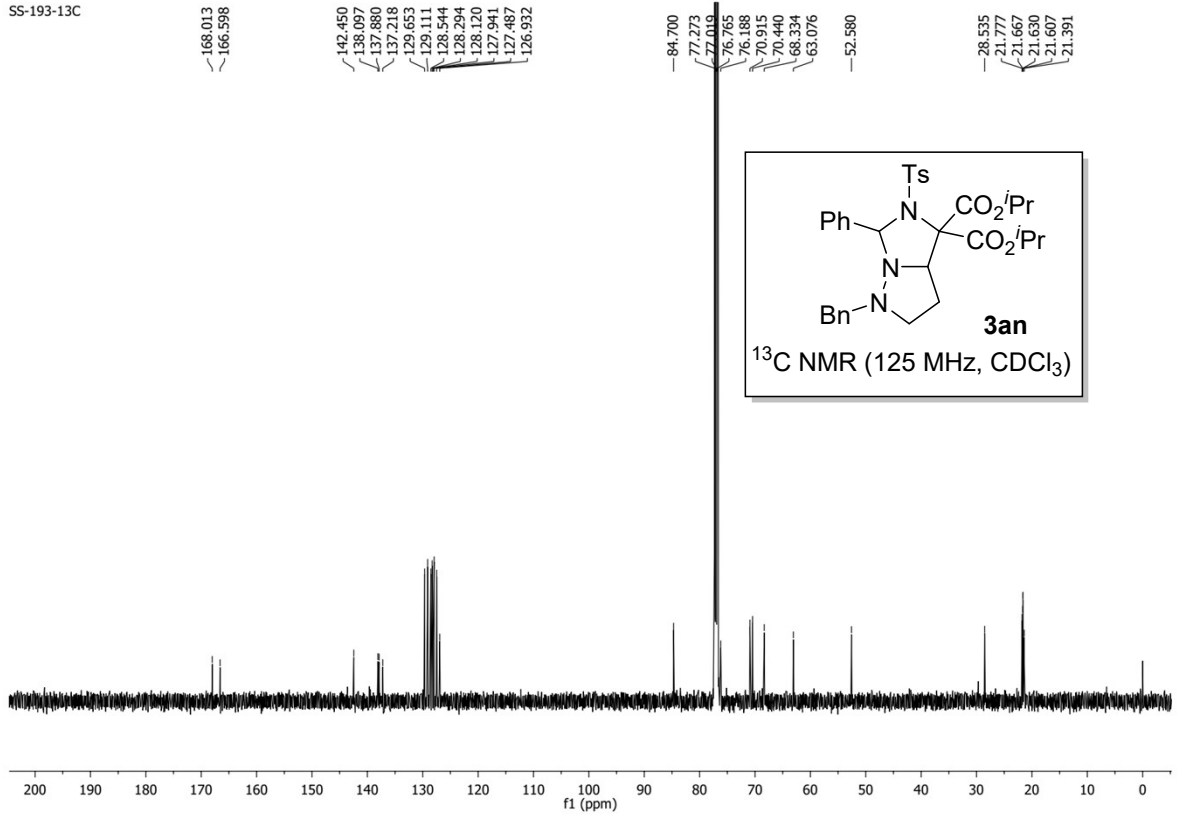

SS-293-1H

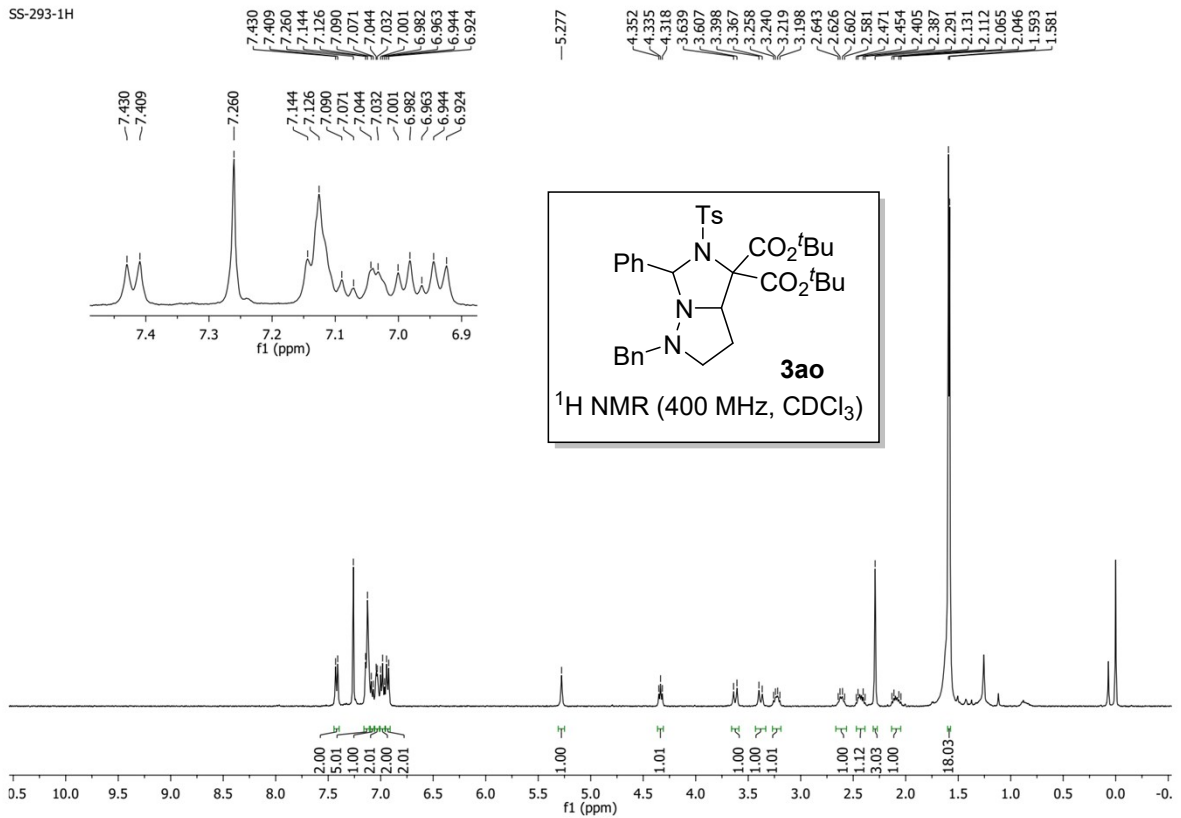

SS-293-13C

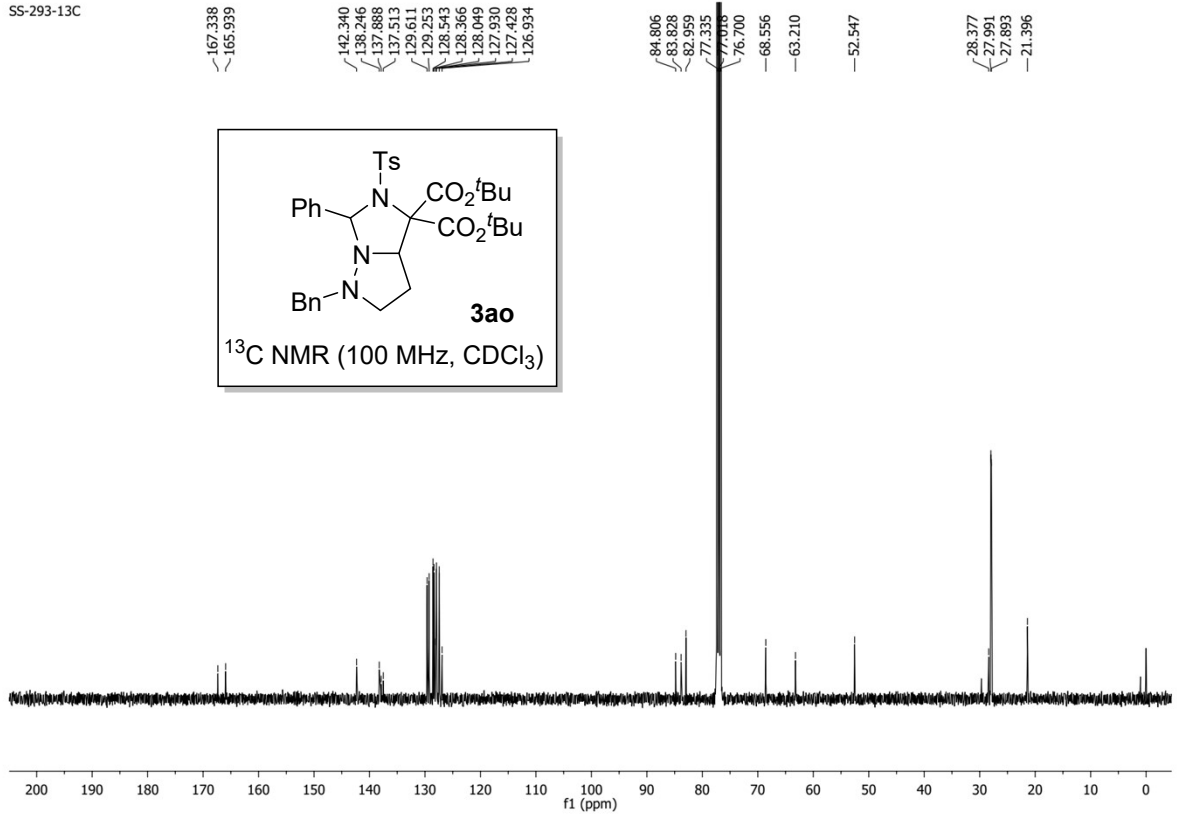

SS-231 1H

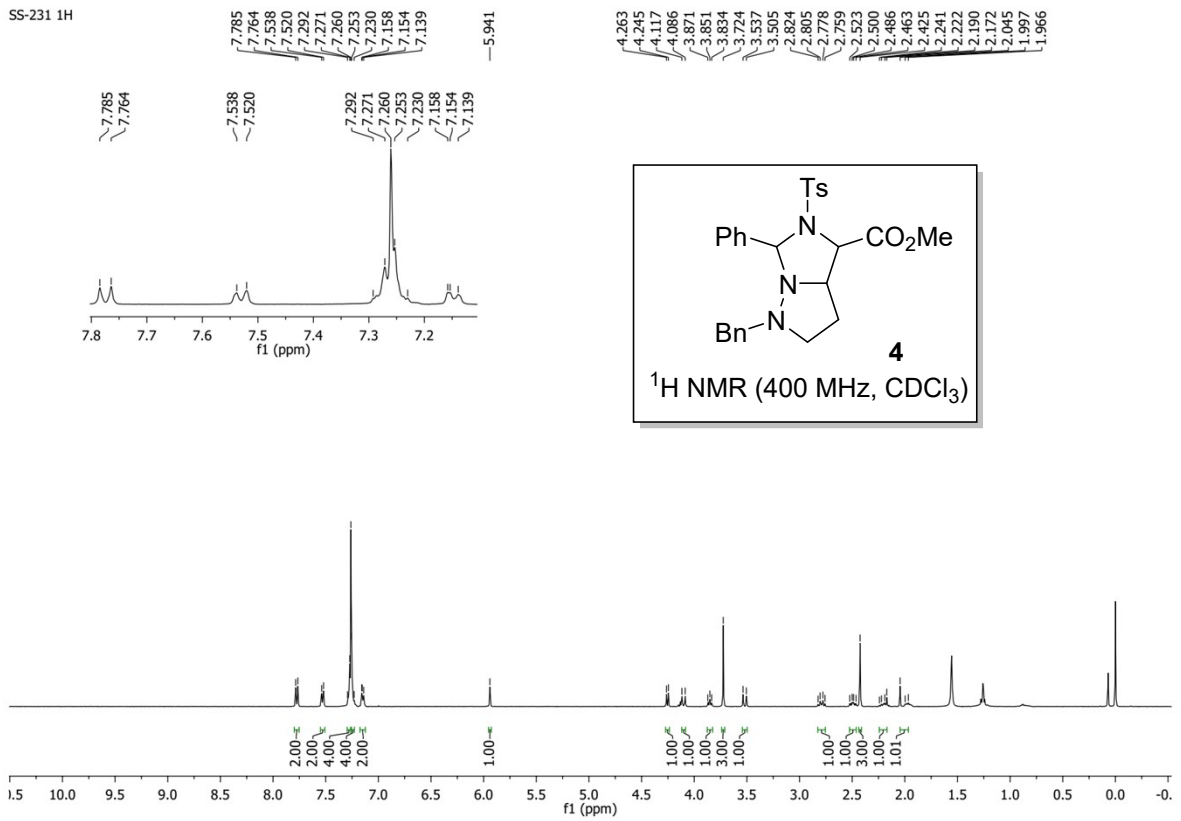

SS-231 13C

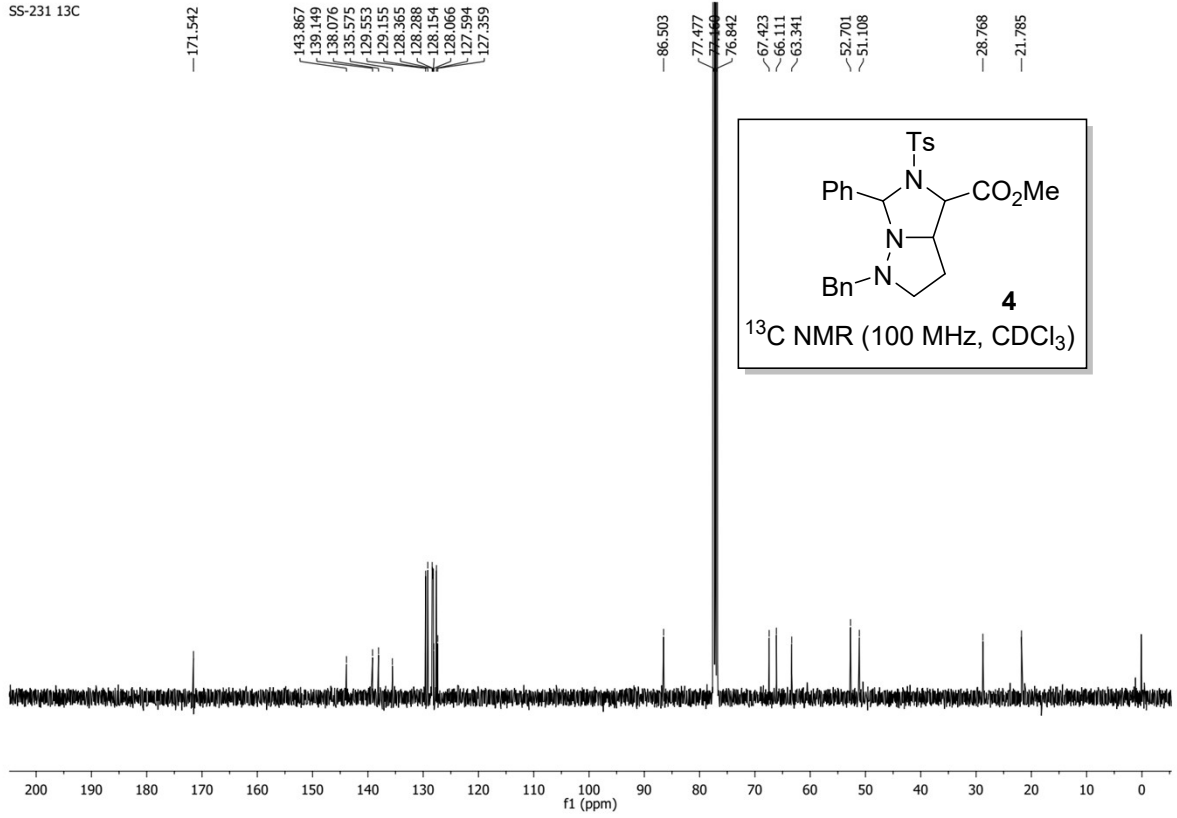

SS-302-1H

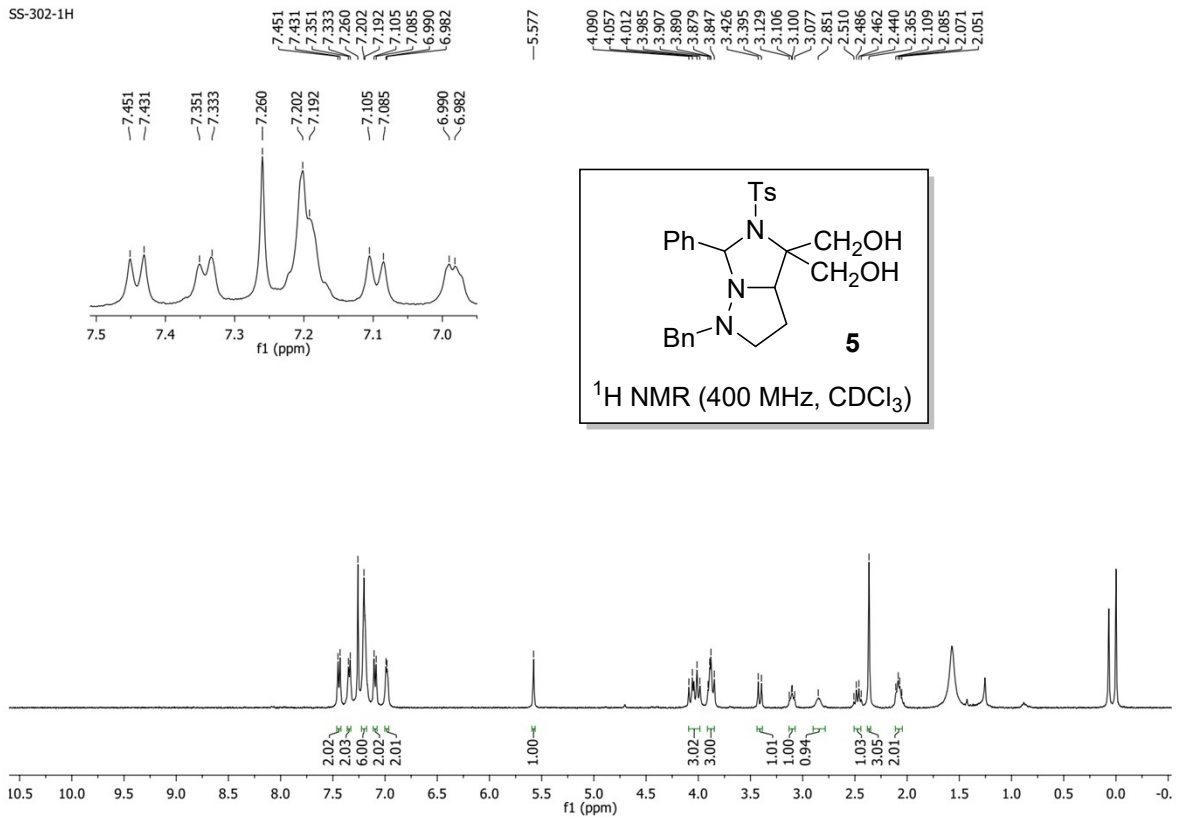

SS-302-13C

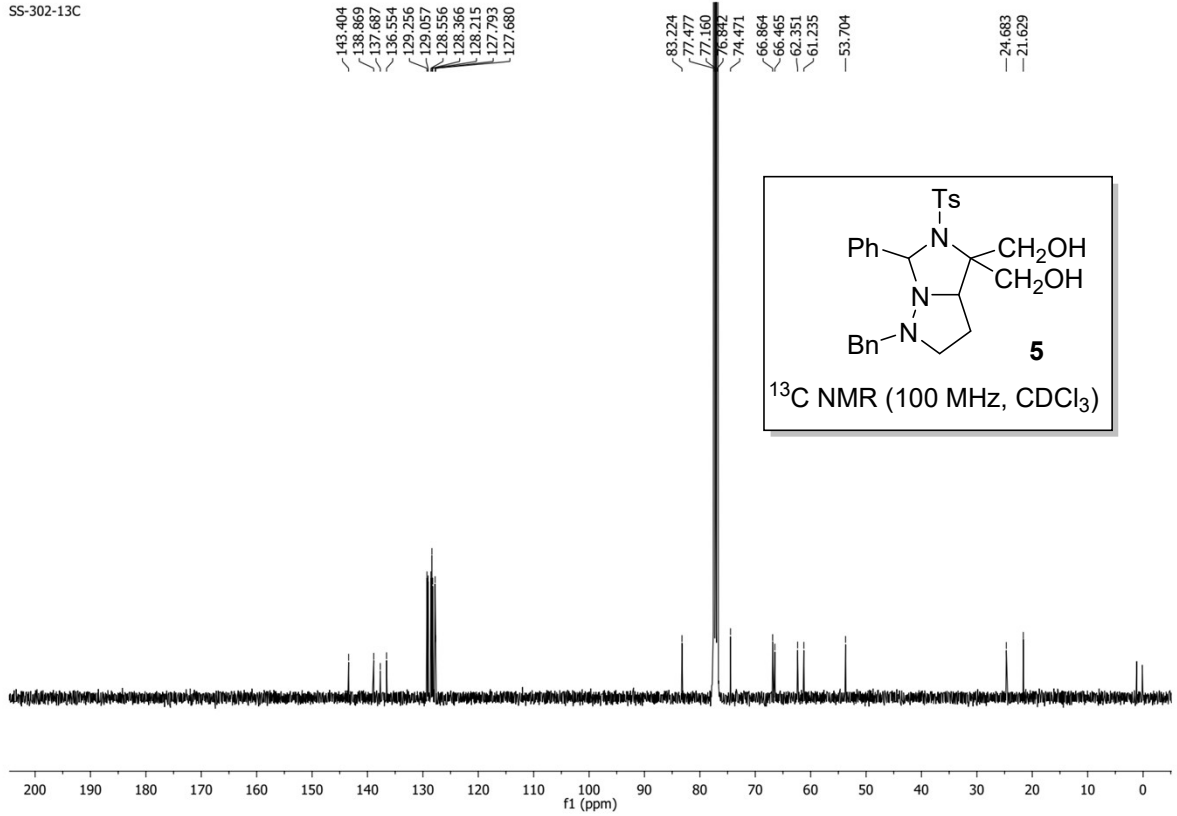

SS-128 1H

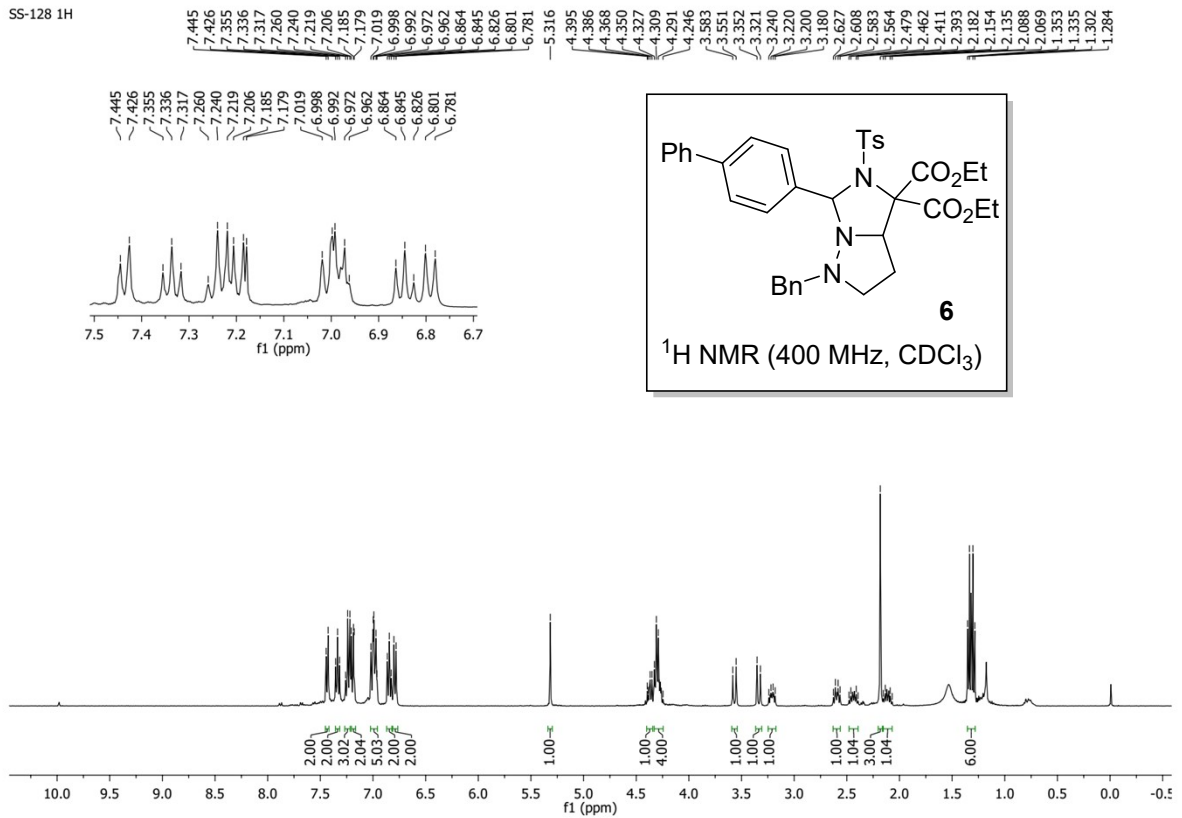

SS-128 13C

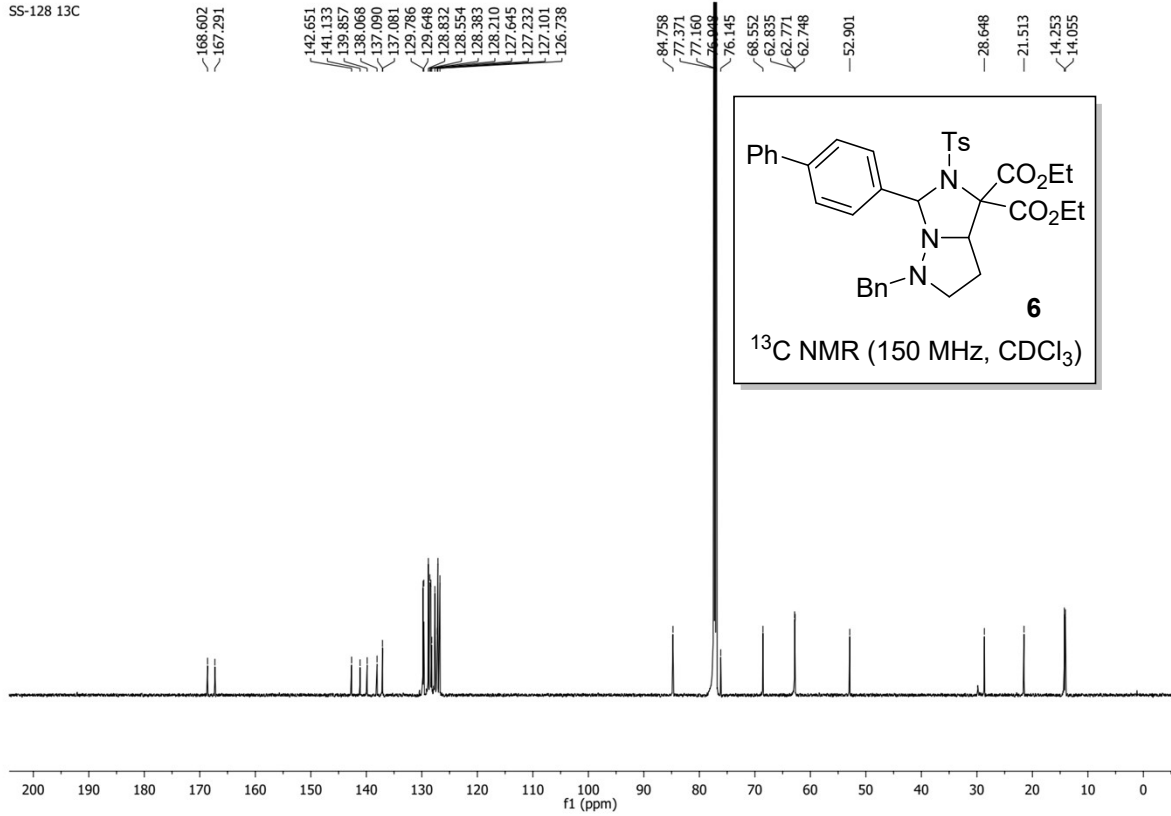

SS-DIA-H 1H

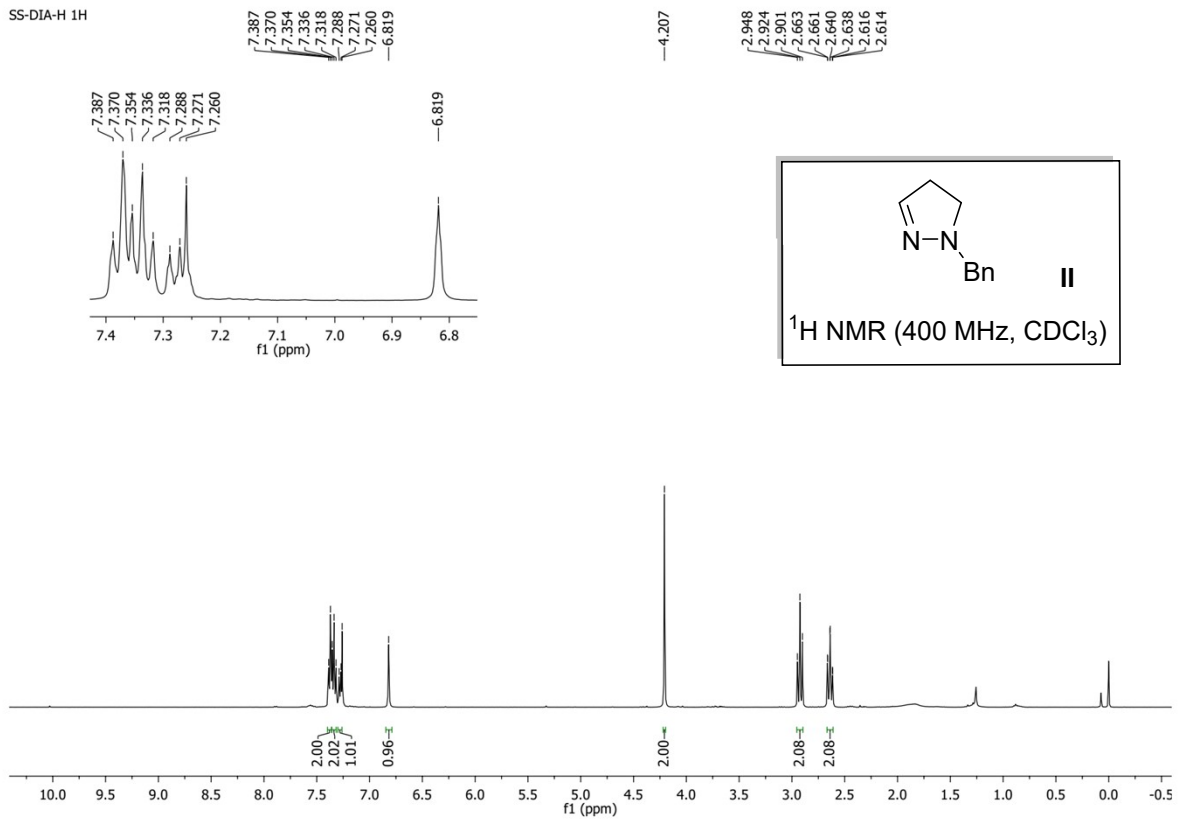

SS-DIA-H

—143.519  
—137.733  
—129.112  
—128.470  
—127.395

77.414  
77.160  
76.906

—60.774

—52.251

—34.270

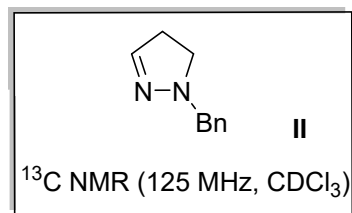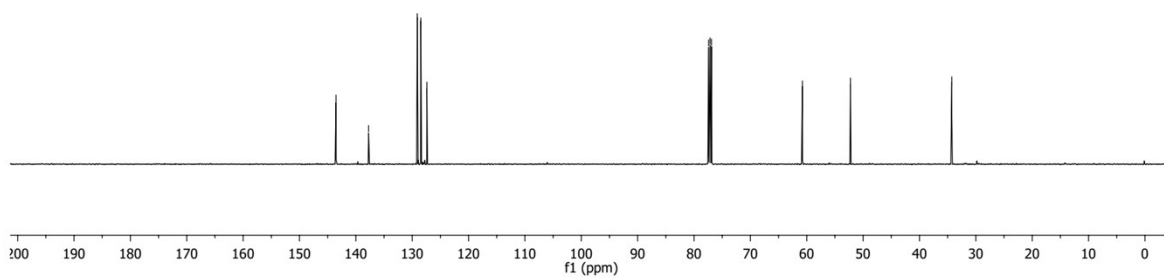

Supplement: d4cc00226a1.pdf [file d4cc00226a1.pdf]
